# Supplementary material
Source: publisher figshare collection journal article supplement (https://springernature.figshare.com/ndownloader/files/23755525)
Supplement: Supplementary file 1 [file 23755525]

seq_id	Control_group_count	TBT_treatment_count	Control_group_fpkm	TBT_treatment_fpkm	log2FC(TBT_treatment/Control_group)	p-value	FDR	significant	regulate	NR_Description	Swissprot_Description	String_description	KEGG_GENE	Pfam
c108923_g1	4091.00	0.00	329.516	0.000	-11.69	7.09e-11	1.23e-06	yes	down	hypothetical protein PUNSTDRAFT_78207, partial [Punctularia strigosozonata HHB-11173 hypothetical protein PUNSTDRAFT_78207, partial [	RecName: Full=Protein TAR1; AltName: Full=Transcript antisense to ribosomal RNA protein 1 [Saccharomyces cerevisiae S288c]	annotation not available	_	_
c116182_g1	4073.00	0.00	390.464	0.000	-11.93	7.20e-11	1.23e-06	yes	down	hypothetical protein TSTA_040370 [Talaromyces stipitatus ATCC 10500]	_	annotation not available	_	_
c118881_g4	2012.00	0.00	89.173	0.000	-9.80	8.87e-10	8.52e-06	yes	down	_	_	_	_	_
c119276_g1	2981.00	1.00	177.563	0.036	-10.35	9.98e-10	8.52e-06	yes	down	_	_	_	_	_
c117903_g1	11.00	10284.00	0.305	277.222	9.42	1.89e-09	1.29e-05	yes	up	Collagen alpha-4(VI) chain [Crassostrea gigas]	_	_	PTPRQ	PF00092.25|VWA|von Willebrand factor type A domain|m.40667:187-359;PF13519.3|VWA_2|von Willebrand factor type A domain|m.40667:188-299
c96262_g1	0.00	1233.00	0.000	29.047	8.19	4.59e-09	2.05e-05	yes	up	PREDICTED: centromere-associated protein E-like [Danio rerio]	RecName: Full=GTPase IMAP family member 4; AltName: Full=Immunity-associated nucleotide 1 protein; Short=IAN-1; Short=hIAN1; AltName: Full=Immunity-associated prot	_	_	PF04548.13|AIG1|AIG1 family|m.62389:9-211;PF01926.20|MMR_HSR1|50S ribosome-binding GTPase|m.62389:10-130
c111113_g1	0.00	1201.00	0.000	37.679	8.56	5.05e-09	2.05e-05	yes	up	_	_	_	_	_
c85559_g1	1225.00	0.00	42.473	0.000	-8.73	5.17e-09	2.05e-05	yes	down	_	_	_	_	_
c165382_g1	1180.00	0.00	242.555	0.000	-11.24	5.92e-09	2.05e-05	yes	down	_	_	_	_	_
c122986_g2	1173.00	0.00	85.861	0.000	-9.75	6.04e-09	2.05e-05	yes	down	_	_	_	_	_
c118160_g1	0.00	1113.00	0.000	37.170	8.54	6.61e-09	2.05e-05	yes	up	PREDICTED: uncharacterized protein LOC101857434 [Aplysia californica]	_	_	_	_
c104557_g2	1087.00	0.00	209.308	0.000	-11.03	7.93e-09	2.26e-05	yes	down	_	_	_	_	_
c98544_g1	1061.00	0.00	64.198	0.000	-9.33	8.62e-09	2.27e-05	yes	down	_	_	_	_	PF04089.11|BRICHOS|BRICHOS domain|m.19912:59-138
c122978_g2	1561.00	1.00	68.266	0.048	-8.85	9.96e-09	2.43e-05	yes	down	PREDICTED: uncharacterized protein LOC102429693 [Myotis lucifugus]	_	_	_	PF04970.10|LRAT|Lecithin retinol acyltransferase|m.24376:29-145
c174317_g1	0.00	919.00	0.000	90.924	9.83	1.30e-08	2.97e-05	yes	up	_	_	_	_	_
c90102_g1	0.00	862.00	0.000	16.924	7.41	1.64e-08	3.49e-05	yes	up	scavenger receptor cysteine-rich protein type 12 precursor [Strongylocentrotus purpuratus]	RecName: Full=Scavenger receptor cysteine-rich domain superfamily protein; Short=ApSRCR1; Flags: Precursor	_	_	PF00530.15|SRCR|Scavenger receptor cysteine-rich domain|m.15190:34-132;PF00530.15|SRCR|Scavenger receptor cysteine-rich domain|m.15190:143-241;PF00530.15|SRCR|Scavenger receptor cysteine-rich domain|m.15190:253-348;PF00530.15|SRCR|Scavenger receptor cysteine-rich domain|m.15190:360-455;PF00530.15|SRCR|Scavenger receptor cysteine-rich domain|m.15190:467-564;PF00530.15|SRCR|Scavenger receptor cyste…
c110358_g3	2.00	1683.00	0.073	57.076	8.37	1.92e-08	3.86e-05	yes	up	_	_	_	_	_
c174526_g1	0.00	806.00	0.000	34.309	8.43	2.08e-08	3.94e-05	yes	up	_	_	_	_	_
c163009_g1	789.00	0.00	37.206	0.000	-8.54	2.47e-08	4.26e-05	yes	down	_	_	_	_	_
c96210_g1	0.00	766.00	0.000	45.244	8.82	2.49e-08	4.26e-05	yes	up	_	_	_	_	_
c70752_g1	733.00	0.00	19.208	0.000	-7.59	3.20e-08	5.10e-05	yes	down	_	_	_	_	_
c122595_g4	721.00	0.00	55.278	0.000	-9.11	3.40e-08	5.10e-05	yes	down	_	_	_	_	_
c105643_g1	719.00	0.00	264.879	0.000	-11.37	3.43e-08	5.10e-05	yes	down	plant senescence-associated protein, putative [Rhizoctonia solani AG-3 Rhs1AP]	RecName: Full=Putative uncharacterized protein ART2; AltName: Full=Antisense to ribosomal RNA transcript protein 2 [Saccharomyces cerevisiae S288c]	annotation not avaliable	_	_
c93064_g2	1084.00	1.00	85.788	0.061	-9.06	3.64e-08	5.18e-05	yes	down	_	_	_	_	_
c106144_g1	689.00	0.00	78.469	0.000	-9.62	3.98e-08	5.44e-05	yes	down	_	_	_	_	_
c123346_g3	0.00	625.00	0.000	68.860	9.43	5.10e-08	6.71e-05	yes	up	_	_	_	_	_
c123977_g1	2512.00	6.00	59.066	0.133	-7.99	5.71e-08	7.23e-05	yes	down	PREDICTED: CD109 antigen-like isoform 1 [Macaca mulatta]	RecName: Full=CD109 antigen; AltName: Full=150 kDa TGF-beta-1-binding protein; AltName: Full=C3 and PZP-like alpha-2-macroglobulin domain-containing protein 7; Al	_	CD109	PF07703.11|A2M_N_2|Alpha-2-macroglobulin family N-terminal region|m.63840:461-597;PF01835.16|A2M_N|MG2 domain|m.63840:136-216;PF00207.19|A2M|Alpha-2-macroglobulin family|m.63840:743-780
c98368_g1	594.00	0.00	18.365	0.000	-7.53	6.74e-08	8.01e-05	yes	down	_	_	_	_	_
c123437_g1	589.00	0.00	43.951	0.000	-8.78	6.95e-08	8.01e-05	yes	down	_	_	_	_	_
c116182_g2	587.00	0.00	55.278	0.000	-9.11	7.03e-08	8.01e-05	yes	down	hypothetical protein BAUCODRAFT_127550 [Baudoinia compniacensis UAMH 10762]	_	_	_	_
c125973_g5	0.00	552.00	0.000	14.633	7.20	7.92e-08	8.72e-05	yes	up	_	_	_	_	_
c107073_g9	30.00	8596.00	1.307	328.527	7.87	8.44e-08	9.01e-05	yes	up	_	_	_	_	_
c107093_g1	547.00	0.00	31.573	0.000	-8.31	9.00e-08	9.01e-05	yes	down	_	_	_	_	PF04970.10|LRAT|Lecithin retinol acyltransferase|m.78690:61-200
c108573_g1	544.00	0.00	39.723	0.000	-8.64	9.18e-08	9.01e-05	yes	down	PREDICTED: uncharacterized protein LOC101851650 [Aplysia californica]	RecName: Full=Complement C1q tumor necrosis factor-related protein 2; Short=mCTRP2; Flags: Precursor [Mus musculus]	_	_	PF00386.18|C1q|C1q domain|m.34131:51-175
c116020_g6	538.00	0.00	56.145	0.000	-9.14	9.55e-08	9.01e-05	yes	down	_	_	_	_	_
c118644_g1	823.00	1.00	50.146	0.182	-7.48	9.63e-08	9.01e-05	yes	down	conserved hypothetical protein, partial [Parabacteroides sp. D13]	_	_	_	_
c105460_g1	1.00	798.00	0.012	13.069	6.88	9.76e-08	9.01e-05	yes	up	_	_	_	_	_
c122131_g2	0.00	508.00	0.000	30.308	8.25	1.06e-07	9.57e-05	yes	up	_	_	_	_	_
c124847_g1	500.00	0.00	10.618	0.000	-6.74	1.24e-07	1.09e-04	yes	down	_	_	_	_	PF13895.3|Ig_2|Immunoglobulin domain|m.41692:747-819
c92356_g1	494.00	0.00	26.270	0.000	-8.04	1.30e-07	1.11e-04	yes	down	PREDICTED: uncharacterized protein LOC101234471, partial [Hydra vulgaris]	_	_	_	PF00089.23|Trypsin|Trypsin|m.70649:195-350
c120128_g1	702.00	1.00	84.640	0.121	-8.58	1.69e-07	1.40e-04	yes	down	_	_	_	_	_
c105847_g1	455.00	0.00	9.457	0.000	-6.58	1.73e-07	1.40e-04	yes	down	unnamed protein product [Oncorhynchus mykiss]	_	_	CUBN	PF00431.17|CUB|CUB domain|m.56127:68-178;PF00431.17|CUB|CUB domain|m.56127:303-408;PF00431.17|CUB|CUB domain|m.56127:415-531;PF00431.17|CUB|CUB domain|m.56127:543-649;PF00431.17|CUB|CUB domain|m.56127:654-764;PF00431.17|CUB|CUB domain|m.56127:770-877
c82394_g1	28.00	6539.00	1.821	416.748	7.76	1.77e-07	1.40e-04	yes	up	_	_	_	_	PF15633.3|Tox-ART-HYD1|HYD1 signature containing ADP-ribosyltransferase|m.38802:45-139
c54394_g1	11.00	2849.00	0.513	131.379	7.74	1.80e-07	1.40e-04	yes	up	_	_	_	_	_
c111287_g1	441.00	0.00	30.180	0.000	-8.24	1.93e-07	1.46e-04	yes	down	_	_	_	_	_
c109044_g2	0.00	427.00	0.000	32.017	8.33	1.96e-07	1.46e-04	yes	up	_	_	_	_	_
c113886_g1	0.00	422.00	0.000	11.250	6.83	2.05e-07	1.49e-04	yes	up	_	_	_	_	_
c110191_g7	428.00	0.00	9.580	0.000	-6.60	2.15e-07	1.51e-04	yes	down	_	_	_	_	_
c108785_g1	427.00	0.00	15.396	0.000	-7.28	2.17e-07	1.51e-04	yes	down	_	_	_	_	_
c176286_g1	424.00	0.00	69.464	0.000	-9.44	2.22e-07	1.52e-04	yes	down	PREDICTED: cubilin-like [Aplysia californica]	_	_	PLG	PF00089.23|Trypsin|Trypsin|m.69957:2-103
c52700_g1	1.00	619.00	0.122	75.661	8.41	2.40e-07	1.61e-04	yes	up	_	_	_	_	_
c106982_g2	0.00	395.00	0.000	6.886	6.13	2.60e-07	1.71e-04	yes	up	_	_	_	_	_
c127070_g1	396.00	0.00	4.289	0.000	-5.46	2.81e-07	1.81e-04	yes	down	_	_	_	_	_
c128814_g1	384.00	0.00	12.536	0.000	-6.98	3.14e-07	1.99e-04	yes	down	_	_	_	_	_
c126450_g2	0.00	369.00	0.000	26.223	8.04	3.29e-07	2.04e-04	yes	up	_	_	_	_	PF04548.13|AIG1|AIG1 family|m.38573:45-128
c56351_g1	0.00	359.00	0.000	10.826	6.77	3.62e-07	2.21e-04	yes	up	_	_	_	_	_
c93064_g3	0.00	351.00	0.000	10.644	6.75	3.91e-07	2.35e-04	yes	up	_	_	_	_	_
c105508_g3	0.00	344.00	0.000	39.485	8.63	4.20e-07	2.47e-04	yes	up	GTPase IMAP family member 7 [Crassostrea gigas]	_	_	_	PF04548.13|AIG1|AIG1 family|m.56702:10-205;PF01926.20|MMR_HSR1|50S ribosome-binding GTPase|m.56702:11-131;PF04670.9|Gtr1_RagA|Gtr1/RagA G protein conserved region|m.56702:11-140;PF02421.15|FeoB_N|Ferrous iron transport protein B|m.56702:11-146
c120627_g3	345.00	0.00	10.716	0.000	-6.76	4.60e-07	2.63e-04	yes	down	_	_	_	_	_
c88712_g2	344.00	0.00	36.901	0.000	-8.53	4.65e-07	2.63e-04	yes	down	_	_	_	_	_
c116020_g5	0.00	333.00	0.000	35.230	8.46	4.70e-07	2.63e-04	yes	up	_	_	_	_	_
c120107_g2	336.00	0.00	12.109	0.000	-6.93	5.06e-07	2.79e-04	yes	down	_	_	_	_	_
c85265_g1	0.00	320.00	0.000	57.064	9.16	5.45e-07	2.96e-04	yes	up	_	_	_	_	_
c94310_g1	77800.00	477.00	1479.207	8.923	-7.36	5.65e-07	3.02e-04	yes	down	putative membrane protein [Burkholderia sp. RPE67]	_	cell wall-associated hydrolase	_	_
c91047_g1	4646.00	27.00	2854.578	15.203	-7.54	5.80e-07	3.05e-04	yes	down	_	_	_	_	_
c124243_g1	0.00	309.00	0.000	3.989	5.35	6.15e-07	3.19e-04	yes	up	_	_	_	_	_
c50626_g1	0.00	305.00	0.000	8.171	6.37	6.44e-07	3.23e-04	yes	up	hypothetical protein LOTGIDRAFT_236872 [Lottia gigantea]	_	_	_	_
c103328_g1	0.00	305.00	0.000	8.317	6.40	6.44e-07	3.23e-04	yes	up	_	_	_	_	_
c114426_g1	305.00	0.00	8.199	0.000	-6.37	7.06e-07	3.50e-04	yes	down	_	_	_	_	PF00069.22|Pkinase|Protein kinase domain|m.77374:203-339
c111010_g1	1726.00	10.00	207.891	1.224	-7.30	8.80e-07	4.30e-04	yes	down	_	_	_	_	_
c125973_g1	0.00	272.00	0.000	6.886	6.13	9.57e-07	4.60e-04	yes	up	_	_	_	_	_
c104819_g2	5714.00	39.00	670.164	4.437	-7.21	1.02e-06	4.86e-04	yes	down	_	_	_	_	PF00386.18|C1q|C1q domain|m.35555:94-185
c87535_g1	41151.00	300.00	1275.703	9.129	-7.11	1.05e-06	4.90e-04	yes	down	hypothetical protein [Collinsella aerofaciens]	_	_	_	_
c106529_g2	692.00	3.00	44.330	0.194	-7.24	1.06e-06	4.91e-04	yes	down	_	_	_	_	_
c110761_g6	263.00	0.00	6.843	0.000	-6.12	1.20e-06	5.45e-04	yes	down	_	_	_	_	_
c89792_g1	262.00	0.00	13.587	0.000	-7.10	1.21e-06	5.45e-04	yes	down	_	_	_	_	_
c80924_g1	249.00	0.00	8.113	0.000	-6.36	1.43e-06	6.35e-04	yes	down	_	_	_	_	PF00084.17|Sushi|Sushi repeat (SCR repeat)|m.55954:177-237
c126910_g3	380.00	1.00	15.188	0.036	-6.81	1.47e-06	6.42e-04	yes	down	_	_	_	_	PF07686.14|V-set|Immunoglobulin V-set domain|m.11210:38-132
c126262_g1	246.00	0.00	11.840	0.000	-6.90	1.49e-06	6.46e-04	yes	down	_	_	_	_	_
c111204_g2	0.00	233.00	0.000	17.300	7.44	1.65e-06	7.07e-04	yes	up	GTPase IMAP family member 7 [Crassostrea gigas]	RecName: Full=GTPase IMAP family member 7; AltName: Full=Immunity-associated nucleotide 7 protein; Short=IAN-7 [Homo sapiens]	_	_	PF04548.13|AIG1|AIG1 family|m.34199:46-240;PF01926.20|MMR_HSR1|50S ribosome-binding GTPase|m.34199:47-150
c57053_g1	0.00	231.00	0.000	7.529	6.25	1.70e-06	7.19e-04	yes	up	_	_	_	_	_
c120982_g2	232.00	0.00	7.319	0.000	-6.21	1.84e-06	7.66e-04	yes	down	_	_	_	_	_
c118578_g3	228.00	0.00	14.149	0.000	-7.15	1.96e-06	8.05e-04	yes	down	_	_	_	_	PF07177.9|Neuralized|Neuralized|m.3265:127-189
c99231_g1	0.00	219.00	0.000	14.172	7.16	2.05e-06	8.31e-04	yes	up	_	_	_	_	_
c107073_g1	1.00	335.00	0.049	16.948	6.84	2.07e-06	8.31e-04	yes	up	_	_	_	_	_
c106210_g1	2.00	435.00	0.305	64.289	7.31	2.28e-06	9.00e-04	yes	up	_	_	_	_	_
c100857_g1	218.00	0.00	15.371	0.000	-7.27	2.29e-06	9.00e-04	yes	down	putative fibrillin 2 [Danaus plexippus]	_	_	FBLN1_2	PF07645.12|EGF_CA|Calcium-binding EGF domain|m.64646:1-25;PF07645.12|EGF_CA|Calcium-binding EGF domain|m.64646:27-57;PF14670.3|FXa_inhibition|Coagulation Factor Xa inhibitory site|m.64646:31-66
c32603_g1	0.00	210.00	0.000	20.852	7.71	2.37e-06	9.19e-04	yes	up	_	_	_	_	_
c86130_g1	0.00	209.00	0.000	15.784	7.31	2.41e-06	9.24e-04	yes	up	_	_	_	_	_
c125469_g5	213.00	0.00	23.900	0.000	-7.91	2.49e-06	9.29e-04	yes	down	_	_	_	_	_
c125973_g3	0.00	207.00	0.000	10.026	6.66	2.49e-06	9.29e-04	yes	up	_	_	_	_	_
c110761_g7	212.00	0.00	12.048	0.000	-6.92	2.53e-06	9.29e-04	yes	down	_	_	_	_	_
c86947_g1	212.00	0.00	9.494	0.000	-6.58	2.53e-06	9.29e-04	yes	down	_	_	_	_	_
c115505_g2	1.00	311.00	0.049	14.475	6.61	2.70e-06	9.81e-04	yes	up	_	_	_	_	_
c105990_g2	205.00	0.00	29.973	0.000	-8.23	2.85e-06	1.02e-03	yes	down	hypothetical protein M091_0855 [Parabacteroides distasonis str. 3776 D15 i]	_	_	_	_
c113488_g2	198.00	0.00	9.592	0.000	-6.60	3.22e-06	1.15e-03	yes	down	_	_	_	_	_
c119602_g4	193.00	0.00	8.272	0.000	-6.39	3.52e-06	1.24e-03	yes	down	_	_	_	_	_
c80566_g1	0.00	185.00	0.000	24.683	7.95	3.66e-06	1.27e-03	yes	up	_	_	_	_	_
c105508_g2	2.00	373.00	0.147	26.380	6.74	3.91e-06	1.35e-03	yes	up	GTPase IMAP family member 7 [Crassostrea gigas]	RecName: Full=GTPase IMAP family member 4; AltName: Full=Immunity-associated nucleotide 1 protein; Short=IAN-1; AltName: Full=Immunity-associated protein 4 [Rattus n	_	_	PF04548.13|AIG1|AIG1 family|m.23739:108-258;PF01926.20|MMR_HSR1|50S ribosome-binding GTPase|m.23739:108-198
c74556_g2	0.00	179.00	0.000	140.229	10.45	4.17e-06	1.43e-03	yes	up	_	_	_	_	_
c103948_g1	0.00	172.00	0.000	4.655	5.57	4.78e-06	1.60e-03	yes	up	_	_	_	_	_
c103767_g2	0.00	172.00	0.000	5.734	5.87	4.78e-06	1.60e-03	yes	up	_	_	_	_	_
c116391_g1	0.00	171.00	0.000	3.613	5.21	4.88e-06	1.60e-03	yes	up	_	_	_	_	_
c152525_g1	175.00	0.00	27.786	0.000	-8.12	4.88e-06	1.60e-03	yes	down	_	_	_	_	_
c73719_g1	358.00	2.00	66.214	0.352	-7.20	4.97e-06	1.62e-03	yes	down	_	_	_	_	_
c124375_g1	0.00	167.00	0.000	6.995	6.15	5.29e-06	1.71e-03	yes	up	PREDICTED: centrosomal protein of 44 kDa-like isoform X2 [Haplochromis burtoni]	RecName: Full=Deoxycytidylate deaminase; AltName: Full=dCMP deaminase [Pongo abelii]	_	comEB	PF00383.20|dCMP_cyt_deam_1|Cytidine and deoxycytidylate deaminase zinc-binding region|m.28575:45-157;PF00383.20|dCMP_cyt_deam_1|Cytidine and deoxycytidylate deaminase zinc-binding region|m.28575:224-335;PF14437.3|MafB19-deam|MafB19-like deaminase|m.28575:45-159;PF14437.3|MafB19-deam|MafB19-like deaminase|m.28575:224-337
c115093_g2	0.00	166.00	0.000	5.528	5.81	5.40e-06	1.73e-03	yes	up	_	_	_	_	_
c121509_g1	0.00	163.00	0.000	4.207	5.43	5.75e-06	1.80e-03	yes	up	PREDICTED: uncharacterized protein LOC101862849 isoform X1 [Aplysia californica]	_	_	_	_
c105340_g1	167.00	0.00	16.141	0.000	-7.34	5.75e-06	1.80e-03	yes	down	Niemann-Pick C1 protein [Crassostrea gigas]	_	_	FBLN1_2	PF07645.12|EGF_CA|Calcium-binding EGF domain|m.68471:33-76;PF07645.12|EGF_CA|Calcium-binding EGF domain|m.68471:78-115;PF07645.12|EGF_CA|Calcium-binding EGF domain|m.68471:117-157;PF12662.4|cEGF|Complement Clr-like EGF-like|m.68471:97-120
c96195_g1	166.00	0.00	12.023	0.000	-6.92	5.87e-06	1.81e-03	yes	down	_	_	_	_	_
c135413_g1	166.00	0.00	12.414	0.000	-6.97	5.87e-06	1.81e-03	yes	down	_	_	_	_	_
c70432_g1	164.00	0.00	19.452	0.000	-7.61	6.13e-06	1.87e-03	yes	down	_	_	_	_	_
c118147_g1	0.00	158.00	0.000	7.868	6.32	6.40e-06	1.93e-03	yes	up	_	_	_	_	_
c116008_g2	327.00	2.00	39.479	0.242	-6.85	6.77e-06	2.03e-03	yes	down	hypothetical protein [Clostridium butyricum]	_	_	_	_
c107093_g2	242.00	1.00	10.496	0.036	-6.28	7.07e-06	2.10e-03	yes	down	_	_	_	_	PF04970.10|LRAT|Lecithin retinol acyltransferase|m.38149:56-194
c174623_g1	156.00	0.00	5.682	0.000	-5.85	7.30e-06	2.13e-03	yes	down	_	_	_	_	_
c108008_g2	156.00	0.00	8.309	0.000	-6.39	7.30e-06	2.13e-03	yes	down	_	_	_	_	_
c125928_g1	0.00	151.00	0.000	18.233	7.52	7.47e-06	2.14e-03	yes	up	_	_	_	_	_
c115889_g1	155.00	0.00	112.059	0.000	-10.13	7.47e-06	2.14e-03	yes	down	_	_	_	_	PF07686.14|V-set|Immunoglobulin V-set domain|m.33551:40-130
c127164_g4	0.00	149.00	0.000	6.110	5.96	7.82e-06	2.23e-03	yes	up	_	_	_	_	_
c104057_g2	0.00	148.00	0.000	13.808	7.12	8.00e-06	2.26e-03	yes	up	_	_	_	_	_
c95256_g2	151.00	0.00	5.279	0.000	-5.75	8.19e-06	2.28e-03	yes	down	_	_	_	_	_
c117377_g1	386.00	3.00	18.841	0.145	-6.27	8.21e-06	2.28e-03	yes	down	_	_	_	_	_
c116718_g3	150.00	0.00	4.985	0.000	-5.67	8.38e-06	2.29e-03	yes	down	_	_	_	_	_
c79838_g2	150.00	0.00	26.979	0.000	-8.08	8.38e-06	2.29e-03	yes	down	_	_	_	_	_
c86319_g1	1.00	224.00	0.073	9.602	5.81	8.45e-06	2.29e-03	yes	up	_	_	_	_	_
c105508_g4	0.00	142.00	0.000	15.493	7.28	9.21e-06	2.48e-03	yes	up	GTPase IMAP family member 4 [Crassostrea gigas]	RecName: Full=GTPase IMAP family member 4; AltName: Full=Immunity-associated nucleotide 1 protein; Short=IAN-1; Short=hIAN1; AltName: Full=Immunity-associated prot	_	_	PF04548.13|AIG1|AIG1 family|m.9024:8-203;PF01926.20|MMR_HSR1|50S ribosome-binding GTPase|m.9024:9-130;PF02421.15|FeoB_N|Ferrous iron transport protein B|m.9024:9-143;PF04670.9|Gtr1_RagA|Gtr1/RagA G protein conserved region|m.9024:9-161
c120257_g1	294.00	2.00	6.904	0.048	-5.56	9.84e-06	2.62e-03	yes	down	_	_	_	_	_
c121193_g3	220.00	1.00	7.649	0.036	-5.83	9.88e-06	2.62e-03	yes	down	_	_	_	_	_
c112530_g1	293.00	2.00	52.504	0.339	-6.90	9.96e-06	2.62e-03	yes	down	_	_	_	_	_
c112762_g1	140.00	0.00	7.014	0.000	-6.15	1.07e-05	2.78e-03	yes	down	_	_	_	_	_
c104781_g3	138.00	0.00	12.280	0.000	-6.95	1.12e-05	2.88e-03	yes	down	_	_	_	_	_
c102987_g1	0.00	134.00	0.000	7.031	6.16	1.12e-05	2.88e-03	yes	up	L-asparaginase [Capronia coronata CBS 617.96]	_	_	ASPG	PF00710.17|Asparaginase|Asparaginase, N-terminal|m.55617:1-45
c99351_g1	22.00	1604.00	1.393	99.241	6.06	1.14e-05	2.91e-03	yes	up	_	_	_	_	_
c112192_g2	623.00	7.00	59.469	0.606	-6.40	1.16e-05	2.93e-03	yes	down	hydrolase [Capnocytophaga hypothetical protein CAPSP0001_0020 [Capnocytophaga sputigena ATCC 33612]	RecName: Full=Uncharacterized protein TC_0114	hypothetical protein	_	_
c94649_g1	0.00	130.00	0.000	8.862	6.49	1.24e-05	3.12e-03	yes	up	_	_	_	_	_
c87603_g1	5541.00	81.00	1221.378	17.069	-6.15	1.28e-05	3.19e-03	yes	down	_	_	_	_	_
c98934_g2	1.00	194.00	0.049	10.402	6.14	1.38e-05	3.42e-03	yes	up	_	_	_	_	_
c126494_g2	127.00	0.00	24.071	0.000	-7.92	1.50e-05	3.68e-03	yes	down	_	_	_	_	_
c100134_g1	125.00	0.00	12.194	0.000	-6.94	1.58e-05	3.87e-03	yes	down	_	_	_	_	_
c104087_g2	0.00	120.00	0.000	7.359	6.22	1.63e-05	3.92e-03	yes	up	_	_	_	_	_
c125021_g5	0.00	120.00	0.000	8.074	6.35	1.63e-05	3.92e-03	yes	up	_	_	_	_	_
c85798_g1	123.00	0.00	10.496	0.000	-6.73	1.68e-05	4.00e-03	yes	down	_	_	_	_	_
c102672_g1	188.00	1.00	13.661	0.073	-6.31	1.71e-05	4.07e-03	yes	down	hypothetical protein YQE_04995, partial [Dendroctonus ponderosae]	RecName: Full=Cathepsin B; Contains: RecName: Full=Cathepsin B light chain; Contains: RecName: Full=Cathepsin B heavy chain; Flags: Precursor [Sus scrofa]	_	CTSB	_
c110997_g1	119.00	0.00	4.106	0.000	-5.39	1.88e-05	4.40e-03	yes	down	_	_	_	_	PF00047.22|ig|Immunoglobulin domain|m.18585:40-133
c98672_g1	0.00	115.00	0.000	10.341	6.71	1.88e-05	4.40e-03	yes	up	_	_	_	_	_
c104879_g1	117.00	0.00	8.370	0.000	-6.40	1.99e-05	4.60e-03	yes	down	_	_	_	_	_
c120292_g1	117.00	0.00	2.554	0.000	-4.73	1.99e-05	4.60e-03	yes	down	_	_	_	_	_
c122069_g1	1.00	174.00	0.012	2.619	4.60	2.04e-05	4.67e-03	yes	up	hypothetical protein LOTGIDRAFT_238308 [Lottia gigantea]	RecName: Full=Megakaryocyte-associated tyrosine-protein kinase; AltName: Full=CSK homologous kinase; Short=CHK; AltName: Full=Hematopoietic consensus tyrosine-lackin	_	CSK	PF07714.14|Pkinase_Tyr|Protein tyrosine kinase|m.272:866-1120;PF00069.22|Pkinase|Protein kinase domain|m.272:868-1118
c73915_g2	0.00	111.00	0.000	3.358	5.11	2.18e-05	4.91e-03	yes	up	Transposase [Dicentrarchus labrax]	_	_	_	_
c94207_g1	0.00	111.00	0.000	5.152	5.71	2.18e-05	4.91e-03	yes	up	_	_	_	_	_
c116580_g3	114.00	0.00	9.653	0.000	-6.61	2.18e-05	4.91e-03	yes	down	_	_	_	_	_
c102218_g1	0.00	110.00	0.000	7.456	6.24	2.25e-05	5.03e-03	yes	up	_	_	_	_	_
c1619_g1	0.00	109.00	0.000	5.831	5.89	2.32e-05	5.12e-03	yes	up	PREDICTED: GTPase IMAP family member 7-like [Oreochromis niloticus]	_	_	_	PF04548.13|AIG1|AIG1 family|m.56030:16-218;PF01926.20|MMR_HSR1|50S ribosome-binding GTPase|m.56030:17-119
c113830_g1	0.00	109.00	0.000	4.546	5.54	2.32e-05	5.12e-03	yes	up	_	_	_	_	_
c123637_g3	52.00	2855.00	2.260	121.923	5.69	2.37e-05	5.19e-03	yes	up	PREDICTED: cytochrome P450 3A12-like [Myotis lucifugus]	_	_	CYP3A4	PF00067.19|p450|Cytochrome P450|m.40487:43-288
c119998_g1	143.00	7540.00	13.147	698.176	5.72	2.53e-05	5.48e-03	yes	up	C-type lectin A [Azumapecten farreri]	RecName: Full=Perlucin	_	MRC	PF00059.18|Lectin_C|Lectin C-type domain|m.1795:44-151
c118597_g1	0.00	106.00	0.000	2.134	4.48	2.55e-05	5.48e-03	yes	up	_	_	_	_	_
c103952_g1	108.00	0.00	6.158	0.000	-5.97	2.55e-05	5.48e-03	yes	down	_	_	_	_	_
c122499_g1	293.00	15167.00	7.930	404.855	5.66	2.62e-05	5.56e-03	yes	up	PREDICTED: cytochrome P450 3A41-like isoform X1 [Aplysia californica]	RecName: Full=Cytochrome P450 3A41 [Mus musculus]	_	CYP3A	PF00067.19|p450|Cytochrome P450|m.27910:43-504
c98482_g1	0.00	105.00	0.000	5.019	5.68	2.64e-05	5.56e-03	yes	up	_	_	_	_	_
c123819_g4	107.00	0.00	14.162	0.000	-7.16	2.64e-05	5.56e-03	yes	down	_	_	_	_	_
c113602_g1	106.00	0.00	5.437	0.000	-5.79	2.72e-05	5.70e-03	yes	down	_	_	_	_	PF13920.3|zf-C3HC4_3|Zinc finger, C3HC4 type (RING finger)|m.63195:695-736
c98775_g1	105.00	0.00	3.104	0.000	-5.00	2.81e-05	5.82e-03	yes	down	Collagen alpha-4(VI) chain [Crassostrea gigas]	_	_	_	PF00092.25|VWA|von Willebrand factor type A domain|m.5973:208-374;PF13519.3|VWA_2|von Willebrand factor type A domain|m.5973:209-316;PF01607.21|CBM_14|Chitin binding Peritrophin-A domain|m.5973:552-594
c97566_g1	105.00	0.00	6.928	0.000	-6.14	2.81e-05	5.82e-03	yes	down	_	_	_	_	_
c89928_g2	104.00	0.00	2.493	0.000	-4.70	2.91e-05	5.95e-03	yes	down	_	_	_	_	_
c76188_g1	104.00	0.00	1.967	0.000	-4.37	2.91e-05	5.95e-03	yes	down	hypothetical protein CGI_10007838 [Crassostrea gigas]	_	_	_	_
c124640_g2	29.00	1565.00	0.978	52.554	5.61	3.00e-05	6.10e-03	yes	up	_	_	_	_	_
c126801_g1	102.00	0.00	0.525	0.000	-2.64	3.11e-05	6.24e-03	yes	down	PREDICTED: E3 ubiquitin-protein ligase RNF213-like [Neolamprologus brichardi]	RecName: Full=E3 ubiquitin-protein ligase RNF213 [Mus musculus]	_	_	PF12773.4|DZR|Double zinc ribbon|m.33306:3-49
c168566_g1	102.00	0.00	12.598	0.000	-6.99	3.11e-05	6.24e-03	yes	down	_	_	_	_	_
c154770_g1	101.00	0.00	9.971	0.000	-6.65	3.21e-05	6.42e-03	yes	down	_	_	_	_	_
c95712_g1	249.00	12160.00	19.147	912.115	5.57	3.24e-05	6.42e-03	yes	up	_	_	_	_	_
c122117_g4	715.00	12.00	202.746	5.831	-5.10	3.26e-05	6.42e-03	yes	down	PREDICTED: low-density lipoprotein receptor-related protein 1-like [Strongylocentrotus purpuratus]	_	_	LRP1, CD91	_
c35844_g1	0.00	98.00	0.000	2.970	4.94	3.33e-05	6.42e-03	yes	up	PREDICTED: uncharacterized protein LOC101846070 isoform X2 [Aplysia californica]	_	_	_	_
c80599_g1	0.00	98.00	0.000	5.322	5.76	3.33e-05	6.42e-03	yes	up	_	_	_	_	_
c116202_g1	0.00	98.00	0.000	3.298	5.09	3.33e-05	6.42e-03	yes	up	_	_	_	_	_
c119160_g2	100.00	0.00	6.830	0.000	-6.11	3.33e-05	6.42e-03	yes	down	_	_	_	_	_
c117565_g1	154.00	1.00	7.392	0.048	-5.66	3.37e-05	6.46e-03	yes	down	_	_	_	_	_
c110890_g3	2.00	199.00	0.037	3.104	4.55	3.43e-05	6.50e-03	yes	up	_	_	_	_	_
c111269_g5	0.00	97.00	0.000	5.843	5.89	3.44e-05	6.50e-03	yes	up	_	_	_	_	_
c122131_g3	0.00	97.00	0.000	5.916	5.91	3.44e-05	6.50e-03	yes	up	_	_	_	_	_
c37283_g1	0.00	95.00	0.000	6.777	6.10	3.69e-05	6.93e-03	yes	up	echotoxin B1 [Monoplex echo]	RecName: Full=Echotoxin-2; Short=Echt 2; Flags: Precursor [Monoplex echo]	_	_	PF06369.9|Anemone_cytotox|Sea anemone cytotoxic protein|m.47371:89-262
c106758_g1	0.00	94.00	0.000	5.371	5.77	3.83e-05	7.14e-03	yes	up	_	_	_	_	_
c105508_g1	12.00	647.00	0.452	24.149	5.46	4.18e-05	7.75e-03	yes	up	PREDICTED: GTPase IMAP family member 4-like [Poecilia reticulata]	_	_	_	PF04548.13|AIG1|AIG1 family|m.23783:2-106
c102300_g1	193.00	2.00	52.529	0.970	-5.62	4.23e-05	7.81e-03	yes	down	_	_	_	_	_
c119590_g3	330.00	5.00	30.070	0.461	-5.75	4.42e-05	8.12e-03	yes	down	_	_	_	_	_
c105460_g2	1.00	137.00	0.049	7.286	5.63	4.57e-05	8.35e-03	yes	up	_	_	_	_	_
c108081_g1	0.00	89.00	0.000	4.110	5.40	4.60e-05	8.35e-03	yes	up	_	_	_	_	_
c63065_g2	0.00	88.00	0.000	3.213	5.05	4.77e-05	8.47e-03	yes	up	hypothetical protein CAPTEDRAFT_151195 [Capitella teleta]	RecName: Full=Calpain-9; AltName: Full=Digestive tract-specific calpain; AltName: Full=New calpain 4; Short=nCL-4 [Rattus norvegicus]	_	CAPNN	PF00648.18|Peptidase_C2|Calpain family cysteine protease|m.16846:17-314;PF01067.19|Calpain_III|Calpain large subunit, domain III|m.16846:335-470
c110090_g1	0.00	88.00	0.000	4.534	5.53	4.77e-05	8.47e-03	yes	up	_	_	_	_	_
c123819_g1	90.00	0.00	7.014	0.000	-6.15	4.77e-05	8.47e-03	yes	down	_	_	_	_	_
c86417_g1	90.00	0.00	9.518	0.000	-6.59	4.77e-05	8.47e-03	yes	down	_	_	_	_	_
c118121_g4	2574.00	54.00	138.610	4.716	-4.85	4.78e-05	8.47e-03	yes	down	_	_	_	_	_
c91047_g2	3281.00	70.00	598.318	12.269	-5.60	4.84e-05	8.53e-03	yes	down	_	_	_	_	_
c113842_g2	2.00	179.00	0.293	14.863	5.25	4.99e-05	8.75e-03	yes	up	_	_	_	_	_
c30079_g1	1.00	132.00	0.061	6.825	5.43	5.18e-05	9.02e-03	yes	up	_	_	_	_	_
c115048_g1	0.00	85.00	0.000	5.274	5.75	5.36e-05	9.15e-03	yes	up	_	_	_	_	_
c92806_g1	87.00	0.00	6.733	0.000	-6.09	5.36e-05	9.15e-03	yes	down	_	_	_	_	_
c71353_g1	87.00	0.00	6.586	0.000	-6.06	5.36e-05	9.15e-03	yes	down	_	_	_	_	_
c115720_g2	87.00	0.00	2.542	0.000	-4.72	5.36e-05	9.15e-03	yes	down	GIMAP4 [Rattus norvegicus]	RecName: Full=GTPase IMAP family member 4; AltName: Full=Immunity-associated nucleotide 1 protein; Short=IAN-1; AltName: Full=Immunity-associated protein 4 [Mus mu	_	_	PF04548.13|AIG1|AIG1 family|m.31181:35-229;PF01926.20|MMR_HSR1|50S ribosome-binding GTPase|m.31181:36-158
c123765_g2	134.00	1.00	5.401	0.036	-5.34	5.45e-05	9.26e-03	yes	down	_	_	_	_	_
c110247_g1	0.00	84.00	0.000	5.649	5.85	5.57e-05	9.34e-03	yes	up	_	_	_	_	_
c154018_g1	0.00	84.00	0.000	7.189	6.19	5.57e-05	9.34e-03	yes	up	_	_	_	_	_
c100364_g1	86.00	0.00	1.173	0.000	-3.67	5.57e-05	9.34e-03	yes	down	_	_	_	_	_
c102296_g2	19.00	883.00	1.442	65.562	5.41	5.69e-05	9.49e-03	yes	up	_	_	_	_	PF10421.6|OAS1_C|2'-5'-oligoadenylate synthetase 1, domain 2, C-terminus|m.49644:166-257;PF01909.20|NTP_transf_2|Nucleotidyltransferase domain|m.49644:44-136
c109854_g1	0.00	83.00	0.000	6.098	5.95	5.80e-05	9.57e-03	yes	up	_	_	_	_	_
c73508_g2	85.00	0.00	32.636	0.000	-8.35	5.80e-05	9.57e-03	yes	down	_	_	_	_	_
c129468_g1	0.00	82.00	0.000	6.049	5.94	6.04e-05	9.92e-03	yes	up	_	_	_	_	_
c107968_g2	0.00	80.00	0.000	16.124	7.34	6.56e-05	1.06e-02	yes	up	Duodenase-1 precursor [Rana catesbeiana]	RecName: Full=Myeloblastin; AltName: Full=AGP7; AltName: Full=C-ANCA antigen; AltName: Full=Leukocyte proteinase 3; Short=PR-3; Short=PR3; AltName: Full=Neutrophil	_	GZMA	PF00089.23|Trypsin|Trypsin|m.78308:49-174
c107957_g2	0.00	80.00	0.000	29.653	8.22	6.56e-05	1.06e-02	yes	up	_	_	_	_	_
c112192_g1	82.00	0.00	20.222	0.000	-7.67	6.56e-05	1.06e-02	yes	down	hypothetical protein [Clostridium carboxidivorans]	_	_	_	_
c65386_g1	81.00	0.00	4.338	0.000	-5.47	6.84e-05	1.09e-02	yes	down	hypothetical protein CGI_10028835 [Crassostrea gigas]	RecName: Full=Tumor susceptibility gene 101 protein; AltName: Full=ESCRT-I complex subunit TSG101 [Homo sapiens]	_	TSG101, STP22, VPS23	PF05743.10|UEV|UEV domain|m.75260:25-144
c111123_g1	81.00	0.00	6.781	0.000	-6.10	6.84e-05	1.09e-02	yes	down	_	_	_	_	_
c166219_g1	81.00	0.00	16.984	0.000	-7.42	6.84e-05	1.09e-02	yes	down	_	_	_	_	_
c12186_g1	81.00	0.00	24.450	0.000	-7.94	6.84e-05	1.09e-02	yes	down	hypothetical protein [Prevotella sp. oral taxon 473]	_	_	_	_
c96847_g1	0.00	77.00	0.000	7.310	6.21	7.44e-05	1.17e-02	yes	up	_	_	_	_	_
c111266_g6	79.00	0.00	10.557	0.000	-6.74	7.44e-05	1.17e-02	yes	down	_	_	_	_	_
c123637_g1	113.00	4312.00	7.087	263.850	5.20	7.71e-05	1.20e-02	yes	up	PREDICTED: cytochrome P450 3A41-like [Aplysia californica]	RecName: Full=Cytochrome P450 3A41 [Mus musculus]	_	TBXAS1, CYP5A	PF00067.19|p450|Cytochrome P450|m.24944:2-160
c90400_g1	438.00	9.00	74.364	1.467	-5.57	7.74e-05	1.20e-02	yes	down	_	_	_	_	_
c90601_g1	78.00	0.00	4.252	0.000	-5.44	7.77e-05	1.20e-02	yes	down	_	_	_	_	_
c106150_g1	78.00	0.00	2.102	0.000	-4.46	7.77e-05	1.20e-02	yes	down	PREDICTED: cubilin [Otolemur garnettii]	_	_	_	PF00431.17|CUB|CUB domain|m.26470:2-82;PF00431.17|CUB|CUB domain|m.26470:116-214
c96847_g4	0.00	75.00	0.000	6.086	5.95	8.12e-05	1.24e-02	yes	up	_	_	_	_	_
c97303_g1	77.00	0.00	11.095	0.000	-6.81	8.12e-05	1.24e-02	yes	down	_	_	_	_	PF04548.13|AIG1|AIG1 family|m.46778:1-164
c105030_g3	77.00	0.00	23.008	0.000	-7.85	8.12e-05	1.24e-02	yes	down	_	_	_	_	_
c124547_g1	1.00	115.00	0.024	2.122	4.16	8.20e-05	1.25e-02	yes	up	_	_	_	_	PF00791.17|ZU5|ZU5 domain|m.50856:460-554
c123637_g4	65.00	2467.00	3.592	133.477	5.18	8.31e-05	1.26e-02	yes	up	hypothetical protein LOTGIDRAFT_223980 [Lottia gigantea]	RecName: Full=Lithocholate 6-beta-hydroxylase; Short=6 beta-hydroxylase; AltName: Full=CYPIIIA10; AltName: Full=Cytochrome P450 3A10	_	CYP3C	PF00067.19|p450|Cytochrome P450|m.31536:42-287
c73086_g2	76.00	0.00	7.502	0.000	-6.25	8.49e-05	1.28e-02	yes	down	_	_	_	_	_
c102543_g1	75.00	0.00	6.500	0.000	-6.04	8.88e-05	1.33e-02	yes	down	_	_	_	_	_
c72975_g1	73.00	0.00	5.425	0.000	-5.79	9.73e-05	1.42e-02	yes	down	_	_	_	_	_
c104879_g2	73.00	0.00	16.728	0.000	-7.39	9.73e-05	1.42e-02	yes	down	_	_	_	_	PF07686.14|V-set|Immunoglobulin V-set domain|m.59003:38-125
c110695_g2	73.00	0.00	6.610	0.000	-6.07	9.73e-05	1.42e-02	yes	down	_	_	_	_	_
c34459_g1	0.00	71.00	0.000	5.128	5.71	9.73e-05	1.42e-02	yes	up	_	_	_	_	_
c101020_g1	0.00	71.00	0.000	7.092	6.17	9.73e-05	1.42e-02	yes	up	17-beta-hydroxysteroid dehydrogenase type 12 [Nucella lapillus]	RecName: Full=Estradiol 17-beta-dehydrogenase 12; AltName: Full=17-beta-hydroxysteroid dehydrogenase 12; Short=17-beta-HSD 12; AltName: Full=3-ketoacyl-CoA reduct	_	HSD17B12, KAR, IFA38	PF00106.22|adh_short|short chain dehydrogenase|m.23885:16-153;PF13561.3|adh_short_C2|Enoyl-(Acyl carrier protein) reductase|m.23885:24-153
c119774_g8	0.00	71.00	0.000	1.843	4.28	9.73e-05	1.42e-02	yes	up	_	_	_	_	PF08205.9|C2-set_2|CD80-like C2-set immunoglobulin domain|m.53822:184-267
c87474_g1	72.00	0.00	3.458	0.000	-5.15	1.02e-04	1.48e-02	yes	down	_	_	_	_	_
c142676_g1	72.00	0.00	3.629	0.000	-5.22	1.02e-04	1.48e-02	yes	down	_	_	_	_	_
c120302_g1	108.00	3824.00	3.580	125.087	5.09	1.03e-04	1.48e-02	yes	up	PREDICTED: sulfotransferase family cytosolic 1B member 1-like [Aplysia californica]	RecName: Full=Sulfotransferase family cytosolic 1B member 1; Short=ST1B1; Short=Sulfotransferase 1B1	_	_	PF00685.24|Sulfotransfer_1|Sulfotransferase domain|m.21836:67-310
c81483_g1	71.00	0.00	2.419	0.000	-4.65	1.07e-04	1.53e-02	yes	down	_	_	_	_	_
c181901_g1	71.00	0.00	10.911	0.000	-6.78	1.07e-04	1.53e-02	yes	down	_	_	_	_	_
c122117_g3	5548.00	152.00	252.049	6.971	-5.16	1.07e-04	1.53e-02	yes	down	_	_	_	_	PF01683.15|EB|EB module|m.364:47-90
c119166_g1	290.00	6.00	12.194	0.267	-5.07	1.08e-04	1.54e-02	yes	down	hypothetical protein LOTGIDRAFT_229551 [Lottia gigantea]	_	_	_	PF04749.14|PLAC8|PLAC8 family|m.18575:23-108
c126801_g5	70.00	0.00	0.855	0.000	-3.26	1.12e-04	1.58e-02	yes	down	hypothetical protein LOTGIDRAFT_232244 [Lottia gigantea]	_	_	_	_
c90486_g1	70.00	0.00	4.680	0.000	-5.58	1.12e-04	1.58e-02	yes	down	_	_	_	_	_
c113551_g1	20.00	758.00	1.161	42.819	5.09	1.12e-04	1.58e-02	yes	up	_	_	_	_	_
c121159_g1	69.00	0.00	2.004	0.000	-4.40	1.18e-04	1.64e-02	yes	down	_	_	_	_	_
c36013_g1	0.00	67.00	0.000	1.746	4.21	1.18e-04	1.64e-02	yes	up	Receptor-type tyrosine-protein phosphatase kappa [Crassostrea gigas]	_	_	_	PF00102.24|Y_phosphatase|Protein-tyrosine phosphatase|m.41266:1-61;PF00102.24|Y_phosphatase|Protein-tyrosine phosphatase|m.41266:119-349
c153859_g1	68.00	0.00	82.733	0.000	-9.69	1.24e-04	1.70e-02	yes	down	_	_	_	_	_
c93477_g1	68.00	0.00	11.901	0.000	-6.91	1.24e-04	1.70e-02	yes	down	Fibrillin-1 [Crassostrea gigas]	_	_	FBLN1_2	PF07974.10|EGF_2|EGF-like domain|m.7354:75-114
c79864_g2	0.00	66.00	0.000	4.825	5.62	1.24e-04	1.70e-02	yes	up	_	_	_	_	_
c111574_g1	140.00	2.00	7.796	0.109	-5.24	1.25e-04	1.71e-02	yes	down	_	_	_	_	_
c114284_g3	7.00	301.00	5.731	222.413	5.25	1.29e-04	1.75e-02	yes	up	PREDICTED: deleted in malignant brain tumors 1 protein-like, partial [Amphimedon queenslandica]	_	_	_	PF00530.15|SRCR|Scavenger receptor cysteine-rich domain|m.67391:3-95
c122953_g2	67.00	0.00	4.509	0.000	-5.53	1.30e-04	1.75e-02	yes	down	_	_	_	_	PF00041.18|fn3|Fibronectin type III domain|m.14927:75-182;PF00041.18|fn3|Fibronectin type III domain|m.14927:196-289
c126086_g1	0.00	65.00	0.000	3.588	5.20	1.30e-04	1.75e-02	yes	up	_	_	_	_	_
c185241_g1	0.00	65.00	0.000	2.643	4.78	1.30e-04	1.75e-02	yes	up	_	_	_	_	_
c107968_g1	476.00	12.00	46.211	1.091	-5.28	1.31e-04	1.75e-02	yes	down	PREDICTED: granzyme A-like isoform X3 [Poecilia formosa]	_	_	CTSG	PF00089.23|Trypsin|Trypsin|m.50538:48-239
c108100_g1	409.00	13153.00	15.542	490.481	4.97	1.33e-04	1.77e-02	yes	up	hypothetical protein LOTGIDRAFT_225865 [Lottia gigantea]	RecName: Full=Aldose reductase-related protein 2; Short=AR; AltName: Full=Aldehyde reductase; AltName: Full=Aldo-keto reductase	_	E1.1.1.21, AKR1	PF00248.18|Aldo_ket_red|Aldo/keto reductase family|m.2645:19-296
c116231_g1	1.00	100.00	0.024	3.491	4.86	1.35e-04	1.78e-02	yes	up	_	_	_	_	_
c107473_g1	1.00	100.00	0.147	12.984	5.73	1.35e-04	1.78e-02	yes	up	_	_	_	_	_
c119498_g2	66.00	0.00	2.505	0.000	-4.70	1.37e-04	1.79e-02	yes	down	_	_	_	_	_
c65332_g1	0.00	64.00	0.000	2.764	4.84	1.37e-04	1.79e-02	yes	up	_	_	_	_	_
c111204_g1	0.00	64.00	0.000	7.735	6.29	1.37e-04	1.79e-02	yes	up	_	_	_	_	_
c77239_g1	2.00	132.00	0.232	13.772	5.38	1.38e-04	1.81e-02	yes	up	PREDICTED: LOW QUALITY PROTEIN: phospholipid hydroperoxide glutathione peroxidase, mitochondrial-like [Saccoglossus kowalevskii]	RecName: Full=Glutathione peroxidase; Short=GPX [Schistosoma mansoni]	_	E1.11.1.9	_
c119775_g3	65.00	0.00	4.716	0.000	-5.59	1.44e-04	1.83e-02	yes	down	_	_	_	_	_
c110834_g2	65.00	0.00	7.026	0.000	-6.16	1.44e-04	1.83e-02	yes	down	_	_	_	_	_
c104103_g1	65.00	0.00	7.343	0.000	-6.22	1.44e-04	1.83e-02	yes	down	_	_	_	_	_
c96550_g1	65.00	0.00	2.859	0.000	-4.89	1.44e-04	1.83e-02	yes	down	_	_	_	_	_
c103567_g2	65.00	0.00	2.419	0.000	-4.65	1.44e-04	1.83e-02	yes	down	_	_	_	_	_
c101139_g1	65.00	0.00	3.739	0.000	-5.26	1.44e-04	1.83e-02	yes	down	PREDICTED: GTPase IMAP family member 8-like [Lepisosteus oculatus]	_	_	_	PF04548.13|AIG1|AIG1 family|m.72984:44-274;PF01926.20|MMR_HSR1|50S ribosome-binding GTPase|m.72984:44-181;PF00350.20|Dynamin_N|Dynamin family|m.72984:106-188
c114903_g1	0.00	63.00	0.000	5.092	5.70	1.44e-04	1.83e-02	yes	up	_	_	_	_	_
c125134_g1	495.00	13.00	4.338	0.109	-4.41	1.45e-04	1.83e-02	yes	down	_	_	_	_	_
c98098_g1	526.00	14.00	46.236	1.200	-5.16	1.46e-04	1.84e-02	yes	down	_	_	_	_	_
c120982_g1	64.00	0.00	4.924	0.000	-5.65	1.52e-04	1.91e-02	yes	down	_	_	_	_	_
c117757_g1	390.00	10.00	9.054	0.388	-4.23	1.53e-04	1.92e-02	yes	down	_	_	_	_	_
c122224_g2	63.00	0.00	3.360	0.000	-5.11	1.60e-04	1.99e-02	yes	down	_	_	_	_	_
c122314_g2	63.00	0.00	4.069	0.000	-5.38	1.60e-04	1.99e-02	yes	down	_	_	_	_	_
c124958_g1	0.00	60.00	0.000	1.515	4.01	1.69e-04	2.09e-02	yes	up	_	_	_	_	_
c123294_g3	49.00	1513.00	2.590	78.280	4.86	1.71e-04	2.11e-02	yes	up	_	_	_	_	_
c185056_g1	1.00	92.00	3.715	282.229	6.21	1.77e-04	2.18e-02	yes	up	_	_	_	_	_
c115644_g1	61.00	0.00	3.165	0.000	-5.03	1.78e-04	2.18e-02	yes	down	RNAase [Paenibacillus sp. hypothetical protein WG8_3693 [Paenibacillus sp. Aloe-11]	_	_	_	_
c124547_g3	0.00	59.00	0.000	2.764	4.84	1.78e-04	2.18e-02	yes	up	_	_	_	_	_
c31915_g1	60.00	0.00	2.236	0.000	-4.55	1.89e-04	2.28e-02	yes	down	_	_	_	_	_
c105765_g1	0.00	58.00	0.000	13.627	7.10	1.89e-04	2.28e-02	yes	up	_	_	_	_	_
c114929_g1	154.00	3.00	4.912	0.291	-3.68	1.91e-04	2.31e-02	yes	down	_	_	_	_	_
c94985_g1	12.00	411.00	1.540	50.966	4.96	1.96e-04	2.35e-02	yes	up	_	_	_	_	_
c105340_g2	58.00	0.00	13.001	0.000	-7.03	2.11e-04	2.48e-02	yes	down	PREDICTED: uncharacterized protein LOC101849279 [Aplysia californica]	_	_	FBLN1_2	PF14670.3|FXa_inhibition|Coagulation Factor Xa inhibitory site|m.65287:39-74;PF14670.3|FXa_inhibition|Coagulation Factor Xa inhibitory site|m.65287:124-160;PF07645.12|EGF_CA|Calcium-binding EGF domain|m.65287:3-27;PF07645.12|EGF_CA|Calcium-binding EGF domain|m.65287:35-74;PF00008.24|EGF|EGF-like domain|m.65287:3-27
c107944_g1	58.00	0.00	3.177	0.000	-5.03	2.11e-04	2.48e-02	yes	down	_	_	_	_	_
c106112_g1	58.00	0.00	2.212	0.000	-4.53	2.11e-04	2.48e-02	yes	down	_	_	_	_	_
c94951_g1	58.00	0.00	3.800	0.000	-5.29	2.11e-04	2.48e-02	yes	down	_	_	_	_	_
c148779_g1	0.00	56.00	0.000	5.965	5.92	2.11e-04	2.48e-02	yes	up	_	_	_	_	_
c114478_g3	0.00	56.00	0.000	5.371	5.77	2.11e-04	2.48e-02	yes	up	_	_	_	_	_
c94092_g1	0.00	56.00	0.000	2.570	4.74	2.11e-04	2.48e-02	yes	up	_	_	_	_	_
c127770_g2	2.00	116.00	0.037	2.194	4.07	2.12e-04	2.48e-02	yes	up	_	_	_	_	_
c110191_g4	89.00	1.00	5.792	0.061	-5.19	2.13e-04	2.49e-02	yes	down	_	_	_	_	_
c111074_g2	6.00	230.00	0.208	7.977	4.71	2.16e-04	2.52e-02	yes	up	Tryptase [Crassostrea gigas]	_	_	_	PF00651.28|BTB|BTB/POZ domain|m.41024:16-119
c117746_g2	46.00	1319.00	2.517	70.691	4.76	2.21e-04	2.54e-02	yes	up	_	_	_	_	_
c126023_g6	88.00	1.00	2.468	0.024	-4.37	2.21e-04	2.54e-02	yes	down	_	_	_	_	_
c112057_g2	57.00	0.00	2.334	0.000	-4.61	2.24e-04	2.54e-02	yes	down	PREDICTED: uncharacterized protein LOC101862849 isoform X1 [Aplysia californica]	_	_	_	_
c119676_g1	57.00	0.00	7.551	0.000	-6.26	2.24e-04	2.54e-02	yes	down	_	_	_	_	_
c121441_g6	0.00	55.00	0.000	7.019	6.15	2.24e-04	2.54e-02	yes	up	_	_	_	_	_
c59586_g1	0.00	55.00	0.000	2.643	4.78	2.24e-04	2.54e-02	yes	up	Actin, clone 403 [Acromyrmex echinatior]	RecName: Full=Putative actin-23 [Dictyostelium discoideum]	_	ACTF	PF00022.16|Actin|Actin|m.76003:1-32;PF00022.16|Actin|Actin|m.76003:39-320
c88730_g1	0.00	55.00	0.000	25.459	8.00	2.24e-04	2.54e-02	yes	up	_	_	_	_	_
c124654_g1	56.00	0.00	1.686	0.000	-4.16	2.37e-04	2.66e-02	yes	down	_	_	_	_	_
c64819_g1	56.00	0.00	5.144	0.000	-5.71	2.37e-04	2.66e-02	yes	down	_	_	_	_	PF04970.10|LRAT|Lecithin retinol acyltransferase|m.7267:4-49
c120627_g1	56.00	0.00	24.376	0.000	-7.94	2.37e-04	2.66e-02	yes	down	_	_	_	_	_
c101300_g2	0.00	54.00	0.000	4.583	5.55	2.37e-04	2.66e-02	yes	up	_	_	_	_	_
c110191_g3	55.00	0.00	3.910	0.000	-5.33	2.52e-04	2.79e-02	yes	down	_	_	_	_	_
c114929_g3	55.00	0.00	2.285	0.000	-4.58	2.52e-04	2.79e-02	yes	down	_	_	_	_	_
c75344_g1	55.00	0.00	16.801	0.000	-7.40	2.52e-04	2.79e-02	yes	down	_	_	_	_	_
c82368_g1	0.00	53.00	0.000	45.802	8.84	2.52e-04	2.79e-02	yes	up	PREDICTED: low-density lipoprotein receptor-related protein 1-like [Oryzias latipes]	_	_	LRP1, CD91	_
c121441_g4	54.00	0.00	5.633	0.000	-5.84	2.68e-04	2.90e-02	yes	down	_	_	_	_	_
c122361_g3	54.00	0.00	8.907	0.000	-6.49	2.68e-04	2.90e-02	yes	down	PREDICTED: uncharacterized protein LOC101851650 [Aplysia californica]	_	_	_	PF00386.18|C1q|C1q domain|m.28855:72-196
c103384_g2	54.00	0.00	2.285	0.000	-4.58	2.68e-04	2.90e-02	yes	down	_	_	_	_	PF13424.3|TPR_12|Tetratricopeptide repeat|m.16110:389-460;PF13374.3|TPR_10|Tetratricopeptide repeat|m.16110:390-422;PF13181.3|TPR_8|Tetratricopeptide repeat|m.16110:260-289;PF13181.3|TPR_8|Tetratricopeptide repeat|m.16110:391-420
c108728_g1	54.00	0.00	4.069	0.000	-5.38	2.68e-04	2.90e-02	yes	down	_	_	_	_	_
c106662_g1	0.00	52.00	0.000	5.334	5.76	2.68e-04	2.90e-02	yes	up	_	_	_	_	_
c37396_g1	0.00	52.00	0.000	2.946	4.93	2.68e-04	2.90e-02	yes	up	_	_	_	_	_
c95205_g1	0.00	52.00	0.000	11.784	6.89	2.68e-04	2.90e-02	yes	up	_	_	_	_	_
c105553_g1	1.00	81.00	0.086	6.765	5.21	2.69e-04	2.90e-02	yes	up	_	_	_	_	_
c79618_g1	53.00	0.00	2.419	0.000	-4.65	2.85e-04	3.06e-02	yes	down	_	_	_	_	_
c48601_g1	0.00	51.00	0.000	7.322	6.21	2.85e-04	3.06e-02	yes	up	_	_	_	_	_
c126494_g1	163.00	4.00	3.861	0.085	-4.42	2.88e-04	3.08e-02	yes	down	_	_	_	_	_
c102441_g2	896.00	32.00	64.857	4.170	-3.93	3.01e-04	3.18e-02	yes	down	PREDICTED: galactose-specific lectin nattectin-like [Poecilia reticulata]	_	_	CD207	PF00059.18|Lectin_C|Lectin C-type domain|m.28691:49-154
c104683_g1	52.00	0.00	7.453	0.000	-6.24	3.04e-04	3.18e-02	yes	down	_	_	_	_	_
c111266_g4	52.00	0.00	13.661	0.000	-7.10	3.04e-04	3.18e-02	yes	down	_	_	_	_	_
c113633_g1	0.00	50.00	0.000	2.437	4.67	3.04e-04	3.18e-02	yes	up	_	_	_	_	_
c111266_g5	0.00	50.00	0.000	6.983	6.15	3.04e-04	3.18e-02	yes	up	_	_	_	_	_
c101172_g1	0.00	50.00	0.000	3.843	5.30	3.04e-04	3.18e-02	yes	up	_	_	_	_	PF00629.20|MAM|MAM domain, meprin/A5/mu|m.48765:37-181
c108107_g1	0.00	50.00	0.000	5.249	5.74	3.04e-04	3.18e-02	yes	up	_	_	_	_	_
c104217_g1	2.00	103.00	0.098	5.189	4.74	3.23e-04	3.33e-02	yes	up	_	_	_	_	_
c128594_g1	122.00	3048.00	2.688	65.526	4.56	3.24e-04	3.33e-02	yes	up	_	_	_	_	_
c121084_g2	51.00	0.00	5.169	0.000	-5.72	3.24e-04	3.33e-02	yes	down	_	_	_	_	_
c113606_g2	0.00	49.00	0.000	5.880	5.90	3.24e-04	3.33e-02	yes	up	_	_	_	_	_
c2383_g1	0.00	49.00	0.000	6.765	6.10	3.24e-04	3.33e-02	yes	up	_	_	_	_	_
c111269_g2	183.00	5.00	5.865	0.194	-4.34	3.24e-04	3.33e-02	yes	down	_	_	_	_	_
c93827_g1	15.00	426.00	0.464	12.838	4.52	3.31e-04	3.38e-02	yes	up	_	_	_	_	_
c100046_g1	78.00	1.00	47.849	0.242	-7.13	3.32e-04	3.38e-02	yes	down	PREDICTED: hypothetical protein LOC100635358 [Amphimedon queenslandica]	RecName: Full=Angiopoietin-2; Short=ANG-2; Flags: Precursor [Canis lupus familiaris]	_	_	PF00147.15|Fibrinogen_C|Fibrinogen beta and gamma chains, C-terminal globular domain|m.62760:107-159
c84776_g1	50.00	0.00	5.877	0.000	-5.90	3.46e-04	3.50e-02	yes	down	_	_	_	_	_
c123055_g1	50.00	0.00	7.417	0.000	-6.23	3.46e-04	3.50e-02	yes	down	_	_	_	_	_
c32500_g1	50.00	0.00	2.615	0.000	-4.76	3.46e-04	3.50e-02	yes	down	Mn-containing catalase [Burkholderia sordidicola]	RecName: Full=Uncharacterized protein YjqC [Bacillus subtilis subsp. subtilis str. 168]	Mn-containing catalase	K07217	PF05067.9|Mn_catalase|Manganese containing catalase|m.12953:1-296
c119775_g1	35.00	897.00	1.405	28.732	4.26	3.64e-04	3.67e-02	yes	up	_	_	_	_	_
c90490_g1	49.00	0.00	5.645	0.000	-5.84	3.70e-04	3.70e-02	yes	down	_	_	_	_	_
c106880_g2	0.00	47.00	0.000	11.299	6.83	3.70e-04	3.70e-02	yes	up	_	_	_	_	PF15008.3|DUF4518|Domain of unknown function (DUF4518)|m.69662:3-117
c108123_g1	0.00	47.00	0.000	3.649	5.23	3.70e-04	3.70e-02	yes	up	_	_	_	_	_
c112036_g1	184.00	4399.00	4.778	112.273	4.53	3.75e-04	3.73e-02	yes	up	PREDICTED: cytochrome P450 3A8-like isoform X1 [Aplysia californica]	_	_	CYP9	PF00067.19|p450|Cytochrome P450|m.40877:43-302;PF00067.19|p450|Cytochrome P450|m.40877:316-505
c119977_g2	225.00	7.00	11.852	0.364	-4.69	3.75e-04	3.73e-02	yes	down	PREDICTED: HRAS-like suppressor 3-like, partial [Saccoglossus kowalevskii]	RecName: Full=HRAS-like suppressor 2 [Homo sapiens]	_	KLHL24_35	PF04970.10|LRAT|Lecithin retinol acyltransferase|m.5441:17-129;PF00877.16|NLPC_P60|NlpC/P60 family|m.5441:5-55
c119556_g1	100.00	2.00	3.653	0.242	-3.46	3.80e-04	3.76e-02	yes	down	pol polyprotein [Drosophila buzzatii]	_	_	_	PF02023.14|SCAN|SCAN domain|m.5036:199-285;PF00098.20|zf-CCHC|Zinc knuckle|m.5036:343-359
c117746_g1	22.00	573.00	3.189	80.256	4.61	3.86e-04	3.81e-02	yes	up	_	_	_	_	_
c123200_g3	48.00	0.00	3.006	0.000	-4.96	3.96e-04	3.85e-02	yes	down	_	_	_	_	_
c71643_g1	48.00	0.00	3.568	0.000	-5.20	3.96e-04	3.85e-02	yes	down	_	_	_	_	PF16101.2|PRIMA1|Proline-rich membrane anchor 1|m.78806:170-236
c113073_g2	48.00	0.00	1.185	0.000	-3.68	3.96e-04	3.85e-02	yes	down	_	_	_	_	_
c74795_g1	48.00	0.00	6.671	0.000	-6.08	3.96e-04	3.85e-02	yes	down	PREDICTED: lactose-binding lectin l-2-like [Xiphophorus maculatus]	RecName: Full=Perlucin	_	MRC	PF00059.18|Lectin_C|Lectin C-type domain|m.11067:69-175;PF05473.9|UL45|UL45 protein, carbohydrate-binding C-type lectin-like|m.11067:39-94
c123538_g2	0.00	46.00	0.000	2.497	4.70	3.96e-04	3.85e-02	yes	up	_	_	_	_	PF07686.14|V-set|Immunoglobulin V-set domain|m.38196:87-182
c82196_g1	0.00	46.00	0.000	1.988	4.38	3.96e-04	3.85e-02	yes	up	_	_	_	_	_
c122976_g2	98.00	2.00	4.264	0.061	-4.76	4.06e-04	3.92e-02	yes	down	_	_	_	_	_
c106237_g4	98.00	2.00	37.365	0.715	-5.52	4.06e-04	3.92e-02	yes	down	putative uncharacterized protein [Azospirillum sp. CAG:260]	_	hypothetical protein	_	_
c66034_g1	5.00	166.00	0.440	14.378	4.74	4.15e-04	4.00e-02	yes	up	_	_	_	_	_
c111925_g1	47.00	0.00	3.470	0.000	-5.16	4.25e-04	4.06e-02	yes	down	hypothetical protein X777_11230 [Cerapachys biroi]	_	_	_	_
c79596_g2	0.00	45.00	0.000	2.364	4.62	4.25e-04	4.06e-02	yes	up	_	_	_	_	_
c125669_g1	86.00	2005.00	1.796	41.195	4.44	4.26e-04	4.07e-02	yes	up	hypothetical protein LOTGIDRAFT_196500 [Lottia gigantea]	_	_	CYP1A1	PF00067.19|p450|Cytochrome P450|m.69890:56-515
c107810_g2	519.00	20.00	45.625	1.709	-4.66	4.41e-04	4.20e-02	yes	down	perlucin A2 protein precursor [Haliotis laevigata]	RecName: Full=Perlucin	_	AGC1, CSPG1	PF00059.18|Lectin_C|Lectin C-type domain|m.34747:42-147;PF05473.9|UL45|UL45 protein, carbohydrate-binding C-type lectin-like|m.34747:2-85
c109991_g1	6.00	185.00	0.550	16.560	4.68	4.43e-04	4.20e-02	yes	up	_	_	_	_	PF01683.15|EB|EB module|m.41892:14-60
c104039_g1	143.00	4.00	7.062	0.194	-4.61	4.48e-04	4.23e-02	yes	down	PREDICTED: SCO-spondin-like [Aplysia californica]	RecName: Full=SCO-spondin; Flags: Precursor [Gallus gallus]	_	_	PF00094.22|VWD|von Willebrand factor type D domain|m.27218:87-238;PF08742.8|C8|C8 domain|m.27218:280-344;PF01826.14|TIL|Trypsin Inhibitor like cysteine rich domain|m.27218:348-400
c112236_g3	166.00	5.00	8.309	0.315	-4.34	4.50e-04	4.23e-02	yes	down	_	_	_	_	_
c103555_g1	95.00	2.00	4.277	0.109	-4.39	4.50e-04	4.23e-02	yes	down	skin mucus lectin [Leiognathus nuchalis]	_	_	MRC	PF02140.15|Gal_Lectin|Galactose binding lectin domain|m.20353:128-208
c124803_g1	190.00	6.00	3.372	0.109	-4.05	4.51e-04	4.23e-02	yes	down	_	_	_	_	_
c95797_g1	46.00	0.00	2.835	0.000	-4.88	4.56e-04	4.23e-02	yes	down	_	_	_	_	PF04548.13|AIG1|AIG1 family|m.8062:7-188
c11135_g1	46.00	0.00	2.175	0.000	-4.51	4.56e-04	4.23e-02	yes	down	_	_	_	_	_
c61950_g1	46.00	0.00	2.285	0.000	-4.58	4.56e-04	4.23e-02	yes	down	PREDICTED: complement receptor type 1-like [Ciona intestinalis]	_	_	_	PF00092.25|VWA|von Willebrand factor type A domain|m.12422:36-217;PF00084.17|Sushi|Sushi repeat (SCR repeat)|m.12422:313-369
c122131_g4	0.00	44.00	0.000	5.286	5.75	4.56e-04	4.23e-02	yes	up	_	_	_	_	_
c113551_g2	115.00	2581.00	4.802	105.702	4.43	4.64e-04	4.30e-02	yes	up	Sulfotransferase family cytosolic 1B member 1 [Crassostrea gigas]	RecName: Full=Estrogen sulfotransferase; AltName: Full=Sulfotransferase 1E1; Short=ST1E1; AltName: Full=Sulfotransferase, estrogen-preferring	_	SULT2B1	PF00685.24|Sulfotransfer_1|Sulfotransferase domain|m.59174:87-320;PF13469.3|Sulfotransfer_3|Sulfotransferase family|m.59174:159-255
c103785_g1	45.00	0.00	2.713	0.000	-4.81	4.90e-04	4.47e-02	yes	down	_	_	_	_	_
c71934_g1	45.00	0.00	2.505	0.000	-4.70	4.90e-04	4.47e-02	yes	down	_	_	_	_	_
c115022_g1	45.00	0.00	1.307	0.000	-3.81	4.90e-04	4.47e-02	yes	down	_	_	_	_	_
c84218_g1	0.00	43.00	0.000	2.158	4.50	4.90e-04	4.47e-02	yes	up	_	_	_	_	_
c109345_g1	0.00	43.00	0.000	1.273	3.78	4.90e-04	4.47e-02	yes	up	_	_	_	_	_
c113013_g1	525.00	21.00	27.981	3.831	-2.84	4.91e-04	4.47e-02	yes	down	_	_	_	_	PF04970.10|LRAT|Lecithin retinol acyltransferase|m.74716:18-151
c103987_g3	1.00	67.00	0.037	2.461	4.22	4.98e-04	4.53e-02	yes	up	_	_	_	_	_
c110348_g1	2.00	90.00	0.134	3.892	4.09	5.01e-04	4.54e-02	yes	up	Multiple epidermal growth factor-like domains 11 [Crassostrea gigas]	RecName: Full=Multiple epidermal growth factor-like domains protein 10; Short=Multiple EGF-like domains protein 10; Flags: Precursor [Homo sapiens]	_	_	PF00053.21|Laminin_EGF|Laminin EGF domain|m.48689:75-115;PF00053.21|Laminin_EGF|Laminin EGF domain|m.48689:167-210
c114888_g2	68.00	1.00	3.348	0.048	-4.54	5.23e-04	4.72e-02	yes	down	_	_	_	_	_
c98722_g1	44.00	0.00	1.650	0.000	-4.13	5.28e-04	4.72e-02	yes	down	_	_	_	_	_
c24990_g1	44.00	0.00	295.964	0.000	-11.53	5.28e-04	4.72e-02	yes	down	hypothetical protein [uncultured gamma proteobacterium HF0010_05D02]	_	_	_	_
c69251_g1	44.00	0.00	56.084	0.000	-9.13	5.28e-04	4.72e-02	yes	down	_	_	_	_	_
c120262_g6	44.00	0.00	2.016	0.000	-4.40	5.28e-04	4.72e-02	yes	down	_	_	_	_	_
c129406_g1	3626.00	160.00	66.495	2.885	-4.48	5.33e-04	4.75e-02	yes	down	_	_	_	_	_
c103079_g1	43.00	0.00	5.486	0.000	-5.80	5.69e-04	4.96e-02	yes	down	_	_	_	_	PF15633.3|Tox-ART-HYD1|HYD1 signature containing ADP-ribosyltransferase|m.66228:7-101
c105102_g1	43.00	0.00	4.142	0.000	-5.41	5.69e-04	4.96e-02	yes	down	_	_	_	_	_
c81339_g1	43.00	0.00	4.558	0.000	-5.54	5.69e-04	4.96e-02	yes	down	_	_	_	_	_
c111574_g5	43.00	0.00	4.851	0.000	-5.63	5.69e-04	4.96e-02	yes	down	_	_	_	_	_
c14818_g1	43.00	0.00	1.491	0.000	-3.99	5.69e-04	4.96e-02	yes	down	_	_	_	_	_
c93295_g1	0.00	41.00	0.000	1.940	4.35	5.69e-04	4.96e-02	yes	up	_	_	_	_	_
c116595_g4	0.00	41.00	0.000	2.025	4.41	5.69e-04	4.96e-02	yes	up	PREDICTED: uncharacterized protein LOC578054 [Strongylocentrotus purpuratus]	_	similar to zinc finger protein	_	PF00665.23|rve|Integrase core domain|m.9058:84-196;PF09337.7|zf-H2C2|His(2)-Cys(2) zinc finger|m.9058:27-63
c117707_g1	0.00	41.00	0.000	2.328	4.60	5.69e-04	4.96e-02	yes	up	_	_	_	_	_
c91491_g2	0.00	41.00	0.000	2.025	4.41	5.69e-04	4.96e-02	yes	up	PREDICTED: uncharacterized protein LOC754648 [Strongylocentrotus purpuratus]	RecName: Full=Retrovirus-related Pol polyprotein from transposon 17.6; Includes: RecName: Full=Protease; Includes: RecName: Full=Reverse transcriptase; Includes: RecN	_	_	PF00078.24|RVT_1|Reverse transcriptase (RNA-dependent DNA polymerase)|m.1233:69-228
c106680_g1	23858.00	1104.00	247.357	11.275	-4.44	6.01e-04	5.20e-02	no	down	reverse transcriptase [Limulus polyphemus]	RecName: Full=Retrovirus-related Pol polyprotein from type-1 retrotransposable element R2; AltName: Full=Retrovirus-related Pol polyprotein from type I retrotransposa	_	_	PF00078.24|RVT_1|Reverse transcriptase (RNA-dependent DNA polymerase)|m.5251:669-926
c130032_g1	5.00	148.00	0.073	3.431	4.35	6.04e-04	5.20e-02	no	up	_	_	_	_	_
c102905_g1	237.00	9.00	15.090	0.558	-4.53	6.08e-04	5.20e-02	no	down	_	_	_	_	_
c123294_g4	12.00	293.00	0.782	18.585	4.40	6.08e-04	5.20e-02	no	up	_	_	_	_	_
c101472_g1	42.00	0.00	2.651	0.000	-4.78	6.15e-04	5.20e-02	no	down	_	_	_	_	_
c109635_g5	42.00	0.00	3.091	0.000	-5.00	6.15e-04	5.20e-02	no	down	PREDICTED: protocadherin-16 [Sorex araneus]	RecName: Full=Protocadherin-16; AltName: Full=Protein dachsous homolog 1; Flags: Precursor [Rattus norvegicus]	_	DCHS1_2, PCDH16_23	PF00028.14|Cadherin|Cadherin domain|m.30679:121-208
c125097_g2	42.00	0.00	3.042	0.000	-4.97	6.15e-04	5.20e-02	no	down	_	_	_	_	_
c28997_g1	42.00	0.00	2.077	0.000	-4.44	6.15e-04	5.20e-02	no	down	hypothetical protein [Paramecium tetraurelia strain d4-2]	RecName: Full=Heat shock protein 81-2; Short=HSP81-2; AltName: Full=Heat shock protein 90 [Oryza sativa Japonica Group]	annotation not avaliable	htpG, HSP90A	_
c40096_g1	0.00	40.00	0.000	3.188	5.04	6.15e-04	5.20e-02	no	up	_	_	_	_	_
c105710_g4	0.00	40.00	0.000	5.140	5.71	6.15e-04	5.20e-02	no	up	_	_	_	_	_
c125469_g6	0.00	40.00	0.000	5.419	5.79	6.15e-04	5.20e-02	no	up	_	_	_	_	_
c111074_g1	0.00	40.00	0.000	2.158	4.50	6.15e-04	5.20e-02	no	up	_	_	_	_	_
c101361_g3	72.00	1496.00	9.384	188.746	4.32	6.30e-04	5.32e-02	no	up	_	_	_	_	_
c113612_g1	41.00	0.00	10.203	0.000	-6.69	6.65e-04	5.43e-02	no	down	hypothetical protein LOTGIDRAFT_232244 [Lottia gigantea]	_	_	_	_
c92828_g1	41.00	0.00	4.179	0.000	-5.42	6.65e-04	5.43e-02	no	down	_	_	_	_	_
c115725_g1	41.00	0.00	3.287	0.000	-5.08	6.65e-04	5.43e-02	no	down	_	_	_	_	_
c93139_g2	41.00	0.00	0.880	0.000	-3.29	6.65e-04	5.43e-02	no	down	hypothetical protein CGI_10027189 [Crassostrea gigas]	_	_	_	_
c109124_g1	41.00	0.00	1.943	0.000	-4.35	6.65e-04	5.43e-02	no	down	_	_	_	_	_
c189198_g1	41.00	0.00	2.615	0.000	-4.76	6.65e-04	5.43e-02	no	down	hypothetical protein HMPREF1120_11008 (mitochondrion) [Exophiala dermatitidis NIH/UT8656]	_	_	_	_
c116629_g3	41.00	0.00	3.556	0.000	-5.19	6.65e-04	5.43e-02	no	down	_	_	_	_	PF09848.6|DUF2075|Uncharacterized conserved protein (DUF2075)|m.34564:129-224
c88838_g2	0.00	39.00	0.000	2.800	4.86	6.65e-04	5.43e-02	no	up	_	_	_	_	_
c106211_g1	0.00	39.00	0.000	3.443	5.15	6.65e-04	5.43e-02	no	up	_	_	_	_	_
c122492_g2	0.00	39.00	0.000	4.510	5.53	6.65e-04	5.43e-02	no	up	_	_	_	_	_
c94188_g1	0.00	39.00	0.000	2.194	4.52	6.65e-04	5.43e-02	no	up	_	_	_	_	_
c72740_g1	0.00	39.00	0.000	4.716	5.59	6.65e-04	5.43e-02	no	up	_	_	_	_	_
c117955_g2	0.00	39.00	0.000	4.595	5.55	6.65e-04	5.43e-02	no	up	_	_	_	_	_
c108223_g1	83.00	2.00	3.580	0.085	-4.31	7.03e-04	5.74e-02	no	down	_	_	_	_	_
c116144_g2	633.00	29.00	54.557	4.922	-3.44	7.07e-04	5.75e-02	no	down	PREDICTED: uncharacterized protein LOC103311248 [Acyrthosiphon pisum]	_	_	_	_
c100113_g1	40.00	0.00	3.336	0.000	-5.10	7.21e-04	5.85e-02	no	down	PREDICTED: protein AIG1-like [Citrus sinensis]	_	_	_	PF04548.13|AIG1|AIG1 family|m.38860:1-195
c129315_g3	81.00	2.00	7.172	0.170	-4.75	7.62e-04	6.14e-02	no	down	_	_	_	_	_
c111450_g1	0.00	38.00	0.000	3.467	5.16	7.82e-04	6.14e-02	no	up	C-type lectin 2 [Anguilla japonica]	RecName: Full=C-type lectin domain family 10 member A; AltName: Full=MMGL; AltName: Full=Macrophage asialoglycoprotein-binding protein 1; Short=M-ASGP-BP-1; AltName:	_	CLEC10A, CLECSF13, CLECSF14	PF00059.18|Lectin_C|Lectin C-type domain|m.9342:43-150
c185980_g1	0.00	38.00	0.000	2.000	4.39	7.82e-04	6.14e-02	no	up	_	_	_	_	_
c128630_g1	39.00	0.00	8.749	0.000	-6.47	7.82e-04	6.14e-02	no	down	_	_	_	_	_
c108485_g6	39.00	0.00	3.763	0.000	-5.27	7.82e-04	6.14e-02	no	down	_	_	_	_	_
c110916_g1	39.00	0.00	4.387	0.000	-5.49	7.82e-04	6.14e-02	no	down	_	_	_	_	PF00791.17|ZU5|ZU5 domain|m.19279:2-93
c71138_g1	39.00	0.00	4.069	0.000	-5.38	7.82e-04	6.14e-02	no	down	_	_	_	_	_
c32150_g1	38.00	0.00	3.311	0.000	-5.09	7.82e-04	6.14e-02	no	down	hypothetical protein LOTGIDRAFT_238744 [Lottia gigantea]	_	_	_	_
c101626_g1	38.00	0.00	2.138	0.000	-4.48	7.82e-04	6.14e-02	no	down	PREDICTED: E-selectin [Sarcophilus harrisii]	RecName: Full=P-selectin; AltName: Full=CD62 antigen-like family member P; AltName: Full=Granule membrane protein 140; Short=GMP-140; AltName: Full=Leukocyte-endo	_	SELE	_
c56077_g1	38.00	0.00	3.934	0.000	-5.33	7.82e-04	6.14e-02	no	down	_	_	_	_	_
c165067_g1	38.00	0.00	1.564	0.000	-4.06	7.82e-04	6.14e-02	no	down	_	_	_	_	_
c98961_g1	38.00	0.00	3.372	0.000	-5.12	7.82e-04	6.14e-02	no	down	_	_	_	_	_
c118182_g1	38.00	0.00	4.289	0.000	-5.46	7.82e-04	6.14e-02	no	down	_	_	_	_	_
c90177_g1	38.00	0.00	1.283	0.000	-3.79	7.82e-04	6.14e-02	no	down	_	_	_	_	_
c128344_g3	1.00	58.00	0.098	3.188	4.05	7.88e-04	6.16e-02	no	up	_	_	_	_	_
c127070_g2	60.00	1.00	3.079	0.048	-4.42	7.88e-04	6.16e-02	no	down	_	_	_	_	_
c125997_g1	55.00	1072.00	1.698	32.417	4.18	7.90e-04	6.16e-02	no	up	_	_	_	_	_
c112530_g2	4.00	114.00	0.721	19.846	4.60	8.49e-04	6.46e-02	no	up	_	_	_	_	_
c63065_g1	0.00	37.00	0.000	3.213	5.05	8.51e-04	6.46e-02	no	up	PREDICTED: calpain-B-like [Aplysia californica]	RecName: Full=Calpain small subunit 1; Short=CSS1; AltName: Full=Calcium-activated neutral proteinase small subunit; Short=CANP small subunit; AltName: Full=Calcium-	_	CAPNS1, CAPN4	PF13833.3|EF-hand_8|EF-hand domain pair|m.78062:8-33
c119925_g1	0.00	37.00	0.000	2.776	4.85	8.51e-04	6.46e-02	no	up	PREDICTED: complement C1q-like protein 2 [Poecilia formosa]	RecName: Full=Complement C1q-like protein 4; AltName: Full=C1q and tumor necrosis factor-related protein 11; Short=C1q/TNF-related protein 11; Flags: Precursor [Ho	_	_	PF00386.18|C1q|C1q domain|m.74174:124-235
c123035_g2	0.00	37.00	0.000	9.105	6.52	8.51e-04	6.46e-02	no	up	_	_	_	_	_
c157992_g1	0.00	37.00	0.000	1.964	4.37	8.51e-04	6.46e-02	no	up	_	_	_	_	_
c90557_g1	0.00	37.00	0.000	4.316	5.46	8.51e-04	6.46e-02	no	up	PREDICTED: latent-transforming growth factor beta-binding protein 2 [Anas platyrhynchos]	RecName: Full=Epidermal growth factor-like protein 7; Short=EGF-like protein 7; AltName: Full=Multiple epidermal growth factor-like domains protein 7; Short=Multip	_	LTBP2_3_4	_
c103987_g2	37.00	0.00	4.167	0.000	-5.42	8.51e-04	6.46e-02	no	down	_	_	_	_	_
c78834_g1	37.00	0.00	5.682	0.000	-5.85	8.51e-04	6.46e-02	no	down	_	_	_	_	_
c83779_g1	37.00	0.00	8.431	0.000	-6.41	8.51e-04	6.46e-02	no	down	_	_	_	_	_
c100303_g1	37.00	0.00	1.833	0.000	-4.27	8.51e-04	6.46e-02	no	down	_	_	_	_	_
c84158_g4	37.00	0.00	1.869	0.000	-4.30	8.51e-04	6.46e-02	no	down	_	_	_	_	_
c114574_g1	37.00	0.00	1.772	0.000	-4.23	8.51e-04	6.46e-02	no	down	_	_	_	_	PF00041.18|fn3|Fibronectin type III domain|m.34233:67-133;PF00041.18|fn3|Fibronectin type III domain|m.34233:246-371
c108469_g1	0.00	36.00	0.000	4.340	5.47	9.28e-04	6.99e-02	no	up	_	_	_	_	_
c124679_g1	36.00	0.00	8.834	0.000	-6.48	9.28e-04	6.99e-02	no	down	_	_	_	_	_
c100820_g2	36.00	0.00	5.450	0.000	-5.79	9.28e-04	6.99e-02	no	down	_	_	_	_	_
c97757_g1	1.00	55.00	0.037	2.146	4.04	9.32e-04	6.99e-02	no	up	_	_	_	_	_
c117726_g1	57.00	1.00	1.466	0.024	-3.66	9.32e-04	6.99e-02	no	down	_	_	_	_	_
c121480_g1	95.00	3.00	1.307	0.036	-3.37	9.33e-04	6.99e-02	no	down	PREDICTED: deleted in malignant brain tumors 1 protein-like [Strongylocentrotus purpuratus]	RecName: Full=Antigen WC1.1; Flags: Precursor	_	_	PF00530.15|SRCR|Scavenger receptor cysteine-rich domain|m.15123:219-313;PF00530.15|SRCR|Scavenger receptor cysteine-rich domain|m.15123:323-417;PF00530.15|SRCR|Scavenger receptor cysteine-rich domain|m.15123:428-525;PF00530.15|SRCR|Scavenger receptor cysteine-rich domain|m.15123:537-634;PF00530.15|SRCR|Scavenger receptor cysteine-rich domain|m.15123:646-741;PF00530.15|SRCR|Scavenger receptor cyst…
c113707_g2	994.00	51.00	39.748	2.000	-4.25	9.82e-04	7.34e-02	no	down	von Willebrand factor D and EGF domain-containing protein [Crassostrea gigas]	RecName: Full=Pancreatic secretory granule membrane major glycoprotein GP2; AltName: Full=Pancreatic zymogen granule membrane protein GP-2; Flags: Precursor	_	_	_
c112474_g1	93.00	3.00	3.177	0.097	-4.06	1.00e-03	7.38e-02	no	down	_	_	_	_	_
c107887_g1	0.00	35.00	0.000	6.680	6.08	1.01e-03	7.38e-02	no	up	_	_	_	_	_
c89826_g1	0.00	35.00	0.000	5.722	5.86	1.01e-03	7.38e-02	no	up	G-type lysozyme [Physella acuta]	RecName: Full=Glycine, glutamate and proline-rich protein; Flags: Precursor	_	_	_
c132856_g1	0.00	35.00	0.000	1.382	3.89	1.01e-03	7.38e-02	no	up	Receptor-type tyrosine-protein phosphatase T [Crassostrea gigas]	_	_	PTPRU	PF00102.24|Y_phosphatase|Protein-tyrosine phosphatase|m.52096:344-520
c106442_g1	0.00	35.00	0.000	2.073	4.44	1.01e-03	7.38e-02	no	up	_	_	_	_	_
c119166_g2	0.00	35.00	0.000	2.170	4.50	1.01e-03	7.38e-02	no	up	hypothetical protein LOTGIDRAFT_229551 [Lottia gigantea]	_	_	_	PF04749.14|PLAC8|PLAC8 family|m.42178:19-103
c112238_g1	0.00	35.00	0.000	26.453	8.05	1.01e-03	7.38e-02	no	up	_	_	_	_	_
c95977_g1	0.00	35.00	0.000	2.316	4.59	1.01e-03	7.38e-02	no	up	_	_	_	_	_
c65755_g1	35.00	0.00	3.152	0.000	-5.02	1.01e-03	7.38e-02	no	down	_	_	_	_	_
c51477_g1	35.00	0.00	3.910	0.000	-5.33	1.01e-03	7.38e-02	no	down	_	_	_	_	_
c109054_g1	35.00	0.00	0.953	0.000	-3.40	1.01e-03	7.38e-02	no	down	_	_	_	_	_
c92055_g1	35.00	0.00	2.151	0.000	-4.49	1.01e-03	7.38e-02	no	down	_	_	_	_	PF07686.14|V-set|Immunoglobulin V-set domain|m.17816:60-141
c117038_g1	8.00	180.00	0.513	8.535	3.82	1.02e-03	7.38e-02	no	up	_	_	_	_	_
c131784_g1	0.00	34.00	0.000	3.879	5.31	1.11e-03	7.91e-02	no	up	_	_	_	_	_
c1860_g1	0.00	34.00	0.000	8.026	6.34	1.11e-03	7.91e-02	no	up	_	_	_	_	_
c23924_g1	0.00	34.00	0.000	3.261	5.07	1.11e-03	7.91e-02	no	up	_	_	_	_	_
c142128_g1	0.00	34.00	0.000	1.903	4.32	1.11e-03	7.91e-02	no	up	_	_	_	_	_
c99312_g1	0.00	34.00	0.000	1.503	4.00	1.11e-03	7.91e-02	no	up	_	_	_	_	_
c123637_g2	0.00	34.00	0.000	220.970	11.11	1.11e-03	7.91e-02	no	up	PREDICTED: cytochrome P450 3A8-like isoform X1 [Aplysia californica]	_	_	_	_
c106435_g3	34.00	0.00	2.187	0.000	-4.52	1.11e-03	7.91e-02	no	down	_	_	_	_	_
c106435_g2	34.00	0.00	1.821	0.000	-4.26	1.11e-03	7.91e-02	no	down	_	_	_	_	_
c71843_g2	34.00	0.00	3.238	0.000	-5.06	1.11e-03	7.91e-02	no	down	_	_	_	_	_
c126158_g4	54.00	1.00	50.830	0.849	-5.75	1.11e-03	7.91e-02	no	down	_	_	_	_	_
c124922_g2	1553.00	26251.00	64.711	1072.457	4.05	1.13e-03	8.00e-02	no	up	hypothetical protein LOTGIDRAFT_207716 [Lottia gigantea]	RecName: Full=11-beta-hydroxysteroid dehydrogenase-like 2; AltName: Full=17-beta-hydroxysteroid dehydrogenase-like 2; AltName: Full=Hydroxysteroid dehydrogenase 2;	_	_	PF13561.3|adh_short_C2|Enoyl-(Acyl carrier protein) reductase|m.4160:40-275;PF00106.22|adh_short|short chain dehydrogenase|m.4160:34-222;PF08659.7|KR|KR domain|m.4160:36-196
c105498_g2	53.00	1.00	3.360	0.061	-4.43	1.18e-03	8.37e-02	no	down	_	_	_	_	_
c108833_g2	331.00	17.00	13.856	0.703	-4.12	1.19e-03	8.45e-02	no	down	PREDICTED: uncharacterized protein LOC101853419 [Aplysia californica]	_	_	_	PF07801.8|DUF1647|Protein of unknown function (DUF1647)|m.20686:133-237
c125835_g2	23.00	421.00	1.454	18.403	3.57	1.22e-03	8.48e-02	no	up	_	_	_	_	PF12478.5|DUF3697|Ubiquitin-associated protein 2|m.56479:325-348
c91585_g1	0.00	33.00	0.000	1.321	3.83	1.22e-03	8.48e-02	no	up	PREDICTED: uncharacterized protein LOC101862849 isoform X1 [Aplysia californica]	_	_	_	_
c108318_g1	0.00	33.00	0.000	2.813	4.86	1.22e-03	8.48e-02	no	up	_	_	_	_	_
c128203_g2	0.00	33.00	0.000	2.994	4.95	1.22e-03	8.48e-02	no	up	_	_	_	_	_
c66564_g2	0.00	33.00	0.000	3.128	5.01	1.22e-03	8.48e-02	no	up	_	_	_	_	_
c130082_g1	33.00	0.00	1.931	0.000	-4.34	1.22e-03	8.48e-02	no	down	_	_	_	_	_
c75864_g1	33.00	0.00	1.417	0.000	-3.92	1.22e-03	8.48e-02	no	down	_	_	_	_	_
c120213_g1	33.00	0.00	0.513	0.000	-2.62	1.22e-03	8.48e-02	no	down	Hemicentin-1 [Crassostrea gigas]	RecName: Full=Semaphorin-5B [Homo sapiens]	_	HMCN	PF00090.16|TSP_1|Thrombospondin type 1 domain|m.13876:500-550;PF00090.16|TSP_1|Thrombospondin type 1 domain|m.13876:559-602;PF00090.16|TSP_1|Thrombospondin type 1 domain|m.13876:609-659;PF02494.13|HYR|HYR domain|m.13876:112-193;PF07699.10|Ephrin_rec_like|Putative ephrin-receptor like|m.13876:200-247;PF07699.10|Ephrin_rec_like|Putative ephrin-receptor like|m.13876:893-932;PF00008.24|EGF|EGF-like d…
c105737_g1	87.00	3.00	2.725	0.097	-3.84	1.24e-03	8.62e-02	no	down	_	_	_	_	_
c91262_g2	52.00	1.00	8.675	0.158	-5.09	1.26e-03	8.70e-02	no	down	_	_	_	_	_
c65145_g1	2.00	67.00	0.354	11.311	4.65	1.28e-03	8.89e-02	no	up	_	_	_	_	_
c188375_g1	0.00	32.00	0.000	3.128	5.01	1.34e-03	9.12e-02	no	up	_	_	_	_	_
c164937_g1	0.00	32.00	0.000	0.849	3.25	1.34e-03	9.12e-02	no	up	PREDICTED: uncharacterized protein LOC101862849 isoform X1 [Aplysia californica]	_	_	_	_
c124781_g3	0.00	32.00	0.000	4.340	5.47	1.34e-03	9.12e-02	no	up	_	_	_	_	_
c112056_g2	32.00	0.00	0.978	0.000	-3.43	1.34e-03	9.12e-02	no	down	_	_	_	_	_
c78527_g1	32.00	0.00	1.564	0.000	-4.06	1.34e-03	9.12e-02	no	down	_	_	_	_	_
c111203_g3	32.00	0.00	3.324	0.000	-5.10	1.34e-03	9.12e-02	no	down	_	_	_	_	_
c128242_g2	32.00	0.00	2.468	0.000	-4.68	1.34e-03	9.12e-02	no	down	_	_	_	_	_
c85656_g1	32.00	0.00	2.187	0.000	-4.52	1.34e-03	9.12e-02	no	down	_	_	_	_	_
c130784_g1	1271.00	74.00	11.913	0.679	-3.95	1.40e-03	9.49e-02	no	down	PREDICTED: sushi, von Willebrand factor type A, EGF and pentraxin domain-containing protein 1-like [Aplysia californica]	RecName: Full=Coadhesin, partial [Acropora millepora]	_	HMCN	PF02494.13|HYR|HYR domain|m.6622:118-198;PF02494.13|HYR|HYR domain|m.6622:317-398;PF02494.13|HYR|HYR domain|m.6622:517-598;PF00090.16|TSP_1|Thrombospondin type 1 domain|m.6622:1280-1330;PF00090.16|TSP_1|Thrombospondin type 1 domain|m.6622:1337-1387;PF00090.16|TSP_1|Thrombospondin type 1 domain|m.6622:1395-1444;PF07699.10|Ephrin_rec_like|Putative ephrin-receptor like|m.6622:912-959;PF07699.10|Ephr…
c109107_g1	6.00	130.00	0.782	16.439	4.23	1.41e-03	9.52e-02	no	up	_	_	_	_	_
c113414_g1	181.00	9.00	8.443	0.412	-4.06	1.45e-03	9.81e-02	no	down	Fibrillin-1 [Crassostrea gigas]	RecName: Full=Multiple epidermal growth factor-like domains protein 6; Short=Multiple EGF-like domains protein 6; AltName: Full=Epidermal growth factor-like protein	_	FBLN1_2	PF07645.12|EGF_CA|Calcium-binding EGF domain|m.17942:55-96;PF07645.12|EGF_CA|Calcium-binding EGF domain|m.17942:142-183;PF07645.12|EGF_CA|Calcium-binding EGF domain|m.17942:185-217
c106326_g1	0.00	31.00	0.000	1.528	4.03	1.48e-03	9.81e-02	no	up	_	_	_	_	PF00041.18|fn3|Fibronectin type III domain|m.6574:119-178;PF00041.18|fn3|Fibronectin type III domain|m.6574:290-403
c110141_g1	0.00	31.00	0.000	2.510	4.71	1.48e-03	9.81e-02	no	up	_	_	_	_	_
c112056_g3	0.00	31.00	0.000	1.612	4.10	1.48e-03	9.81e-02	no	up	_	_	_	_	_
c93217_g1	0.00	31.00	0.000	2.206	4.53	1.48e-03	9.81e-02	no	up	_	_	_	_	_
c107622_g1	31.00	0.00	0.819	0.000	-3.20	1.48e-03	9.81e-02	no	down	_	_	_	_	PF13927.3|Ig_3|Immunoglobulin domain|m.68663:351-412;PF07679.13|I-set|Immunoglobulin I-set domain|m.68663:346-421;PF13895.3|Ig_2|Immunoglobulin domain|m.68663:353-414;PF00047.22|ig|Immunoglobulin domain|m.68663:350-422
c118975_g1	31.00	0.00	5.425	0.000	-5.79	1.48e-03	9.81e-02	no	down	_	_	_	_	_
c105051_g1	31.00	0.00	3.348	0.000	-5.11	1.48e-03	9.81e-02	no	down	_	_	_	_	_
c111203_g1	31.00	0.00	3.800	0.000	-5.29	1.48e-03	9.81e-02	no	down	_	_	_	_	_
c122953_g3	31.00	0.00	1.552	0.000	-4.05	1.48e-03	9.81e-02	no	down	_	_	_	_	_
c76454_g1	31.00	0.00	4.778	0.000	-5.61	1.48e-03	9.81e-02	no	down	_	_	_	_	_
c101586_g2	130.00	6.00	5.523	0.255	-3.99	1.55e-03	1.03e-01	no	down	serine protease inhibitor protein [Haliotis discus discus]	_	_	SERPINB	PF00079.17|Serpin|Serpin (serine protease inhibitor)|m.55903:1-336
c112543_g2	303.00	17.00	7.783	0.424	-3.91	1.59e-03	1.05e-01	no	down	hypothetical protein LOTGIDRAFT_231475 [Lottia gigantea]	RecName: Full=Stromelysin-3; Short=SL-3; Short=ST3; AltName: Full=Matrix metalloproteinase-11; Short=MMP-11; Flags: Precursor [Mus musculus]	_	MMP14	PF00413.21|Peptidase_M10|Matrixin|m.21770:164-317;PF00045.16|Hemopexin|Hemopexin|m.21770:411-443;PF00045.16|Hemopexin|Hemopexin|m.21770:508-546;PF01471.15|PG_binding_1|Putative peptidoglycan binding domain|m.21770:83-134
c115061_g1	0.00	30.00	0.000	3.904	5.32	1.64e-03	1.06e-01	no	up	_	_	_	_	_
c120444_g1	0.00	30.00	0.000	0.703	3.01	1.64e-03	1.06e-01	no	up	PREDICTED: uncharacterized protein LOC101862849 isoform X1 [Aplysia californica]	_	_	_	_
c111578_g2	0.00	30.00	0.000	1.479	3.98	1.64e-03	1.06e-01	no	up	_	_	_	_	_
c130336_g2	0.00	30.00	0.000	3.952	5.34	1.64e-03	1.06e-01	no	up	_	_	_	_	_
c53604_g1	30.00	0.00	3.556	0.000	-5.19	1.64e-03	1.06e-01	no	down	_	_	_	_	_
c116629_g4	30.00	0.00	2.835	0.000	-4.88	1.64e-03	1.06e-01	no	down	_	_	_	_	_
c152871_g1	30.00	0.00	2.517	0.000	-4.71	1.64e-03	1.06e-01	no	down	_	_	_	_	_
c66914_g1	30.00	0.00	2.358	0.000	-4.62	1.64e-03	1.06e-01	no	down	_	_	_	_	_
c124922_g3	23.00	380.00	1.344	21.713	3.92	1.70e-03	1.10e-01	no	up	_	_	_	_	_
c119097_g1	343.00	20.00	9.934	0.715	-3.62	1.72e-03	1.11e-01	no	down	_	_	_	_	_
c95555_g1	94.00	4.00	4.582	0.194	-3.99	1.73e-03	1.12e-01	no	down	Alpha tubulin,putative [Oxytricha trifallax]	RecName: Full=Tubulin alpha chain	Tubulin alpha chain; Tubulin is the major constituent of microtubules. It binds two moles of [...]	TUBA	_
c106149_g1	13.00	227.00	0.990	16.766	3.95	1.74e-03	1.13e-01	no	up	hypothetical protein TRIADDRAFT_7511 [Trichoplax adhaerens]	_	_	BAX	PF00452.16|Bcl-2|Apoptosis regulator proteins, Bcl-2 family|m.3966:81-173
c118655_g3	0.00	29.00	0.000	3.964	5.34	1.81e-03	1.15e-01	no	up	_	_	_	_	_
c166453_g1	0.00	29.00	0.000	2.534	4.72	1.81e-03	1.15e-01	no	up	_	_	_	_	_
c105362_g1	0.00	29.00	0.000	0.776	3.13	1.81e-03	1.15e-01	no	up	hypothetical protein LOTGIDRAFT_154208 [Lottia gigantea]	RecName: Full=Cadherin-23; AltName: Full=Otocadherin; Flags: Precursor [Homo sapiens]	_	DCHS1_2, PCDH16_23	PF00028.14|Cadherin|Cadherin domain|m.9139:43-126;PF00028.14|Cadherin|Cadherin domain|m.9139:142-231;PF00028.14|Cadherin|Cadherin domain|m.9139:246-351;PF00028.14|Cadherin|Cadherin domain|m.9139:479-564;PF00028.14|Cadherin|Cadherin domain|m.9139:594-677
c84194_g1	0.00	29.00	0.000	3.855	5.31	1.81e-03	1.15e-01	no	up	_	_	_	_	_
c108343_g2	0.00	29.00	0.000	2.752	4.83	1.81e-03	1.15e-01	no	up	_	_	_	_	_
c192262_g1	29.00	0.00	3.605	0.000	-5.21	1.81e-03	1.15e-01	no	down	_	_	_	_	_
c94681_g1	29.00	0.00	2.590	0.000	-4.75	1.81e-03	1.15e-01	no	down	_	_	_	_	_
c60615_g3	29.00	0.00	1.283	0.000	-3.79	1.81e-03	1.15e-01	no	down	_	_	_	_	_
c106389_g4	29.00	0.00	1.234	0.000	-3.74	1.81e-03	1.15e-01	no	down	hypothetical protein, conserved [Eimeria brunetti]	RecName: Full=Keratin-associated protein 5-8; AltName: Full=Keratin, ultra high-sulfur matrix protein B; AltName: Full=Keratin-associated protein 5.8; AltName: Ful	_	_	PF00041.18|fn3|Fibronectin type III domain|m.72335:290-361
c123899_g4	29.00	0.00	3.177	0.000	-5.03	1.81e-03	1.15e-01	no	down	_	_	_	_	_
c84646_g1	29.00	0.00	7.734	0.000	-6.29	1.81e-03	1.15e-01	no	down	hypothetical protein SORBIDRAFT_03g034710 [Sorghum bicolor]	_	_	_	_
c97979_g3	29.00	0.00	3.800	0.000	-5.29	1.81e-03	1.15e-01	no	down	_	_	_	_	_
c92216_g1	2.00	59.00	0.086	2.328	3.71	1.91e-03	1.20e-01	no	up	transposase [planctomycete transposase [planctomycete KSU-1]	_	_	_	PF01609.18|DDE_Tnp_1|Transposase DDE domain|m.72734:160-333
c114478_g2	29.00	449.00	6.366	37.364	2.53	1.97e-03	1.24e-01	no	up	_	_	_	_	_
c107098_g1	8.00	145.00	1.417	24.768	4.03	2.02e-03	1.25e-01	no	up	_	_	_	_	_
c54450_g2	0.00	28.00	0.000	9.990	6.66	2.02e-03	1.25e-01	no	up	_	_	_	_	_
c176310_g1	0.00	28.00	0.000	2.255	4.56	2.02e-03	1.25e-01	no	up	_	_	_	_	_
c92321_g1	0.00	28.00	0.000	1.249	3.75	2.02e-03	1.25e-01	no	up	_	_	_	_	_
c154707_g1	0.00	28.00	0.000	1.855	4.29	2.02e-03	1.25e-01	no	up	_	_	_	_	_
c96290_g1	0.00	28.00	0.000	0.691	2.98	2.02e-03	1.25e-01	no	up	Tyrosine-protein phosphatase 10D [Crassostrea gigas]	_	_	PTPRB, PTPB	PF00102.24|Y_phosphatase|Protein-tyrosine phosphatase|m.39741:552-782
c146247_g1	28.00	0.00	1.821	0.000	-4.26	2.02e-03	1.25e-01	no	down	_	_	_	_	_
c74058_g1	28.00	0.00	2.651	0.000	-4.78	2.02e-03	1.25e-01	no	down	_	_	_	_	_
c116403_g1	28.00	0.00	1.173	0.000	-3.67	2.02e-03	1.25e-01	no	down	_	_	_	_	_
c110834_g1	28.00	0.00	2.884	0.000	-4.90	2.02e-03	1.25e-01	no	down	_	_	_	_	_
c123740_g3	368.00	23.00	36.522	2.219	-3.98	2.05e-03	1.27e-01	no	down	_	_	_	_	_
c114918_g2	7.00	128.00	0.171	3.310	3.65	2.14e-03	1.32e-01	no	up	hypothetical protein LOTGIDRAFT_236770 [Lottia gigantea]	RecName: Full=ADAM family mig-17; AltName: Full=A disintegrin and metalloproteinase mig-17; AltName: Full=Abnormal cell migration protein 17; Flags: Precursor [Cae	_	_	PF01421.16|Reprolysin|Reprolysin (M12B) family zinc metalloprotease|m.35430:232-365;PF13688.3|Reprolysin_5|Metallo-peptidase family M12|m.35430:130-328;PF13582.3|Reprolysin_3|Metallo-peptidase family M12B Reprolysin-like|m.35430:161-314;PF13574.3|Reprolysin_2|Metallo-peptidase family M12B Reprolysin-like|m.35430:162-361
c71069_g1	44.00	1.00	4.973	0.109	-4.60	2.14e-03	1.32e-01	no	down	_	_	_	_	_
c111662_g2	279.00	3878.00	5.132	70.836	3.76	2.16e-03	1.33e-01	no	up	PREDICTED: uncharacterized protein LOC101857434 [Aplysia californica]	_	_	_	PF00903.22|Glyoxalase|Glyoxalase/Bleomycin resistance protein/Dioxygenase superfamily|m.58599:33-209
c130478_g1	10.00	170.00	0.110	1.903	3.25	2.18e-03	1.33e-01	no	up	_	_	_	_	PF00580.18|UvrD-helicase|UvrD/REP helicase N-terminal domain|m.62428:10-79;PF00580.18|UvrD-helicase|UvrD/REP helicase N-terminal domain|m.62428:135-179;PF13604.3|AAA_30|AAA domain|m.62428:5-205;PF13245.3|AAA_19|Part of AAA domain|m.62428:18-76;PF09848.6|DUF2075|Uncharacterized conserved protein (DUF2075)|m.62428:23-190;PF05127.11|Helicase_RecD|Helicase|m.62428:23-150;PF02562.13|PhoH|PhoH-like pro…
c118360_g1	39.00	559.00	4.606	60.677	3.69	2.20e-03	1.34e-01	no	up	PREDICTED: lactose-binding lectin l-2-like [Xiphophorus maculatus]	RecName: Full=Collectin-10; AltName: Full=Collectin-1; Short=CL-1; Short=cCL-1; Flags: Precursor [Gallus gallus]	_	MRC	PF00059.18|Lectin_C|Lectin C-type domain|m.2849:46-154
c124240_g2	18.00	279.00	1.173	17.845	3.82	2.24e-03	1.35e-01	no	up	_	_	_	_	_
c123798_g1	21.00	321.00	1.051	23.495	4.36	2.24e-03	1.35e-01	no	up	_	_	_	_	_
c109431_g1	116.00	6.00	3.690	0.182	-3.75	2.24e-03	1.35e-01	no	down	endo-1,3(4)-beta-glucanase, putative [Cordyceps militaris CM01]	RecName: Full=Uncharacterized protein YMR317W [Saccharomyces cerevisiae S288c]	_	_	_
c187250_g1	27.00	0.00	3.727	0.000	-5.26	2.26e-03	1.35e-01	no	down	_	_	_	_	_
c154404_g1	27.00	0.00	1.918	0.000	-4.33	2.26e-03	1.35e-01	no	down	_	_	_	_	_
c111671_g1	27.00	0.00	1.454	0.000	-3.96	2.26e-03	1.35e-01	no	down	_	_	_	_	_
c108753_g2	27.00	0.00	3.275	0.000	-5.08	2.26e-03	1.35e-01	no	down	_	_	_	_	_
c127788_g5	27.00	0.00	1.760	0.000	-4.22	2.26e-03	1.35e-01	no	down	_	_	_	_	_
c135542_g1	27.00	0.00	4.228	0.000	-5.44	2.26e-03	1.35e-01	no	down	_	_	_	_	_
c128000_g3	27.00	0.00	2.456	0.000	-4.68	2.26e-03	1.35e-01	no	down	GTPase IMAP family member 7 [Salmo salar]	_	_	_	PF04548.13|AIG1|AIG1 family|m.67825:90-281;PF01926.20|MMR_HSR1|50S ribosome-binding GTPase|m.67825:90-212
c181281_g1	27.00	0.00	2.566	0.000	-4.74	2.26e-03	1.35e-01	no	down	hypothetical protein LOTGIDRAFT_71188, partial [Lottia gigantea]	RecName: Full=Dorsal-ventral patterning tolloid-like protein 1; AltName: Full=Mini fin protein; Flags: Precursor [Danio rerio]	_	CUBN	PF00431.17|CUB|CUB domain|m.11917:152-262;PF14670.3|FXa_inhibition|Coagulation Factor Xa inhibitory site|m.11917:113-148
c108432_g1	6033.00	417.00	230.019	15.590	-3.87	2.26e-03	1.35e-01	no	down	_	_	_	_	_
c103792_g1	3.00	70.00	3.446	7.165	1.03	2.28e-03	1.36e-01	no	up	_	_	_	_	_
c47701_g1	3.00	70.00	0.134	2.982	3.72	2.28e-03	1.36e-01	no	up	transposase [planctomycete transposase [planctomycete KSU-1]	RecName: Full=Probable transposase for transposon Tn903	_	_	PF13737.3|DDE_Tnp_1_5|Transposase DDE domain|m.46728:45-153;PF01609.18|DDE_Tnp_1|Transposase DDE domain|m.46728:138-320
c63089_g1	23.00	339.00	1.760	25.313	3.77	2.44e-03	1.45e-01	no	up	PREDICTED: fibrillin-3-like [Latimeria chalumnae]	RecName: Full=Fibrillin-2; Flags: Precursor [Mus musculus]	_	_	PF07645.12|EGF_CA|Calcium-binding EGF domain|m.59843:62-100;PF07645.12|EGF_CA|Calcium-binding EGF domain|m.59843:103-136
c163984_g1	0.00	26.00	0.000	39.570	8.63	2.53e-03	1.48e-01	no	up	actin3 [Procambarus clarkii]	_	_	ACTB_G1	_
c101366_g1	0.00	26.00	0.000	2.170	4.50	2.53e-03	1.48e-01	no	up	_	_	_	_	_
c6538_g1	0.00	26.00	0.000	3.588	5.20	2.53e-03	1.48e-01	no	up	_	_	_	_	_
c111530_g1	0.00	26.00	0.000	2.352	4.62	2.53e-03	1.48e-01	no	up	_	_	_	_	_
c79132_g1	0.00	26.00	0.000	1.952	4.36	2.53e-03	1.48e-01	no	up	_	_	_	_	_
c41116_g1	0.00	26.00	0.000	1.515	4.01	2.53e-03	1.48e-01	no	up	_	_	_	_	_
c126770_g6	26.00	0.00	9.384	0.000	-6.57	2.53e-03	1.48e-01	no	down	_	_	_	_	_
c26492_g2	26.00	0.00	2.334	0.000	-4.61	2.53e-03	1.48e-01	no	down	_	_	_	_	_
c131198_g1	26.00	0.00	5.059	0.000	-5.69	2.53e-03	1.48e-01	no	down	_	_	_	_	_
c21840_g1	26.00	0.00	1.747	0.000	-4.21	2.53e-03	1.48e-01	no	down	_	_	_	_	_
c102973_g2	26.00	0.00	2.859	0.000	-4.89	2.53e-03	1.48e-01	no	down	_	_	_	_	PF00041.18|fn3|Fibronectin type III domain|m.51148:99-210
c128313_g1	877.00	11546.00	14.223	205.610	3.84	2.54e-03	1.48e-01	no	up	_	_	_	_	PF00680.17|RdRP_1|RNA dependent RNA polymerase|m.64460:3-213
c89738_g1	437.00	30.00	141.762	39.704	-1.83	2.60e-03	1.51e-01	no	down	_	_	_	_	_
c128494_g1	41.00	1.00	4.545	0.109	-4.47	2.68e-03	1.55e-01	no	down	_	_	_	_	_
c94919_g1	1.00	39.00	0.061	2.231	3.86	2.68e-03	1.55e-01	no	up	_	_	_	_	_
c103530_g2	1.00	39.00	0.110	4.316	4.39	2.68e-03	1.55e-01	no	up	_	_	_	_	_
c107776_g2	2.00	52.00	0.147	3.601	3.91	2.81e-03	1.62e-01	no	up	reverse transcriptase, putative [Pediculus humanus corporis]	_	_	_	_
c112301_g1	2.00	52.00	0.220	5.504	4.13	2.81e-03	1.62e-01	no	up	_	_	_	_	_
c110615_g3	0.00	25.00	0.000	3.334	5.10	2.84e-03	1.62e-01	no	up	_	_	_	_	_
c127164_g3	0.00	25.00	0.000	2.485	4.69	2.84e-03	1.62e-01	no	up	_	_	_	_	_
c159397_g1	25.00	0.00	2.089	0.000	-4.45	2.84e-03	1.62e-01	no	down	_	_	_	_	_
c108485_g5	25.00	0.00	2.187	0.000	-4.52	2.84e-03	1.62e-01	no	down	_	_	_	_	_
c174672_g1	25.00	0.00	1.845	0.000	-4.28	2.84e-03	1.62e-01	no	down	_	_	_	_	_
c101959_g2	25.00	0.00	1.002	0.000	-3.46	2.84e-03	1.62e-01	no	down	PREDICTED: SCAN domain-containing protein 3 [Otolemur garnettii]	RecName: Full=SCAN domain-containing protein 3; AltName: Full=Transposon-derived Buster4 transposase-like protein; AltName: Full=Zinc finger BED domain-containing	_	_	_
c120627_g4	25.00	0.00	3.409	0.000	-5.13	2.84e-03	1.62e-01	no	down	_	_	_	_	_
c40817_g1	25.00	0.00	1.100	0.000	-3.58	2.84e-03	1.62e-01	no	down	_	_	_	_	_
c98906_g1	25.00	0.00	3.702	0.000	-5.25	2.84e-03	1.62e-01	no	down	_	_	_	_	_
c124485_g1	3.00	65.00	0.244	5.649	4.06	2.86e-03	1.63e-01	no	up	_	_	_	_	_
c105620_g1	40.00	1.00	2.920	0.073	-4.13	2.89e-03	1.63e-01	no	down	_	_	_	_	_
c44210_g1	40.00	1.00	11.547	0.279	-4.94	2.89e-03	1.63e-01	no	down	_	_	_	_	_
c69809_g1	40.00	1.00	2.639	0.061	-4.09	2.89e-03	1.63e-01	no	down	_	_	_	_	_
c101521_g1	40.00	1.00	5.926	0.145	-4.62	2.89e-03	1.63e-01	no	down	_	_	_	_	_
c89892_g1	40.00	1.00	5.804	0.145	-4.59	2.89e-03	1.63e-01	no	down	_	_	_	_	_
c122021_g2	93.00	5.00	9.641	0.509	-4.00	2.90e-03	1.63e-01	no	down	_	_	_	_	_
c116514_g1	2294.00	28789.00	253.124	3162.525	3.64	2.94e-03	1.65e-01	no	up	C-type lectin A [Azumapecten farreri]	_	_	MRC	PF00059.18|Lectin_C|Lectin C-type domain|m.71984:43-150;PF05473.9|UL45|UL45 protein, carbohydrate-binding C-type lectin-like|m.71984:6-62
c124919_g3	2.00	51.00	0.073	3.989	4.56	2.98e-03	1.67e-01	no	up	_	_	_	_	_
c97437_g1	2.00	51.00	0.293	7.128	4.20	2.98e-03	1.67e-01	no	up	_	_	_	_	_
c110475_g3	1.00	38.00	0.024	1.030	3.19	3.13e-03	1.73e-01	no	up	_	_	_	_	PF12773.4|DZR|Double zinc ribbon|m.70883:3-46
c122263_g1	1.00	38.00	0.037	2.982	4.49	3.13e-03	1.73e-01	no	up	_	_	_	_	_
c115360_g1	1.00	38.00	0.049	2.012	3.83	3.13e-03	1.73e-01	no	up	_	_	_	_	_
c180843_g1	0.00	24.00	0.000	108.951	10.09	3.21e-03	1.73e-01	no	up	EF hand repeat-containing protein [Pseudanabaena biceps]	_	_	_	_
c47057_g1	0.00	24.00	0.000	1.612	4.10	3.21e-03	1.73e-01	no	up	_	_	_	_	_
c104424_g3	0.00	24.00	0.000	1.952	4.36	3.21e-03	1.73e-01	no	up	_	_	_	_	_
c104426_g1	0.00	24.00	0.000	3.358	5.11	3.21e-03	1.73e-01	no	up	_	_	_	_	_
c102490_g2	0.00	24.00	0.000	0.752	3.09	3.21e-03	1.73e-01	no	up	hypothetical protein [Gemmata obscuriglobus]	_	_	_	_
c125694_g2	0.00	24.00	0.000	1.164	3.66	3.21e-03	1.73e-01	no	up	_	_	_	_	_
c54785_g1	0.00	24.00	0.000	1.152	3.65	3.21e-03	1.73e-01	no	up	_	_	_	_	_
c98187_g1	0.00	24.00	0.000	1.709	4.18	3.21e-03	1.73e-01	no	up	_	_	_	_	_
c122673_g3	0.00	24.00	0.000	35.279	8.47	3.21e-03	1.73e-01	no	up	_	_	_	_	_
c40927_g1	0.00	24.00	0.000	2.025	4.41	3.21e-03	1.73e-01	no	up	_	_	_	_	_
c164834_g1	0.00	24.00	0.000	2.061	4.43	3.21e-03	1.73e-01	no	up	_	_	_	_	_
c107698_g4	24.00	0.00	10.129	0.000	-6.68	3.21e-03	1.73e-01	no	down	_	_	_	_	_
c91559_g1	24.00	0.00	0.819	0.000	-3.20	3.21e-03	1.73e-01	no	down	_	_	_	_	_
c122737_g2	24.00	0.00	1.466	0.000	-3.97	3.21e-03	1.73e-01	no	down	_	_	_	_	_
c110567_g2	24.00	0.00	2.175	0.000	-4.51	3.21e-03	1.73e-01	no	down	_	_	_	_	_
c96195_g2	24.00	0.00	1.686	0.000	-4.16	3.21e-03	1.73e-01	no	down	_	_	_	_	_
c118182_g2	24.00	0.00	1.417	0.000	-3.92	3.21e-03	1.73e-01	no	down	_	_	_	_	_
c121591_g5	24.00	0.00	7.820	0.000	-6.31	3.21e-03	1.73e-01	no	down	_	_	_	_	_
c109400_g1	24.00	0.00	1.503	0.000	-4.00	3.21e-03	1.73e-01	no	down	PREDICTED: fibrinogen C domain-containing protein 1-like [Amphimedon queenslandica]	_	_	_	PF00147.15|Fibrinogen_C|Fibrinogen beta and gamma chains, C-terminal globular domain|m.50913:132-335
c29465_g1	24.00	0.00	3.116	0.000	-5.01	3.21e-03	1.73e-01	no	down	PREDICTED: low-density lipoprotein receptor-related protein 4-like [Aplysia californica]	RecName: Full=Low-density lipoprotein receptor-related protein 5; Short=LRP-5; AltName: Full=Low-density lipoprotein receptor-related protein 7; Short=LRP-7; AltNa	_	_	PF00058.14|Ldl_recept_b|Low-density lipoprotein receptor repeat class B|m.13279:73-113
c125489_g1	116.00	7.00	1.405	0.085	-3.02	3.24e-03	1.74e-01	no	down	_	_	_	_	_
c121006_g2	128.00	8.00	2.908	0.182	-3.42	3.28e-03	1.76e-01	no	down	hypothetical protein DICPUDRAFT_15402 [Dictyostelium purpureum]	RecName: Full=Multiple epidermal growth factor-like domains protein 6; Short=Multiple EGF-like domains protein 6; AltName: Full=Epidermal growth factor-like protein	_	FBLN1_2	PF07645.12|EGF_CA|Calcium-binding EGF domain|m.10135:166-206;PF07645.12|EGF_CA|Calcium-binding EGF domain|m.10135:208-247;PF07645.12|EGF_CA|Calcium-binding EGF domain|m.10135:249-288;PF07645.12|EGF_CA|Calcium-binding EGF domain|m.10135:290-329;PF07645.12|EGF_CA|Calcium-binding EGF domain|m.10135:331-370;PF07645.12|EGF_CA|Calcium-binding EGF domain|m.10135:372-411;PF07645.12|EGF_CA|Calcium-binding…
c112851_g2	64.00	3.00	1.992	0.097	-3.41	3.31e-03	1.77e-01	no	down	_	_	_	_	_
c113854_g1	64.00	3.00	3.788	0.170	-3.85	3.31e-03	1.77e-01	no	down	_	_	_	_	_
c117647_g2	1.00	37.00	13.881	4.473	-1.61	3.40e-03	1.81e-01	no	down	_	_	_	_	_
c112512_g1	37.00	1.00	1.637	0.048	-3.55	3.40e-03	1.81e-01	no	down	_	_	_	_	_
c108456_g1	80.00	986.00	4.423	52.324	3.53	3.40e-03	1.81e-01	no	up	_	_	_	_	_
c122688_g3	3.00	61.00	0.281	5.625	3.91	3.48e-03	1.85e-01	no	up	Pyroglutamylated RFamide peptide receptor [Crassostrea gigas]	_	_	NPFFR2	PF00001.18|7tm_1|7 transmembrane receptor (rhodopsin family)|m.40665:1-59
c98272_g1	2109.00	24896.00	188.267	2164.202	3.52	3.56e-03	1.89e-01	no	up	_	_	_	_	_
c94138_g1	0.00	23.00	0.000	2.655	4.78	3.64e-03	1.89e-01	no	up	_	_	_	_	_
c115653_g4	0.00	23.00	0.000	17.809	7.48	3.64e-03	1.89e-01	no	up	_	_	_	_	_
c186699_g1	0.00	23.00	0.000	1.612	4.10	3.64e-03	1.89e-01	no	up	_	_	_	_	_
c131315_g1	0.00	23.00	0.000	2.619	4.77	3.64e-03	1.89e-01	no	up	_	_	_	_	_
c111823_g1	23.00	0.00	0.782	0.000	-3.14	3.64e-03	1.89e-01	no	down	_	_	_	_	_
c75843_g1	23.00	0.00	6.195	0.000	-5.98	3.64e-03	1.89e-01	no	down	_	_	_	_	_
c69048_g2	23.00	0.00	3.250	0.000	-5.07	3.64e-03	1.89e-01	no	down	_	_	_	_	_
c85969_g1	23.00	0.00	1.576	0.000	-4.07	3.64e-03	1.89e-01	no	down	_	_	_	_	_
c89845_g1	23.00	0.00	29.789	0.000	-8.22	3.64e-03	1.89e-01	no	down	hypothetical protein, partial [Rhodospirillum photometricum]	_	_	_	_
c97820_g1	23.00	0.00	0.660	0.000	-2.93	3.64e-03	1.89e-01	no	down	hypothetical protein CGI_10017873 [Crassostrea gigas]	_	_	_	_
c87042_g1	23.00	0.00	2.334	0.000	-4.61	3.64e-03	1.89e-01	no	down	_	_	_	_	_
c85660_g1	23.00	0.00	11.119	0.000	-6.81	3.64e-03	1.89e-01	no	down	_	_	_	_	_
c122801_g1	23.00	0.00	7.820	0.000	-6.31	3.64e-03	1.89e-01	no	down	_	_	_	_	_
c123057_g2	23.00	0.00	2.358	0.000	-4.62	3.64e-03	1.89e-01	no	down	_	_	_	_	_
c190887_g1	23.00	0.00	3.727	0.000	-5.26	3.64e-03	1.89e-01	no	down	_	_	_	_	_
c130125_g1	1.00	36.00	0.061	2.134	3.79	3.69e-03	1.91e-01	no	up	_	_	_	_	_
c111024_g2	110.00	7.00	2.102	0.133	-3.24	3.72e-03	1.93e-01	no	down	_	_	_	_	PF07707.12|BACK|BTB And C-terminal Kelch|m.36307:139-236;PF00651.28|BTB|BTB/POZ domain|m.36307:29-131;PF01344.22|Kelch_1|Kelch motif|m.36307:378-417;PF01344.22|Kelch_1|Kelch motif|m.36307:429-461;PF13854.3|Kelch_5|Kelch motif|m.36307:370-412
c111626_g4	6.00	95.00	0.293	4.510	3.55	3.84e-03	1.98e-01	no	up	_	_	_	_	_
c118108_g1	6.00	95.00	0.244	5.031	3.90	3.84e-03	1.98e-01	no	up	_	_	_	_	_
c117143_g2	3.00	59.00	0.257	3.455	3.32	3.84e-03	1.98e-01	no	up	_	_	_	_	_
c104296_g1	3.00	59.00	0.354	5.031	3.50	3.84e-03	1.98e-01	no	up	PREDICTED: cubilin-like [Lepisosteus oculatus]	RecName: Full=CUB domain-containing protein 2; Flags: Precursor [Mus musculus]	_	CUBN	PF00431.17|CUB|CUB domain|m.75364:34-144;PF00431.17|CUB|CUB domain|m.75364:148-258
c121166_g1	96.00	6.00	3.886	0.242	-3.54	3.96e-03	2.03e-01	no	down	_	_	_	_	_
c111662_g1	945.00	10790.00	7.563	85.129	3.48	3.97e-03	2.03e-01	no	up	PREDICTED: uncharacterized protein LOC101857434 [Aplysia californica]	_	_	_	PF00903.22|Glyoxalase|Glyoxalase/Bleomycin resistance protein/Dioxygenase superfamily|m.34630:35-233
c107247_g1	1.00	35.00	0.086	12.729	6.11	4.02e-03	2.05e-01	no	up	_	_	_	_	_
c109775_g5	35.00	1.00	14.895	0.400	-4.91	4.02e-03	2.05e-01	no	down	_	_	_	_	_
c128310_g3	7.00	105.00	0.868	12.657	3.72	4.06e-03	2.06e-01	no	up	_	_	_	_	_
c114589_g1	2.00	46.00	0.134	3.091	3.77	4.06e-03	2.06e-01	no	up	_	_	_	_	_
c103871_g1	0.00	22.00	0.000	1.273	3.78	4.15e-03	2.06e-01	no	up	hypothetical protein LOTGIDRAFT_154208 [Lottia gigantea]	RecName: Full=Neural-cadherin; AltName: Full=Cadherin-N; Short=dN-cadherin; Flags: Precursor [Drosophila melanogaster]	_	CELSR2	PF00028.14|Cadherin|Cadherin domain|m.61288:38-134;PF00028.14|Cadherin|Cadherin domain|m.61288:149-239;PF00028.14|Cadherin|Cadherin domain|m.61288:255-358
c78630_g1	0.00	22.00	0.000	1.418	3.92	4.15e-03	2.06e-01	no	up	_	_	_	_	_
c130756_g3	0.00	22.00	0.000	2.461	4.68	4.15e-03	2.06e-01	no	up	_	_	_	_	_
c101269_g1	0.00	22.00	0.000	0.339	2.13	4.15e-03	2.06e-01	no	up	PREDICTED: uncharacterized protein LOC101862849 isoform X1 [Aplysia californica]	_	_	_	_
c23891_g1	0.00	22.00	0.000	1.127	3.62	4.15e-03	2.06e-01	no	up	_	_	_	_	_
c93409_g1	0.00	22.00	0.000	2.316	4.59	4.15e-03	2.06e-01	no	up	_	_	_	_	_
c108475_g3	0.00	22.00	0.000	9.868	6.64	4.15e-03	2.06e-01	no	up	_	_	_	_	_
c123818_g1	0.00	22.00	0.000	1.588	4.08	4.15e-03	2.06e-01	no	up	_	_	_	_	_
c56691_g1	0.00	22.00	0.000	2.703	4.81	4.15e-03	2.06e-01	no	up	_	_	_	_	_
c128213_g2	0.00	22.00	0.000	4.716	5.59	4.15e-03	2.06e-01	no	up	_	_	_	_	_
c109386_g1	0.00	22.00	0.000	2.109	4.47	4.15e-03	2.06e-01	no	up	_	_	_	_	_
c112323_g4	22.00	0.00	2.212	0.000	-4.53	4.15e-03	2.06e-01	no	down	_	_	_	_	_
c86352_g1	22.00	0.00	1.625	0.000	-4.11	4.15e-03	2.06e-01	no	down	_	_	_	_	_
c97820_g2	22.00	0.00	1.344	0.000	-3.85	4.15e-03	2.06e-01	no	down	_	_	_	_	_
c92932_g1	22.00	0.00	2.871	0.000	-4.89	4.15e-03	2.06e-01	no	down	_	_	_	_	_
c110007_g1	22.00	0.00	0.550	0.000	-2.70	4.15e-03	2.06e-01	no	down	_	_	_	_	_
c108979_g2	22.00	0.00	3.042	0.000	-4.97	4.15e-03	2.06e-01	no	down	_	_	_	_	_
c86851_g1	22.00	0.00	1.882	0.000	-4.31	4.15e-03	2.06e-01	no	down	_	_	_	_	_
c167022_g1	22.00	0.00	2.590	0.000	-4.75	4.15e-03	2.06e-01	no	down	PREDICTED: tolloid-like protein 1-like [Echinops telfairi]	RecName: Full=Tolloid-like protein 2; AltName: Full=Metalloprotease xolloid; AltName: Full=Xenopus tolloid; Flags: Precursor [Xenopus laevis]	_	BMP1, TLD	PF00431.17|CUB|CUB domain|m.9509:1-86
c27104_g1	22.00	0.00	2.566	0.000	-4.74	4.15e-03	2.06e-01	no	down	hypothetical protein [Magnetospirillum gryphiswaldense]	_	_	_	_
c118790_g1	52.00	603.00	1.405	16.075	3.43	4.21e-03	2.08e-01	no	up	hypothetical protein BRAFLDRAFT_86061 [Branchiostoma floridae]	RecName: Full=Ficolin-2; AltName: Full=37 kDa elastin-binding protein; AltName: Full=Collagen/fibrinogen domain-containing protein 2; AltName: Full=EBP-37; AltName	_	FCN	PF00147.15|Fibrinogen_C|Fibrinogen beta and gamma chains, C-terminal globular domain|m.29843:334-541
c113311_g1	1033.00	86.00	29.863	2.449	-3.56	4.29e-03	2.12e-01	no	down	_	_	_	_	_
c128551_g2	7.00	103.00	0.196	2.861	3.32	4.30e-03	2.12e-01	no	up	_	_	_	_	PF04548.13|AIG1|AIG1 family|m.18335:1-94
c105559_g1	69.00	4.00	4.020	0.242	-3.59	4.59e-03	2.26e-01	no	down	toll-like receptor W precursor [Mytilus galloprovincialis]	_	_	TLR2	PF01582.17|TIR|TIR domain|m.20369:94-196;PF13676.3|TIR_2|TIR domain|m.20369:97-196
c119831_g1	220.00	2415.00	1.210	13.081	3.33	4.60e-03	2.26e-01	no	up	PREDICTED: TBC1 domain family member 4 isoform X3 [Callorhinchus milii]	RecName: Full=TBC1 domain family member 4; AltName: Full=Akt substrate of 160 kDa; Short=AS160 [Homo sapiens]	TBC1 domain family, member 4	TBC1D1	PF00566.15|RabGAP-TBC|Rab-GTPase-TBC domain|m.44362:862-1073;PF11830.5|DUF3350|Domain of unknown function (DUF3350)|m.44362:763-800
c108700_g1	57.00	3.00	6.329	0.279	-4.08	4.74e-03	2.28e-01	no	down	_	_	_	_	_
c87658_g1	0.00	21.00	0.000	1.600	4.09	4.75e-03	2.28e-01	no	up	_	_	_	_	_
c90627_g1	0.00	21.00	0.000	1.067	3.54	4.75e-03	2.28e-01	no	up	_	_	_	_	_
c165016_g1	0.00	21.00	0.000	2.837	4.88	4.75e-03	2.28e-01	no	up	hypothetical protein TcasGA2_TC006929 [Tribolium castaneum]	_	_	_	_
c11341_g1	0.00	21.00	0.000	1.491	3.99	4.75e-03	2.28e-01	no	up	_	_	_	_	_
c116299_g3	0.00	21.00	0.000	1.709	4.18	4.75e-03	2.28e-01	no	up	_	_	_	_	_
c107890_g4	0.00	21.00	0.000	1.964	4.37	4.75e-03	2.28e-01	no	up	_	_	_	_	_
c100809_g1	21.00	0.00	2.248	0.000	-4.55	4.75e-03	2.28e-01	no	down	_	_	_	_	_
c74315_g1	21.00	0.00	19.257	0.000	-7.60	4.75e-03	2.28e-01	no	down	_	_	_	_	_
c95253_g1	21.00	0.00	2.700	0.000	-4.81	4.75e-03	2.28e-01	no	down	_	_	_	_	_
c96600_g1	21.00	0.00	5.303	0.000	-5.76	4.75e-03	2.28e-01	no	down	hypothetical protein SELMODRAFT_171512 [Selaginella moellendorffii]	RecName: Full=Elongation factor 1-alpha; Short=EF-1-alpha; AltName: Full=14 nm filament-associated protein	_	EEF1A	_
c91489_g1	21.00	0.00	1.833	0.000	-4.27	4.75e-03	2.28e-01	no	down	PREDICTED: LOW QUALITY PROTEIN: general transcription factor II-I repeat domain-containing protein 2B-like [Chrysemys picta bellii]	_	_	_	_
c127788_g1	21.00	0.00	2.688	0.000	-4.80	4.75e-03	2.28e-01	no	down	PREDICTED: LOW QUALITY PROTEIN: collagen alpha-1(XII) chain-like [Lepisosteus oculatus]	_	_	_	PF00092.25|VWA|von Willebrand factor type A domain|m.45034:84-192;PF13519.3|VWA_2|von Willebrand factor type A domain|m.45034:87-192
c108203_g1	21.00	0.00	3.165	0.000	-5.03	4.75e-03	2.28e-01	no	down	_	_	_	_	_
c124733_g2	21.00	0.00	1.124	0.000	-3.61	4.75e-03	2.28e-01	no	down	_	_	_	_	_
c152234_g1	21.00	0.00	2.725	0.000	-4.82	4.75e-03	2.28e-01	no	down	_	_	_	_	_
c86156_g1	562.00	6063.00	79.251	826.428	3.38	4.76e-03	2.28e-01	no	up	_	_	_	_	PF13202.3|EF-hand_5|EF hand|m.62233:128-146
c94692_g1	1.00	33.00	0.049	1.903	3.75	4.79e-03	2.29e-01	no	up	_	_	_	_	_
c106356_g3	33.00	1.00	3.067	0.085	-4.10	4.79e-03	2.29e-01	no	down	_	_	_	_	_
c117955_g1	4.00	66.00	0.232	3.698	3.52	4.80e-03	2.29e-01	no	up	_	_	_	_	_
c107229_g2	5.00	77.00	0.855	12.754	3.75	4.83e-03	2.30e-01	no	up	Cadherin-87A [Camponotus floridanus]	_	_	FAT4	PF00028.14|Cadherin|Cadherin domain|m.69812:5-85
c124480_g2	6.00	88.00	0.562	8.001	3.61	4.84e-03	2.31e-01	no	up	_	_	_	_	_
c127045_g2	15.00	185.00	1.259	15.251	3.50	4.87e-03	2.32e-01	no	up	hypothetical protein CAPTEDRAFT_192565 [Capitella teleta]	_	_	_	PF00651.28|BTB|BTB/POZ domain|m.37029:39-143
c113332_g1	40.00	445.00	2.688	29.520	3.41	4.88e-03	2.32e-01	no	up	_	_	_	_	PF06462.9|Hyd_WA|Propeller|m.33441:25-96
c80823_g2	2.00	43.00	0.061	1.237	3.05	4.96e-03	2.35e-01	no	up	transposase [planctomycete transposase [planctomycete KSU-1]	_	_	_	PF05598.8|DUF772|Transposase domain (DUF772)|m.71479:53-121;PF13751.3|DDE_Tnp_1_6|Transposase DDE domain|m.71479:348-467;PF01609.18|DDE_Tnp_1|Transposase DDE domain|m.71479:243-463
c121084_g4	100.00	7.00	14.174	0.958	-3.75	5.01e-03	2.37e-01	no	down	_	_	_	_	_
c101764_g1	56.00	3.00	4.472	0.230	-3.79	5.01e-03	2.37e-01	no	down	_	_	_	_	_
c88644_g1	89.00	6.00	9.005	0.594	-3.71	5.01e-03	2.37e-01	no	down	_	_	_	_	_
c118147_g2	11.00	140.00	4.643	16.815	1.83	5.08e-03	2.40e-01	no	up	_	_	_	_	_
c119622_g1	483.00	41.00	17.827	2.619	-2.72	5.10e-03	2.41e-01	no	down	PREDICTED: uncharacterized protein LOC101846908 isoform X1 [Aplysia californica]	_	_	_	PF03318.10|ETX_MTX2|Clostridium epsilon toxin ETX/Bacillus mosquitocidal toxin MTX2|m.38370:88-220
c109991_g2	1.00	32.00	0.318	9.505	4.52	5.25e-03	2.47e-01	no	up	_	_	_	_	_
c131411_g1	32.00	1.00	1.955	0.061	-3.67	5.25e-03	2.47e-01	no	down	_	_	_	_	PF00431.17|CUB|CUB domain|m.74191:48-139;PF00431.17|CUB|CUB domain|m.74191:169-259
c122203_g2	66.00	4.00	3.067	0.182	-3.49	5.26e-03	2.47e-01	no	down	hypothetical protein HELRODRAFT_167028 [Helobdella robusta]	_	_	_	PF14529.3|Exo_endo_phos_2|Endonuclease-reverse transcriptase|m.48873:116-221;PF03372.20|Exo_endo_phos|Endonuclease/Exonuclease/phosphatase family|m.48873:22-255
c127426_g1	11731.00	1066.00	461.589	42.819	-3.43	5.27e-03	2.47e-01	no	down	_	_	_	_	_
c104821_g2	8.00	107.00	0.513	6.777	3.49	5.29e-03	2.47e-01	no	up	_	_	_	_	_
c118917_g1	2.00	42.00	0.208	2.073	2.82	5.31e-03	2.48e-01	no	up	hypothetical protein M513_08573 [Trichuris suis]	_	_	_	PF14291.3|DUF4371|Domain of unknown function (DUF4371)|m.38035:33-102
c123221_g2	11.00	137.00	0.415	5.080	3.33	5.42e-03	2.48e-01	no	up	_	_	_	_	_
c123497_g1	0.00	20.00	0.000	1.649	4.13	5.47e-03	2.48e-01	no	up	_	_	_	_	_
c103914_g1	0.00	20.00	0.000	1.285	3.79	5.47e-03	2.48e-01	no	up	_	_	_	_	_
c94733_g1	0.00	20.00	0.000	1.237	3.74	5.47e-03	2.48e-01	no	up	_	_	_	_	_
c3073_g1	0.00	20.00	0.000	1.418	3.92	5.47e-03	2.48e-01	no	up	_	_	_	_	_
c94896_g1	0.00	20.00	0.000	5.565	5.82	5.47e-03	2.48e-01	no	up	Hoglet [Monosiga ovata]	_	_	_	_
c118714_g1	0.00	20.00	0.000	3.164	5.03	5.47e-03	2.48e-01	no	up	_	_	_	_	_
c78408_g1	0.00	20.00	0.000	1.491	3.99	5.47e-03	2.48e-01	no	up	_	_	_	_	_
c104170_g1	0.00	20.00	0.000	12.426	6.97	5.47e-03	2.48e-01	no	up	_	_	_	_	_
c186086_g1	20.00	0.00	2.774	0.000	-4.84	5.47e-03	2.48e-01	no	down	_	_	_	_	_
c117488_g1	20.00	0.00	0.782	0.000	-3.14	5.47e-03	2.48e-01	no	down	_	_	_	_	_
c68606_g1	20.00	0.00	4.448	0.000	-5.51	5.47e-03	2.48e-01	no	down	_	_	_	_	_
c63366_g1	20.00	0.00	3.042	0.000	-4.97	5.47e-03	2.48e-01	no	down	_	_	_	_	_
c71109_g1	20.00	0.00	1.857	0.000	-4.29	5.47e-03	2.48e-01	no	down	_	_	_	_	_
c123650_g3	20.00	0.00	8.981	0.000	-6.50	5.47e-03	2.48e-01	no	down	_	_	_	_	_
c90977_g1	20.00	0.00	1.869	0.000	-4.30	5.47e-03	2.48e-01	no	down	_	_	_	_	_
c110331_g2	20.00	0.00	2.664	0.000	-4.79	5.47e-03	2.48e-01	no	down	_	_	_	_	_
c100000_g1	20.00	0.00	1.393	0.000	-3.90	5.47e-03	2.48e-01	no	down	_	_	_	_	_
c52610_g1	20.00	0.00	1.100	0.000	-3.58	5.47e-03	2.48e-01	no	down	PREDICTED: uncharacterized protein LOC101154770 [Oryzias latipes]	_	_	SELE	PF00084.17|Sushi|Sushi repeat (SCR repeat)|m.35720:154-214;PF00084.17|Sushi|Sushi repeat (SCR repeat)|m.35720:219-279
c92346_g2	20.00	0.00	1.918	0.000	-4.33	5.47e-03	2.48e-01	no	down	_	_	_	_	_
c131136_g1	20.00	0.00	1.601	0.000	-4.09	5.47e-03	2.48e-01	no	down	_	_	_	_	_
c88581_g1	20.00	0.00	1.760	0.000	-4.22	5.47e-03	2.48e-01	no	down	_	_	_	_	_
c116149_g2	54.00	3.00	7.026	0.315	-4.10	5.60e-03	2.54e-01	no	down	_	_	_	_	_
c89871_g1	235.00	20.00	21.163	1.758	-3.52	5.61e-03	2.54e-01	no	down	_	_	_	_	_
c102012_g1	31.00	1.00	4.826	0.158	-4.25	5.77e-03	2.61e-01	no	down	_	_	_	_	_
c100132_g1	3.00	51.00	0.367	5.965	3.70	5.93e-03	2.68e-01	no	up	_	_	_	_	_
c116416_g1	74.00	761.00	8.211	81.989	3.30	5.99e-03	2.70e-01	no	up	hypothetical protein BRAFLDRAFT_72548 [Branchiostoma floridae]	_	_	_	_
c103443_g1	2.00	40.00	0.159	3.116	3.63	6.13e-03	2.76e-01	no	up	_	_	_	_	_
c121886_g1	121.00	1212.00	1.393	13.772	3.22	6.20e-03	2.79e-01	no	up	PREDICTED: uncharacterized protein LOC102387224 [Alligator sinensis]	RecName: Full=Retrovirus-related Pol polyprotein from transposon 297; Includes: RecName: Full=Protease; Includes: RecName: Full=Reverse transcriptase; Includes: RecNa	_	_	PF00078.24|RVT_1|Reverse transcriptase (RNA-dependent DNA polymerase)|m.28484:1061-1217;PF00665.23|rve|Integrase core domain|m.28484:648-762;PF02023.14|SCAN|SCAN domain|m.28484:210-296
c103688_g1	31.00	331.00	3.507	36.358	3.34	6.27e-03	2.81e-01	no	up	_	_	_	_	PF13202.3|EF-hand_5|EF hand|m.64372:108-125
c93139_g1	103.00	8.00	1.833	0.279	-2.35	6.29e-03	2.82e-01	no	down	hypothetical protein CGI_10027189 [Crassostrea gigas]	_	_	_	_
c106550_g1	124.00	10.00	6.610	0.521	-3.43	6.33e-03	2.83e-01	no	down	PREDICTED: transmembrane protease serine 9-like [Aplysia californica]	_	_	PRSS7	PF00089.23|Trypsin|Trypsin|m.51756:158-382;PF13365.3|Trypsin_2|Trypsin-like peptidase domain|m.51756:181-315
c110465_g1	124.00	10.00	8.932	0.703	-3.49	6.33e-03	2.83e-01	no	down	_	_	_	_	_
c84377_g1	385.00	3741.00	38.355	362.351	3.24	6.63e-03	2.96e-01	no	up	PREDICTED: low affinity immunoglobulin epsilon Fc receptor [Sarcophilus harrisii]	RecName: Full=Conglutinin; Flags: Precursor [Bos taurus]	_	FCER2, CD23	PF00059.18|Lectin_C|Lectin C-type domain|m.7075:47-155
c104749_g1	111.00	9.00	12.866	0.970	-3.60	6.67e-03	2.97e-01	no	down	protein lethal, putative [Pediculus humanus corporis]	_	_	CRYAB	PF00011.18|HSP20|Hsp20/alpha crystallin family|m.55315:47-138
c117005_g1	1.00	29.00	0.049	1.370	3.30	7.01e-03	3.12e-01	no	up	_	_	_	_	_
c129254_g2	44.00	432.00	0.696	1.431	0.94	7.10e-03	3.16e-01	no	up	PREDICTED: E3 ubiquitin-protein ligase RNF213-like, partial [Maylandia zebra]	RecName: Full=E3 ubiquitin-protein ligase RNF213; AltName: Full=ALK lymphoma oligomerization partner on chromosome 17; AltName: Full=Mysterin; AltName: Full=RING	_	_	PF12773.4|DZR|Double zinc ribbon|m.73923:3-51
c96749_g1	40.00	2.00	4.533	0.218	-3.86	7.10e-03	3.16e-01	no	down	_	_	_	_	_
c107878_g3	282.00	27.00	15.933	1.491	-3.33	7.47e-03	3.31e-01	no	down	Exonuclease 3'-5' domain-containing protein 1 [Crassostrea gigas]	_	_	_	_
c94275_g1	619.00	61.00	194.377	31.823	-2.61	7.51e-03	3.33e-01	no	down	_	_	_	_	_
c101113_g1	3.00	47.00	0.477	10.717	4.23	7.53e-03	3.33e-01	no	up	_	_	_	_	_
c109380_g1	40.00	386.00	2.517	23.907	3.20	7.56e-03	3.34e-01	no	up	_	_	_	_	_
c123769_g1	87.00	7.00	1.491	0.121	-2.85	7.67e-03	3.38e-01	no	down	PREDICTED: myosin-9-like [Xiphophorus maculatus]	_	_	_	PF00386.18|C1q|C1q domain|m.12345:486-609;PF13445.3|zf-RING_UBOX|RING-type zinc-finger|m.12345:16-52;PF00097.22|zf-C3HC4|Zinc finger, C3HC4 type (RING finger)|m.12345:16-49
c99162_g1	38.00	2.00	0.990	0.048	-2.88	7.67e-03	3.38e-01	no	down	_	_	_	_	_
c110562_g1	28.00	1.00	10.178	0.339	-4.55	7.76e-03	3.41e-01	no	down	_	_	_	_	PF03128.11|CXCXC|CXCXC repeat|m.32197:37-49
c129263_g2	28.00	1.00	1.906	0.061	-3.64	7.76e-03	3.41e-01	no	down	_	_	_	_	_
c48593_g2	28.00	1.00	2.419	0.085	-3.77	7.76e-03	3.41e-01	no	down	_	_	_	_	_
c101476_g1	755.00	76.00	96.687	9.420	-3.35	7.79e-03	3.42e-01	no	down	_	_	_	_	_
c111295_g1	399.00	39.00	44.574	4.231	-3.37	7.95e-03	3.48e-01	no	down	_	_	_	_	_
c160226_g1	171.00	16.00	23.411	2.122	-3.40	8.01e-03	3.50e-01	no	down	_	_	_	_	_
c114029_g1	48.00	3.00	28.067	1.612	-4.04	8.01e-03	3.50e-01	no	down	_	_	_	_	_
c119692_g1	161.00	15.00	6.109	0.558	-3.24	8.10e-03	3.54e-01	no	down	Putative cytochrome P450 CYP13A5, partial [Crassostrea gigas]	RecName: Full=Cytochrome P450 3A40 [Oryzias latipes]	_	CYP3A	PF00067.19|p450|Cytochrome P450|m.23734:34-477
c63899_g1	2.00	37.00	0.134	2.328	3.38	8.29e-03	3.61e-01	no	up	_	_	_	_	_
c113567_g1	2.00	37.00	0.257	4.667	3.74	8.29e-03	3.61e-01	no	up	_	_	_	_	_
c104861_g1	1.00	27.00	0.134	3.661	4.01	8.62e-03	3.73e-01	no	up	_	_	_	_	_
c103655_g5	1.00	27.00	0.232	6.062	4.21	8.62e-03	3.73e-01	no	up	hypothetical protein HHA_202110 [Hammondia hammondi]	_	_	_	_
c46956_g1	1.00	27.00	0.073	2.594	3.96	8.62e-03	3.73e-01	no	up	_	_	_	_	_
c110691_g1	27.00	1.00	2.346	0.085	-3.72	8.62e-03	3.73e-01	no	down	_	_	_	_	_
c109331_g2	27.00	1.00	4.264	0.158	-4.08	8.62e-03	3.73e-01	no	down	_	_	_	_	_
c113023_g1	162.00	1451.00	9.335	81.820	3.12	8.71e-03	3.76e-01	no	up	_	_	_	_	_
c187640_g1	330.00	34.00	27.688	2.776	-3.27	8.85e-03	3.82e-01	no	down	_	_	_	_	_
c126239_g1	154.00	15.00	5.388	0.485	-3.23	9.27e-03	4.00e-01	no	down	_	_	_	_	_
c109270_g1	466.00	49.00	30.437	3.128	-3.24	9.47e-03	4.07e-01	no	down	_	_	_	_	_
c120817_g1	27.00	253.00	0.904	8.026	3.02	9.57e-03	4.10e-01	no	up	PREDICTED: ficolin-1 isoform X1 [Mustela putorius furo]	_	_	FCN	PF00147.15|Fibrinogen_C|Fibrinogen beta and gamma chains, C-terminal globular domain|m.53713:310-481
c112292_g1	1.00	26.00	0.073	1.746	3.42	9.60e-03	4.10e-01	no	up	_	_	_	_	_
c131405_g1	1.00	26.00	0.049	1.212	3.14	9.60e-03	4.10e-01	no	up	_	_	_	_	_
c82931_g2	26.00	1.00	2.151	0.085	-3.60	9.60e-03	4.10e-01	no	down	TNF receptor-associated factor 6 [Haliotis diversicolor]	_	_	_	_
c121227_g2	26.00	1.00	0.415	0.012	-2.20	9.60e-03	4.10e-01	no	down	_	_	_	_	_
c112389_g2	26.00	1.00	2.920	0.109	-3.85	9.60e-03	4.10e-01	no	down	_	_	_	_	_
c105292_g1	4.00	52.00	0.391	4.946	3.36	9.67e-03	4.12e-01	no	up	_	_	_	_	_
c113345_g1	35.00	2.00	2.309	0.133	-3.37	9.74e-03	4.15e-01	no	down	_	_	_	_	_
c100366_g2	2719.00	301.00	212.888	22.986	-3.21	9.77e-03	4.15e-01	no	down	_	_	_	_	_
c101361_g2	28.00	259.00	5.523	53.960	3.27	9.77e-03	4.15e-01	no	up	_	_	_	_	_
c119075_g2	13.00	129.00	4.313	40.382	3.20	9.96e-03	4.23e-01	no	up	_	_	_	_	_
c124799_g1	47.00	411.00	1.124	10.341	3.09	1.00e-02	4.24e-01	no	up	hypothetical protein LOTGIDRAFT_233458 [Lottia gigantea]	RecName: Full=Temptin; Flags: Precursor	_	DBH	PF03712.12|Cu2_monoox_C|Copper type II ascorbate-dependent monooxygenase, C-terminal domain|m.57861:287-429;PF01082.17|Cu2_monooxygen|Copper type II ascorbate-dependent monooxygenase, N-terminal domain|m.57861:153-266
c122132_g1	4.00	51.00	0.110	1.370	2.81	1.02e-02	4.32e-01	no	up	_	_	_	_	_
c105932_g1	4.00	51.00	1.197	6.619	2.37	1.02e-02	4.32e-01	no	up	_	_	_	_	_
c97331_g1	4.00	51.00	0.660	8.220	3.45	1.02e-02	4.32e-01	no	up	_	_	_	_	_
c120910_g4	79.00	7.00	8.260	0.861	-3.12	1.02e-02	4.32e-01	no	down	_	_	_	_	_
c122475_g1	15.00	145.00	0.403	3.855	2.98	1.02e-02	4.32e-01	no	up	PREDICTED: E3 ubiquitin-protein ligase TRIM71-like [Saccoglossus kowalevskii]	_	_	NEURL4	PF07177.9|Neuralized|Neuralized|m.16697:367-431;PF13920.3|zf-C3HC4_3|Zinc finger, C3HC4 type (RING finger)|m.16697:15-61;PF00097.22|zf-C3HC4|Zinc finger, C3HC4 type (RING finger)|m.16697:18-57;PF13445.3|zf-RING_UBOX|RING-type zinc-finger|m.16697:18-55;PF14447.3|Prok-RING_4|Prokaryotic RING finger family 4|m.16697:18-62;PF13639.3|zf-RING_2|Ring finger domain|m.16697:17-58;PF00643.21|zf-B_box|B-box…
c112045_g2	21.00	195.00	1.234	11.202	3.08	1.03e-02	4.35e-01	no	up	_	_	_	_	_
c127254_g2	3.00	42.00	0.220	3.019	3.28	1.04e-02	4.35e-01	no	up	_	_	_	_	_
c116595_g1	3.00	42.00	0.147	2.000	3.09	1.04e-02	4.35e-01	no	up	_	_	_	_	_
c69720_g1	44.00	3.00	82.587	4.716	-4.10	1.04e-02	4.35e-01	no	down	_	_	_	_	_
c115394_g1	6.00	68.00	0.086	0.909	2.44	1.04e-02	4.35e-01	no	up	hypothetical protein CAPTEDRAFT_192917 [Capitella teleta]	RecName: Full=E3 ubiquitin-protein ligase RNF213 [Mus musculus]	_	_	_
c114482_g1	131.00	13.00	7.331	0.618	-3.37	1.04e-02	4.36e-01	no	down	unnamed protein product [Blastocystis hominis]	_	_	RPGR	PF15633.3|Tox-ART-HYD1|HYD1 signature containing ADP-ribosyltransferase|m.37426:50-122
c123158_g8	8.00	85.00	0.599	3.964	2.54	1.05e-02	4.37e-01	no	up	_	_	_	_	_
c104396_g1	11.00	110.00	0.758	7.395	3.13	1.07e-02	4.45e-01	no	up	_	_	_	_	_
c107370_g1	11.00	110.00	2.774	25.628	3.16	1.07e-02	4.45e-01	no	up	glycoprotein hormone alpha subunit [Aplysia californica]	_	_	_	_
c174263_g1	25.00	1.00	2.395	0.097	-3.66	1.07e-02	4.47e-01	no	down	hypothetical protein [Paramecium tetraurelia strain d4-2]	_	_	_	_
c107631_g3	2898.00	336.00	246.343	27.835	-3.14	1.12e-02	4.67e-01	no	down	Caprin-2 [Crassostrea gigas]	_	_	_	PF00386.18|C1q|C1q domain|m.39146:57-165
c105288_g2	4.00	49.00	0.513	6.037	3.32	1.15e-02	4.76e-01	no	up	_	_	_	_	_
c98186_g1	2.00	33.00	0.073	1.164	2.87	1.15e-02	4.76e-01	no	up	_	_	_	_	PF13895.3|Ig_2|Immunoglobulin domain|m.226:137-221;PF07679.13|I-set|Immunoglobulin I-set domain|m.226:136-221
c94367_g1	33.00	2.00	4.240	0.255	-3.61	1.15e-02	4.76e-01	no	down	_	_	_	_	_
c130112_g1	33.00	2.00	1.173	0.048	-3.10	1.15e-02	4.76e-01	no	down	Tfp pilus assembly protein, tip-associated adhesin PilY1 [Candidatus Accumulibacter sp. SK-02]	_	_	_	_
c98862_g1	33.00	2.00	2.908	0.121	-3.77	1.15e-02	4.76e-01	no	down	_	_	_	_	_
c117616_g1	563.00	4492.00	21.456	163.906	2.93	1.19e-02	4.91e-01	no	up	_	_	_	_	PF00092.25|VWA|von Willebrand factor type A domain|m.73245:37-205;PF13519.3|VWA_2|von Willebrand factor type A domain|m.73245:37-147
c104478_g2	3.00	40.00	0.232	3.007	3.23	1.19e-02	4.91e-01	no	up	hypothetical protein HELRODRAFT_70493, partial [Helobdella robusta]	_	_	_	_
c83537_g1	1.00	24.00	0.061	1.443	3.26	1.20e-02	4.94e-01	no	up	_	_	_	_	_
c72435_g1	1.00	24.00	0.305	1.540	2.02	1.20e-02	4.94e-01	no	up	_	_	_	_	_
c109637_g1	24.00	1.00	0.941	0.036	-2.94	1.20e-02	4.94e-01	no	down	_	_	_	_	_
c80344_g1	24.00	1.00	3.116	0.133	-3.79	1.20e-02	4.94e-01	no	down	_	_	_	_	_
c36904_g1	4.00	48.00	6.012	62.798	3.36	1.21e-02	4.98e-01	no	up	_	_	_	_	_
c126694_g1	12.00	112.00	0.293	2.485	2.72	1.23e-02	5.01e-01	no	up	_	_	_	_	_
c126787_g1	37.00	303.00	0.953	7.662	2.88	1.24e-02	5.08e-01	no	up	PREDICTED: uncharacterized protein LOC101845031 [Aplysia californica]	RecName: Full=Hemicentin-1; AltName: Full=Fibulin-6; Short=FIBL-6; Flags: Precursor [Homo sapiens]	_	HMCN	PF00090.16|TSP_1|Thrombospondin type 1 domain|m.28256:110-160;PF00090.16|TSP_1|Thrombospondin type 1 domain|m.28256:168-217;PF00090.16|TSP_1|Thrombospondin type 1 domain|m.28256:225-274;PF07699.10|Ephrin_rec_like|Putative ephrin-receptor like|m.28256:509-549;PF00008.24|EGF|EGF-like domain|m.28256:69-98
c129102_g1	205.00	23.00	12.158	1.030	-3.44	1.25e-02	5.08e-01	no	down	_	_	_	_	PF13927.3|Ig_3|Immunoglobulin domain|m.8664:348-408;PF07679.13|I-set|Immunoglobulin I-set domain|m.8664:345-416
c113367_g4	85.00	684.00	6.427	50.493	2.95	1.25e-02	5.08e-01	no	up	Collectin-12 [Crassostrea gigas]	_	_	MRC	PF00059.18|Lectin_C|Lectin C-type domain|m.31098:35-139
c113555_g1	32.00	2.00	0.745	0.048	-2.51	1.26e-02	5.12e-01	no	down	PREDICTED: sterile alpha motif domain-containing protein 9-like isoform X1 [Aplysia californica]	RecName: Full=Sterile alpha motif domain-containing protein 9; Short=SAM domain-containing protein 9 [Homo sapiens]	_	_	_
c114029_g2	32.00	2.00	68.609	3.661	-4.19	1.26e-02	5.12e-01	no	down	_	_	_	_	_
c113944_g1	46.00	371.00	2.884	22.755	2.94	1.28e-02	5.19e-01	no	up	PREDICTED: uncharacterized protein LOC754701 [Strongylocentrotus purpuratus]	RecName: Full=Retrovirus-related Pol polyprotein from transposon 17.6; Includes: RecName: Full=Protease; Includes: RecName: Full=Reverse transcriptase; Includes: RecN	_	_	_
c106039_g1	3.00	39.00	6.061	4.704	-0.36	1.28e-02	5.19e-01	no	down	_	_	_	_	_
c106989_g1	5.00	55.00	0.623	4.279	2.60	1.29e-02	5.21e-01	no	up	_	_	_	_	_
c88475_g1	57.00	5.00	6.317	0.752	-2.91	1.29e-02	5.21e-01	no	down	_	_	_	_	_
c126858_g1	766.00	92.00	24.108	3.128	-2.91	1.29e-02	5.21e-01	no	down	_	_	_	_	PF00386.18|C1q|C1q domain|m.53135:210-341
c125406_g1	6.00	63.00	0.196	2.000	2.83	1.29e-02	5.21e-01	no	up	_	_	_	_	_
c110532_g1	7.00	71.00	0.342	3.431	3.00	1.29e-02	5.21e-01	no	up	PREDICTED: E3 ubiquitin-protein ligase RNF213-like [Neolamprologus brichardi]	_	_	_	_
c113304_g1	7.00	71.00	0.758	6.680	2.98	1.29e-02	5.21e-01	no	up	_	_	_	_	_
c125563_g1	185.00	21.00	4.888	0.630	-2.77	1.31e-02	5.25e-01	no	down	_	_	_	_	_
c121590_g1	105.00	828.00	3.910	30.211	2.92	1.31e-02	5.28e-01	no	up	Kappa-type opioid receptor [Crassostrea gigas]	_	_	_	PF00386.18|C1q|C1q domain|m.37317:64-191
c114363_g2	50.00	395.00	4.680	35.994	2.92	1.35e-02	5.39e-01	no	up	_	_	_	_	_
c123822_g1	3639.00	27718.00	270.255	1963.126	2.86	1.35e-02	5.39e-01	no	up	hypothetical protein CGI_10021496 [Crassostrea gigas]	_	_	_	_
c115678_g2	1.00	23.00	0.086	1.879	3.41	1.36e-02	5.39e-01	no	up	_	_	_	_	_
c103284_g1	1.00	23.00	0.257	6.062	4.11	1.36e-02	5.39e-01	no	up	_	_	_	_	_
c99670_g1	1.00	23.00	0.159	3.516	3.80	1.36e-02	5.39e-01	no	up	_	_	_	_	_
c105778_g1	1.00	23.00	0.073	1.649	3.34	1.36e-02	5.39e-01	no	up	hypothetical protein LOTGIDRAFT_118446 [Lottia gigantea]	_	annotation not available	_	PF01300.15|Sua5_yciO_yrdC|Telomere recombination|m.71348:41-225
c125943_g4	1.00	23.00	0.012	0.509	2.44	1.36e-02	5.39e-01	no	up	_	_	_	_	PF07679.13|I-set|Immunoglobulin I-set domain|m.65462:741-815
c106502_g1	1.00	23.00	0.110	2.546	3.66	1.36e-02	5.39e-01	no	up	_	_	_	_	_
c73307_g2	23.00	1.00	1.405	0.061	-3.22	1.36e-02	5.39e-01	no	down	PREDICTED: short/branched chain specific acyl-CoA dehydrogenase, mitochondrial-like [Oryzias latipes]	RecName: Full=Short/branched chain specific acyl-CoA dehydrogenase, mitochondrial; Short=SBCAD; AltName: Full=2-methyl branched chain acyl-CoA dehydrogenase; Short	acyl-Coenzyme A dehydrogenase, short/branched chain	ACADSB	PF02770.16|Acyl-CoA_dh_M|Acyl-CoA dehydrogenase, middle domain|m.18659:161-256;PF02771.13|Acyl-CoA_dh_N|Acyl-CoA dehydrogenase, N-terminal domain|m.18659:46-156
c113707_g1	1664.00	205.00	43.096	5.213	-3.02	1.36e-02	5.40e-01	no	down	PREDICTED: von Willebrand factor D and EGF domain-containing protein-like [Saccoglossus kowalevskii]	_	_	_	_
c107007_g1	2.00	31.00	0.098	1.528	3.04	1.38e-02	5.45e-01	no	up	_	_	_	_	_
c120249_g1	2.00	31.00	0.073	1.503	3.21	1.38e-02	5.45e-01	no	up	_	_	_	_	_
c105856_g1	31.00	2.00	17.131	1.018	-3.95	1.38e-02	5.45e-01	no	down	_	_	_	_	_
c116829_g3	71.00	7.00	2.077	0.182	-2.95	1.40e-02	5.55e-01	no	down	hypothetical protein LOTGIDRAFT_61530, partial [Lottia gigantea]	_	_	_	PF01966.19|HD|HD domain|m.68771:156-306
c73940_g1	71.00	7.00	7.612	15.978	1.06	1.40e-02	5.55e-01	no	up	_	_	_	_	_
c117237_g1	313.00	37.00	68.987	7.795	-3.13	1.42e-02	5.59e-01	no	down	_	_	_	_	_
c113487_g2	6.00	61.00	0.525	5.189	3.08	1.42e-02	5.59e-01	no	up	_	_	_	_	_
c119268_g2	80.00	614.00	4.313	29.375	2.74	1.44e-02	5.65e-01	no	up	GTPase IMAP family member 4 [Crassostrea gigas]	RecName: Full=GTPase IMAP family member 4; AltName: Full=Immunity-associated nucleotide 1 protein; Short=IAN-1; AltName: Full=Immunity-associated protein 4 [Rattus n	_	_	PF04548.13|AIG1|AIG1 family|m.46489:16-210
c98440_g1	4.00	45.00	0.147	1.564	2.75	1.46e-02	5.72e-01	no	up	transposase [planctomycete putative transposase [planctomycete KSU-1]	_	_	_	PF02371.13|Transposase_20|Transposase IS116/IS110/IS902 family|m.43498:23-106
c103849_g1	47.00	4.00	1.491	0.121	-2.85	1.46e-02	5.72e-01	no	down	TCDD-inducible poly [ADP-ribose]	_	_	PARP7S	PF00644.17|PARP|Poly(ADP-ribose) polymerase catalytic domain|m.70672:166-346;PF02825.17|WWE|WWE domain|m.70672:56-120
c107266_g1	1220.00	154.00	133.075	15.881	-3.06	1.47e-02	5.75e-01	no	down	PREDICTED: very low-density lipoprotein receptor-like [Apis mellifera]	RecName: Full=Low-density lipoprotein receptor; Short=LDL receptor; Flags: Precursor [Mus musculus]	_	LDLR	_
c126927_g1	371.00	45.00	11.363	2.800	-1.98	1.47e-02	5.76e-01	no	down	_	_	_	_	_
c96600_g2	39.00	3.00	3.678	0.279	-3.32	1.48e-02	5.79e-01	no	down	elongation factor 1 alpha [Dictyostelium discoideum]	RecName: Full=Elongation factor 1-alpha; Short=EF-1-alpha; AltName: Full=50 kDa actin-binding protein; AltName: Full=ABP-50 [Dictyostelium 55054074	elongation factor 1 alpha	EEF1A	_
c121566_g2	453.00	56.00	35.752	4.546	-2.95	1.50e-02	5.85e-01	no	down	PREDICTED: low-density lipoprotein receptor-related protein 4-like [Aplysia californica]	_	_	LDLR	PF00058.14|Ldl_recept_b|Low-density lipoprotein receptor repeat class B|m.58890:127-165;PF00058.14|Ldl_recept_b|Low-density lipoprotein receptor repeat class B|m.58890:171-209
c96344_g1	2.00	30.00	0.110	1.576	3.00	1.51e-02	5.87e-01	no	up	_	_	_	_	_
c98143_g1	2.00	30.00	0.134	1.879	3.08	1.51e-02	5.87e-01	no	up	_	_	_	_	_
c108306_g1	30.00	2.00	1.515	0.097	-3.04	1.51e-02	5.87e-01	no	down	_	_	_	_	PF00629.20|MAM|MAM domain, meprin/A5/mu|m.47296:31-181
c148967_g1	30.00	2.00	4.399	0.279	-3.57	1.51e-02	5.87e-01	no	down	myosin-2 essential light chain, partial [Clonorchis sinensis]	_	Myosin-2 essential light chain Clone ZZZ83 mRNA sequence	MYL6	PF13405.3|EF-hand_6|EF-hand domain|m.40050:84-113;PF13833.3|EF-hand_8|EF-hand domain pair|m.40050:59-107
c110974_g1	54.00	5.00	7.954	2.425	-1.67	1.51e-02	5.88e-01	no	down	hypothetical protein EhV18_00156 [Emiliania huxleyi virus 18]	RecName: Full=Sulfated surface glycoprotein 185; Short=SSG 185; Flags: Precursor	_	_	_
c107775_g10	54.00	5.00	6.561	0.594	-3.26	1.51e-02	5.88e-01	no	down	_	_	_	_	_
c74125_g1	1.00	22.00	0.073	2.061	3.64	1.53e-02	5.90e-01	no	up	_	_	_	_	_
c107684_g2	1.00	22.00	0.257	5.310	3.92	1.53e-02	5.90e-01	no	up	_	_	_	_	_
c108247_g1	1.00	22.00	0.086	1.746	3.31	1.53e-02	5.90e-01	no	up	_	_	_	_	_
c108021_g1	1.00	22.00	0.073	3.710	4.46	1.53e-02	5.90e-01	no	up	_	_	_	_	_
c123636_g3	1.00	22.00	0.415	8.607	4.08	1.53e-02	5.90e-01	no	up	_	_	_	_	_
c123668_g4	22.00	1.00	1.332	0.061	-3.15	1.53e-02	5.90e-01	no	down	_	_	_	_	_
c108857_g1	22.00	1.00	7.991	0.339	-4.20	1.53e-02	5.90e-01	no	down	hypothetical protein LOTGIDRAFT_158430 [Lottia gigantea]	RecName: Full=Endoglucanase A; AltName: Full=Cellulase A; AltName: Full=Endo-1,4-beta-glucanase A; Flags: Precursor	_	_	PF00759.16|Glyco_hydro_9|Glycosyl hydrolase family 9|m.22499:3-94
c98541_g1	46.00	4.00	3.873	0.327	-3.22	1.55e-02	5.96e-01	no	down	_	_	_	_	_
c110717_g1	137.00	16.00	13.868	2.679	-2.33	1.55e-02	5.96e-01	no	down	_	_	_	_	_
c118254_g1	137.00	16.00	3.983	0.461	-2.86	1.55e-02	5.96e-01	no	down	Poly [ADP-ribose]	_	_	PARP10_14_15	PF00644.17|PARP|Poly(ADP-ribose) polymerase catalytic domain|m.54870:405-590;PF01661.18|Macro|Macro domain|m.54870:29-141
c124256_g2	91.00	10.00	4.325	0.461	-2.98	1.56e-02	5.97e-01	no	down	_	_	_	_	_
c116763_g2	32.00	251.00	2.823	21.531	2.89	1.56e-02	5.99e-01	no	up	_	_	_	_	PF00822.17|PMP22_Claudin|PMP-22/EMP/MP20/Claudin family|m.9372:10-160
c116315_g1	57.00	424.00	2.835	21.070	2.85	1.59e-02	6.10e-01	no	up	PREDICTED: type-2 ice-structuring protein-like [Xiphophorus maculatus]	_	_	CLEC10A, CLECSF13, CLECSF14	PF00059.18|Lectin_C|Lectin C-type domain|m.53008:49-156
c125670_g1	8.00	73.00	0.318	2.085	2.39	1.62e-02	6.19e-01	no	up	PREDICTED: short-chain collagen C4-like [Amphimedon queenslandica]	_	_	_	_
c125163_g1	433.00	55.00	12.940	1.612	-2.93	1.63e-02	6.21e-01	no	down	_	_	_	_	_
c113184_g1	9.00	80.00	0.819	7.104	2.97	1.64e-02	6.26e-01	no	up	_	_	_	_	_
c102461_g1	4.00	43.00	0.208	2.146	2.87	1.65e-02	6.29e-01	no	up	_	_	_	_	_
c126294_g1	490.00	63.00	28.152	3.540	-2.96	1.65e-02	6.29e-01	no	down	amphiCASP-3/7 [Branchiostoma floridae]	RecName: Full=Caspase-7; Short=CASP-7; AltName: Full=Apoptotic protease Mch-3; AltName: Full=Cysteine protease LICE2; Contains: RecName: Full=Caspase-7 subunit p20;	_	CASP7	PF00656.19|Peptidase_C14|Caspase domain|m.72305:42-279
c66305_g2	2.00	29.00	6.097	73.843	3.58	1.66e-02	6.30e-01	no	up	_	_	_	_	_
c78755_g1	29.00	2.00	3.018	0.206	-3.35	1.66e-02	6.30e-01	no	down	_	_	_	_	_
c122589_g1	155.00	19.00	4.484	0.485	-2.97	1.69e-02	6.40e-01	no	down	_	_	_	_	_
c123110_g2	566.00	74.00	26.136	3.346	-2.93	1.70e-02	6.44e-01	no	down	Endothelial cells scavenger receptor [Crassostrea gigas]	_	_	_	PF00754.22|F5_F8_type_C|F5/8 type C domain|m.56065:84-158
c115440_g1	176.00	22.00	12.781	1.734	-2.81	1.71e-02	6.47e-01	no	down	_	_	_	_	_
c116833_g2	32.00	243.00	2.456	18.197	2.84	1.72e-02	6.47e-01	no	up	_	_	_	_	_
c122527_g1	59.00	6.00	3.922	0.352	-3.15	1.72e-02	6.47e-01	no	down	_	_	_	_	_
c130499_g1	59.00	6.00	2.432	0.230	-2.94	1.72e-02	6.47e-01	no	down	_	_	_	_	_
c102866_g1	3.00	36.00	0.318	3.649	3.16	1.72e-02	6.48e-01	no	up	_	_	_	_	_
c125522_g3	3.00	36.00	0.880	10.062	3.37	1.72e-02	6.48e-01	no	up	_	_	_	_	_
c95881_g1	36.00	3.00	11.730	0.921	-3.53	1.72e-02	6.48e-01	no	down	PREDICTED: secretory phospholipase A2 receptor [Orycteropus afer afer]	_	_	MRC	PF00059.18|Lectin_C|Lectin C-type domain|m.46842:44-113
c91795_g1	1.00	21.00	0.733	7.492	3.19	1.74e-02	6.51e-01	no	up	_	_	_	_	_
c112417_g1	1.00	21.00	0.086	1.843	3.38	1.74e-02	6.51e-01	no	up	_	_	_	_	_
c113204_g5	21.00	1.00	7.331	0.327	-4.12	1.74e-02	6.51e-01	no	down	hypothetical protein LOTGIDRAFT_236237 [Lottia gigantea]	_	_	_	_
c129351_g3	21.00	1.00	2.859	0.133	-3.67	1.74e-02	6.51e-01	no	down	_	_	_	_	_
c109601_g1	21.00	1.00	1.356	0.061	-3.18	1.74e-02	6.51e-01	no	down	_	_	_	_	_
c118922_g1	18.00	142.00	0.269	2.255	2.67	1.75e-02	6.52e-01	no	up	_	_	_	_	_
c120949_g1	109.00	13.00	2.370	0.279	-2.70	1.75e-02	6.52e-01	no	down	_	_	_	_	_
c120318_g1	588.00	78.00	29.631	3.382	-3.09	1.76e-02	6.55e-01	no	down	_	_	_	_	_
c3127_g1	4.00	42.00	0.367	3.734	3.04	1.76e-02	6.55e-01	no	up	_	_	_	_	_
c120279_g1	10289.00	1402.00	379.125	50.687	-2.90	1.77e-02	6.59e-01	no	down	PREDICTED: deleted in malignant brain tumors 1 protein-like [Strongylocentrotus purpuratus]	RecName: Full=Scavenger receptor cysteine-rich type 1 protein M130; AltName: CD_antigen=CD163; Contains: RecName: Full=Soluble CD163; Short=sCD163; Flags: Precurs	_	_	PF00530.15|SRCR|Scavenger receptor cysteine-rich domain|m.60050:109-157;PF00530.15|SRCR|Scavenger receptor cysteine-rich domain|m.60050:193-291;PF00530.15|SRCR|Scavenger receptor cysteine-rich domain|m.60050:303-403
c114628_g1	51.00	5.00	2.285	0.218	-2.91	1.79e-02	6.62e-01	no	down	Protein odd-skipped-related 1 [Crassostrea gigas]	RecName: Full=Protein odd-skipped-related 1; Short=XOsr1	odd-skipped related 1 (Drosophila)	OSR, ODD	PF13912.3|zf-C2H2_6|C2H2-type zinc finger|m.8458:237-261
c107604_g1	152.00	19.00	23.546	1.843	-3.61	1.79e-02	6.62e-01	no	down	_	_	_	_	_
c112301_g3	116.00	14.00	2.896	0.897	-1.59	1.80e-02	6.68e-01	no	down	_	_	_	_	_
c70940_g1	16.00	126.00	0.648	4.971	2.76	1.81e-02	6.70e-01	no	up	_	_	_	_	_
c106153_g1	18.00	140.00	2.358	17.797	2.86	1.82e-02	6.72e-01	no	up	_	_	_	_	_
c123847_g1	2.00	28.00	0.208	2.897	3.28	1.83e-02	6.72e-01	no	up	_	_	_	_	_
c108745_g2	2.00	28.00	0.635	8.462	3.54	1.83e-02	6.72e-01	no	up	_	_	_	_	_
c33447_g1	2.00	28.00	0.342	4.655	3.43	1.83e-02	6.72e-01	no	up	_	_	_	_	_
c130032_g3	2.00	28.00	0.196	7.565	4.69	1.83e-02	6.72e-01	no	up	_	_	_	_	_
c121488_g2	28.00	2.00	0.978	0.073	-2.64	1.83e-02	6.72e-01	no	down	_	_	_	_	_
c130554_g5	38.00	271.00	1.601	14.451	3.10	1.85e-02	6.78e-01	no	up	PREDICTED: uncharacterized protein LOC101862849 isoform X1 [Aplysia californica]	_	_	_	_
c118655_g2	3.00	35.00	0.477	5.298	3.23	1.86e-02	6.83e-01	no	up	_	_	_	_	PF12478.5|DUF3697|Ubiquitin-associated protein 2|m.37721:3-26
c107684_g1	35.00	3.00	1.393	0.121	-2.76	1.86e-02	6.83e-01	no	down	_	_	_	_	_
c113460_g3	137.00	948.00	19.623	84.353	2.10	1.87e-02	6.83e-01	no	up	PREDICTED: complement C1q tumor necrosis factor-related protein 3-like isoform 1 [Oryzias latipes]	_	_	_	PF00386.18|C1q|C1q domain|m.8955:52-174
c123825_g1	530.00	3619.00	10.520	70.836	2.74	1.88e-02	6.89e-01	no	up	cytochrome P450, family 3, subfamily A, polypeptide 5 [Xenopus laevis]	RecName: Full=Cytochrome P450 3A43 [Homo sapiens]	_	CYP3A	PF00067.19|p450|Cytochrome P450|m.43217:41-511
c130176_g1	369.00	2523.00	8.077	54.312	2.73	1.88e-02	6.89e-01	no	up	hypothetical protein LOTGIDRAFT_218395 [Lottia gigantea]	_	_	VNN	PF00795.19|CN_hydrolase|Carbon-nitrogen hydrolase|m.38693:63-239
c105755_g1	6.00	55.00	0.330	10.099	4.57	1.89e-02	6.91e-01	no	up	_	_	_	_	_
c108017_g1	6.00	55.00	0.440	4.013	2.93	1.89e-02	6.91e-01	no	up	C-type lectin A [Azumapecten farreri]	RecName: Full=Pulmonary surfactant-associated protein D; Short=PSP-D; Short=SP-D; AltName: Full=Lung surfactant protein D; Flags: Precursor [Mus musculus]	_	COLEC12	PF00059.18|Lectin_C|Lectin C-type domain|m.3049:46-154
c122801_g2	9.00	76.00	0.574	4.777	2.86	1.90e-02	6.91e-01	no	up	_	_	_	_	_
c101613_g1	337.00	45.00	27.126	3.528	-2.91	1.95e-02	7.09e-01	no	down	_	_	_	_	_
c108725_g1	31.00	225.00	1.051	6.886	2.60	1.96e-02	7.12e-01	no	up	Exonuclease 3'-5' domain-containing protein 1 [Crassostrea gigas]	_	_	EXD1, EGL	PF01612.17|DNA_pol_A_exo1|3'-5' exonuclease|m.33575:5-193
c108520_g5	103.00	705.00	8.492	56.640	2.72	1.98e-02	7.15e-01	no	up	_	_	_	_	_
c100399_g1	7.00	61.00	0.269	8.911	4.61	1.98e-02	7.15e-01	no	up	hypothetical protein M514_10253 [Trichuris suis]	_	_	_	_
c107614_g1	7.00	61.00	1.515	9.990	2.64	1.98e-02	7.15e-01	no	up	hypothetical protein RO3G_09300 [Rhizopus delemar RA 99-880]	_	_	_	_
c102288_g1	1.00	20.00	0.122	2.340	3.46	1.99e-02	7.15e-01	no	up	_	_	_	_	_
c112953_g7	1.00	20.00	0.257	4.837	3.79	1.99e-02	7.15e-01	no	up	_	_	_	_	_
c115172_g1	20.00	1.00	1.344	0.061	-3.16	1.99e-02	7.15e-01	no	down	_	_	_	_	_
c117960_g1	20.00	1.00	1.271	0.061	-3.09	1.99e-02	7.15e-01	no	down	_	_	_	_	_
c74633_g2	20.00	1.00	2.774	0.133	-3.62	1.99e-02	7.15e-01	no	down	tubulin alpha chain [Dugesia japonica]	RecName: Full=Tubulin alpha chain	_	TUBA	PF00091.22|Tubulin|Tubulin/FtsZ family, GTPase domain|m.8125:16-216
c90656_g1	20.00	1.00	2.309	0.097	-3.61	1.99e-02	7.15e-01	no	down	_	_	_	_	_
c102326_g1	56.00	6.00	1.711	0.182	-2.68	1.99e-02	7.16e-01	no	down	_	_	_	_	_
c92102_g1	42.00	4.00	10.215	0.921	-3.34	2.01e-02	7.23e-01	no	down	_	_	_	_	_
c113057_g1	1305.00	8675.00	63.220	411.596	2.70	2.02e-02	7.24e-01	no	up	hypothetical protein BRAFLDRAFT_101110 [Branchiostoma floridae]	_	_	_	PF06462.9|Hyd_WA|Propeller|m.67851:88-117;PF06462.9|Hyd_WA|Propeller|m.67851:131-160
c128681_g2	125.00	16.00	5.132	1.758	-1.49	2.03e-02	7.27e-01	no	down	_	_	_	_	_
c123279_g1	159.00	21.00	87.022	10.596	-3.03	2.03e-02	7.27e-01	no	down	_	_	_	_	_
c104643_g1	1085.00	154.00	121.186	16.694	-2.85	2.06e-02	7.38e-01	no	down	_	_	_	_	_
c104986_g1	96.00	12.00	4.851	0.594	-2.83	2.07e-02	7.40e-01	no	down	hypothetical protein LOTGIDRAFT_84942, partial [Lottia gigantea]	RecName: Full=Coagulation factor XI; Short=FXI; AltName: Full=Plasma thromboplastin antecedent; Short=PTA; Contains: RecName: Full=Coagulation factor XIa heavy cha	_	PLG	PF00089.23|Trypsin|Trypsin|m.59438:54-282;PF09342.8|DUF1986|Domain of unknown function (DUF1986)|m.59438:66-179
c129238_g2	6.00	53.00	1.478	12.390	2.98	2.10e-02	7.49e-01	no	up	_	_	_	_	_
c99024_g1	18.00	132.00	0.819	5.904	2.71	2.14e-02	7.64e-01	no	up	_	_	_	_	_
c120902_g1	88.00	11.00	2.041	0.303	-2.41	2.15e-02	7.67e-01	no	down	_	_	_	_	_
c117843_g1	493.00	3208.00	17.852	95.701	2.42	2.16e-02	7.68e-01	no	up	PREDICTED: cytochrome P450 4F4-like isoform X1 [Aplysia californica]	RecName: Full=Cytochrome P450 4B1; AltName: Full=CYPIVB1; AltName: Full=Cytochrome P450 isozyme 5	_	CYP4B1	PF00067.19|p450|Cytochrome P450|m.1872:68-502
c129113_g2	60.00	400.00	1.796	11.723	2.64	2.19e-02	7.78e-01	no	up	hypothetical protein LOTGIDRAFT_139886, partial [Lottia gigantea]	RecName: Full=Disrupted in renal carcinoma protein 2 homolog [Mus musculus]	_	DIRC2, SLC49A3	PF07690.13|MFS_1|Major Facilitator Superfamily|m.42747:58-459;PF13347.3|MFS_2|MFS/sugar transport protein|m.42747:177-425
c91117_g1	33.00	3.00	3.531	0.315	-3.13	2.19e-02	7.78e-01	no	down	PREDICTED: 60S ribosomal protein L7a-like [Lepisosteus oculatus]	RecName: Full=60S ribosomal protein L7a [Gallus gallus]	LOC447981 protein (Fragment)	RP-L7Ae, RPL7A	PF01248.23|Ribosomal_L7Ae|Ribosomal protein L7Ae/L30e/S12e/Gadd45 family|m.46034:135-214
c111191_g2	33.00	3.00	2.016	0.182	-2.91	2.19e-02	7.78e-01	no	down	_	_	_	_	_
c103785_g2	54.00	6.00	3.250	0.352	-2.89	2.21e-02	7.83e-01	no	down	PREDICTED: sphingosine 1-phosphate receptor 5 [Trichechus manatus latirostris]	RecName: Full=D(4) dopamine receptor; AltName: Full=D(2C) dopamine receptor; AltName: Full=Dopamine D4 receptor [Mus musculus]	_	S1PR5, EDG8	PF00001.18|7tm_1|7 transmembrane receptor (rhodopsin family)|m.47759:45-299;PF10320.6|7TM_GPCR_Srsx|Serpentine type 7TM GPCR chemoreceptor Srsx|m.47759:42-312;PF13853.3|7tm_4|Olfactory receptor|m.47759:37-308
c113312_g1	107.00	14.00	4.277	0.594	-2.66	2.21e-02	7.84e-01	no	down	_	_	_	_	_
c102811_g1	875.00	127.00	49.767	7.031	-2.81	2.23e-02	7.88e-01	no	down	Protein SpAN [Crassostrea gigas]	_	_	_	PF00059.18|Lectin_C|Lectin C-type domain|m.40263:48-154
c110703_g6	67.00	8.00	8.981	1.030	-3.01	2.24e-02	7.88e-01	no	down	_	_	_	_	_
c95760_g1	2.00	26.00	2.187	25.289	3.47	2.24e-02	7.88e-01	no	up	_	_	_	_	_
c112116_g2	26.00	2.00	7.588	0.558	-3.55	2.24e-02	7.88e-01	no	down	Matrilin-2 [Crassostrea gigas]	_	_	_	_
c126900_g2	26.00	2.00	8.235	0.667	-3.44	2.24e-02	7.88e-01	no	down	_	_	_	_	_
c188071_g1	393.00	56.00	128.114	17.227	-2.89	2.25e-02	7.91e-01	no	down	_	_	_	_	_
c122551_g1	836.00	122.00	60.556	9.844	-2.61	2.27e-02	7.95e-01	no	down	_	_	_	_	_
c99856_g2	1.00	19.00	0.122	2.146	3.34	2.28e-02	7.95e-01	no	up	_	_	_	_	_
c100680_g1	19.00	1.00	2.505	0.133	-3.48	2.28e-02	7.95e-01	no	down	_	_	_	_	_
c105718_g3	19.00	1.00	2.285	0.121	-3.43	2.28e-02	7.95e-01	no	down	_	_	_	_	_
c125632_g1	19.00	1.00	0.623	0.024	-2.54	2.28e-02	7.95e-01	no	down	PREDICTED: cell division control protein 45 homolog [Aplysia californica]	RecName: Full=Cell division control protein 45 homolog; AltName: Full=PORC-PI-1 [Homo sapiens]	_	CDC45	PF02724.11|CDC45|CDC45-like protein|m.57663:30-123;PF02724.11|CDC45|CDC45-like protein|m.57663:149-568
c98326_g1	19.00	1.00	2.285	0.121	-3.43	2.28e-02	7.95e-01	no	down	Tyrosine-protein kinase receptor Tie-1 [Crassostrea gigas]	_	_	_	_
c113356_g1	19.00	1.00	1.063	0.061	-2.85	2.28e-02	7.95e-01	no	down	_	_	_	_	_
c114969_g1	69.00	452.00	1.650	10.620	2.61	2.28e-02	7.95e-01	no	up	hypothetical protein BRAFLDRAFT_86061 [Branchiostoma floridae]	RecName: Full=Ryncolin-1; Flags: Precursor	_	FCN	PF00147.15|Fibrinogen_C|Fibrinogen beta and gamma chains, C-terminal globular domain|m.15098:315-521;PF07686.14|V-set|Immunoglobulin V-set domain|m.15098:38-130
c105874_g1	9.00	71.00	0.892	6.813	2.80	2.29e-02	7.99e-01	no	up	_	_	_	_	_
c121234_g2	4.00	38.00	0.318	3.467	3.09	2.31e-02	8.04e-01	no	up	_	_	_	_	_
c126461_g1	388.00	56.00	10.484	1.261	-2.96	2.33e-02	8.11e-01	no	down	_	_	_	_	_
c100366_g1	1833.00	273.00	350.337	50.081	-2.80	2.34e-02	8.12e-01	no	down	_	_	_	_	_
c110191_g10	46.00	5.00	2.102	0.630	-1.59	2.39e-02	8.31e-01	no	down	_	_	_	_	_
c130125_g2	14.00	102.00	0.403	2.922	2.59	2.40e-02	8.32e-01	no	up	_	_	_	_	_
c127337_g2	701.00	105.00	24.804	3.601	-2.75	2.42e-02	8.37e-01	no	down	_	_	_	_	_
c112536_g1	2551.00	389.00	73.520	11.008	-2.73	2.47e-02	8.54e-01	no	down	hypothetical protein LOTGIDRAFT_228200 [Lottia gigantea]	_	_	_	PF13688.3|Reprolysin_5|Metallo-peptidase family M12|m.56233:200-391;PF01421.16|Reprolysin|Reprolysin (M12B) family zinc metalloprotease|m.56233:236-417;PF13582.3|Reprolysin_3|Metallo-peptidase family M12B Reprolysin-like|m.56233:237-369;PF13583.3|Reprolysin_4|Metallo-peptidase family M12B Reprolysin-like|m.56233:266-390
c114419_g1	38.00	4.00	16.165	5.940	-1.43	2.48e-02	8.57e-01	no	down	hypothetical protein CGI_10026547 [Crassostrea gigas]	_	_	_	_
c107548_g1	2.00	25.00	0.098	1.127	2.63	2.49e-02	8.58e-01	no	up	_	_	_	_	_
c107998_g1	2.00	25.00	0.159	1.964	2.99	2.49e-02	8.58e-01	no	up	_	_	_	_	_
c123074_g1	99.00	625.00	7.673	34.272	2.14	2.49e-02	8.58e-01	no	up	PREDICTED: tetraspanin-18-like [Saccoglossus kowalevskii]	_	_	_	PF00335.17|Tetraspannin|Tetraspanin family|m.34738:10-239
c100852_g1	2356.00	14447.00	117.203	703.826	2.59	2.53e-02	8.72e-01	no	up	hypothetical protein LOTGIDRAFT_235672 [Lottia gigantea]	RecName: Full=Hemicentin-1; AltName: Full=Fibulin-6; Short=FIBL-6; Flags: Precursor [Homo sapiens]	_	_	PF00090.16|TSP_1|Thrombospondin type 1 domain|m.48402:61-118;PF00090.16|TSP_1|Thrombospondin type 1 domain|m.48402:135-183;PF00090.16|TSP_1|Thrombospondin type 1 domain|m.48402:193-250;PF01607.21|CBM_14|Chitin binding Peritrophin-A domain|m.48402:254-298
c121638_g2	5.00	43.00	0.538	4.437	2.83	2.55e-02	8.76e-01	no	up	_	_	_	_	_
c117651_g1	1551.00	239.00	64.760	9.650	-2.73	2.56e-02	8.81e-01	no	down	Chlorophyllase-2 [Crassostrea gigas]	_	_	_	PF12740.4|Chlorophyllase2|Chlorophyllase enzyme|m.71560:49-286;PF07224.8|Chlorophyllase|Chlorophyllase|m.71560:30-305
c117976_g1	3.00	31.00	0.464	4.631	3.07	2.60e-02	8.91e-01	no	up	_	_	_	_	_
c112428_g1	3.00	31.00	0.086	0.885	2.40	2.60e-02	8.91e-01	no	up	_	_	_	_	PF12773.4|DZR|Double zinc ribbon|m.23417:4-54
c119399_g4	441.00	67.00	56.622	8.329	-2.75	2.63e-02	9.03e-01	no	down	_	_	_	_	_
c121196_g2	226.00	34.00	9.763	1.467	-2.65	2.66e-02	9.12e-01	no	down	deoxycytidylate deaminase [Capsaspora owczarzaki ATCC 30864]	_	similar to dCMP deaminase	comEB	PF00383.20|dCMP_cyt_deam_1|Cytidine and deoxycytidylate deaminase zinc-binding region|m.55358:27-147;PF00383.20|dCMP_cyt_deam_1|Cytidine and deoxycytidylate deaminase zinc-binding region|m.55358:215-326;PF14437.3|MafB19-deam|MafB19-like deaminase|m.55358:27-150;PF14437.3|MafB19-deam|MafB19-like deaminase|m.55358:215-351
c102171_g1	4.00	37.00	0.269	2.461	2.80	2.67e-02	9.12e-01	no	up	_	_	_	_	_
c115246_g1	44.00	5.00	5.364	0.594	-2.98	2.71e-02	9.26e-01	no	down	_	_	_	_	_
c129039_g1	50.00	6.00	2.102	0.170	-3.03	2.74e-02	9.36e-01	no	down	reverse transcriptase (RNA-dependent DNA polymerase) [Trypanosoma vivax Y486]	RecName: Full=Putative uncharacterized transposon-derived protein ZK1236.4	_	_	PF00078.24|RVT_1|Reverse transcriptase (RNA-dependent DNA polymerase)|m.7828:134-364
c105588_g1	2.00	24.00	3.397	1.200	-1.43	2.77e-02	9.42e-01	no	down	_	_	_	_	_
c95498_g1	24.00	2.00	1.747	0.145	-2.91	2.77e-02	9.42e-01	no	down	hypothetical protein [Paramecium tetraurelia strain d4-2]	_	_	CPK	PF00036.29|EF-hand_1|EF hand|m.27340:129-156;PF00036.29|EF-hand_1|EF hand|m.27340:236-258;PF13202.3|EF-hand_5|EF hand|m.27340:28-47;PF13202.3|EF-hand_5|EF hand|m.27340:60-80;PF13202.3|EF-hand_5|EF hand|m.27340:98-120;PF13202.3|EF-hand_5|EF hand|m.27340:131-151;PF13202.3|EF-hand_5|EF hand|m.27340:167-185;PF13202.3|EF-hand_5|EF hand|m.27340:201-217;PF13202.3|EF-hand_5|EF hand|m.27340:237-259;PF1320…
c107641_g2	24.00	2.00	1.430	0.097	-2.96	2.77e-02	9.42e-01	no	down	_	_	_	_	_
c104874_g1	24.00	2.00	1.234	0.097	-2.76	2.77e-02	9.42e-01	no	down	_	_	_	_	_
c78779_g1	24.00	2.00	2.920	0.206	-3.30	2.77e-02	9.42e-01	no	down	_	_	_	_	_
c123403_g1	124.00	18.00	2.102	0.849	-1.21	2.78e-02	9.45e-01	no	down	hypothetical protein MDA_GLEAN10007261 [Myotis davidii]	RecName: Full=N66 matrix protein; Flags: Precursor	_	_	_
c119626_g1	12.00	84.00	17.131	104.769	2.61	2.82e-02	9.56e-01	no	up	conserved hypothetical protein [Ricinus communis]	_	_	_	_
c104821_g4	4.00	36.00	2.383	2.194	-0.11	2.87e-02	9.72e-01	no	down	_	_	_	_	_
c108354_g1	5.00	41.00	0.428	3.407	2.73	2.89e-02	9.76e-01	no	up	Serine proteinase stubble [Harpegnathos saltator]	RecName: Full=Tryptase-2; Flags: Precursor [Ovis aries]	_	_	PF00089.23|Trypsin|Trypsin|m.12333:2-59
c118842_g1	5.00	41.00	0.672	5.977	2.98	2.89e-02	9.76e-01	no	up	_	_	_	_	PF08210.8|APOBEC_N|APOBEC-like N-terminal domain|m.64110:4-93
c111151_g2	7.00	53.00	0.635	4.704	2.71	2.91e-02	9.81e-01	no	up	_	_	_	_	_
c125297_g1	8.00	59.00	0.354	2.546	2.54	2.91e-02	9.81e-01	no	up	_	_	_	_	_
c114985_g2	16.00	107.00	0.538	3.443	2.47	2.92e-02	9.82e-01	no	up	_	_	_	_	_
c100049_g1	257.00	1511.00	7.356	42.516	2.51	2.92e-02	9.83e-01	no	up	_	_	_	_	_
c107155_g1	1460.00	236.00	75.695	11.978	-2.65	2.93e-02	9.87e-01	no	down	_	_	_	_	PF00054.20|Laminin_G_1|Laminin G domain|m.58556:208-289
c97228_g1	163.00	25.00	6.671	1.006	-2.61	2.96e-02	9.95e-01	no	down	_	_	_	_	_
c117012_g1	109.00	646.00	85.067	456.258	2.42	2.96e-02	9.95e-01	no	up	_	_	_	_	_
c115524_g1	1232.00	7129.00	46.566	264.298	2.50	2.98e-02	1.00e+00	no	up	_	_	_	_	_
c109779_g1	11.00	76.00	1.246	8.377	2.65	3.02e-02	1.00e+00	no	up	_	_	_	_	_
c120714_g2	276.00	43.00	62.157	9.250	-2.74	3.03e-02	1.00e+00	no	down	hypothetical protein LOTGIDRAFT_233462 [Lottia gigantea]	RecName: Full=Peptidoglycan recognition protein 1; Flags: Precursor	annotation not available	E3.5.1.28	PF01510.22|Amidase_2|N-acetylmuramoyl-L-alanine amidase|m.62617:21-116
c107631_g1	9.00	64.00	2.468	17.676	2.79	3.04e-02	1.00e+00	no	up	PREDICTED: complement C1q-like protein 2 [Poecilia formosa]	_	_	_	PF00386.18|C1q|C1q domain|m.70762:76-108
c107439_g1	9.00	64.00	0.403	2.073	2.11	3.04e-02	1.00e+00	no	up	_	_	_	_	_
c116631_g1	9.00	64.00	0.367	2.097	2.23	3.04e-02	1.00e+00	no	up	PREDICTED: tyramine beta-hydroxylase-like, partial [Aplysia californica]	_	_	_	PF03712.12|Cu2_monoox_C|Copper type II ascorbate-dependent monooxygenase, C-terminal domain|m.67403:309-444;PF01082.17|Cu2_monooxygen|Copper type II ascorbate-dependent monooxygenase, N-terminal domain|m.67403:174-288
c105077_g1	60.00	8.00	4.093	0.533	-2.73	3.05e-02	1.00e+00	no	down	_	_	_	_	_
c122673_g1	44.00	261.00	1.967	10.426	2.35	3.06e-02	1.00e+00	no	up	_	_	_	_	_
c125805_g2	101.00	15.00	6.097	0.885	-2.65	3.08e-02	1.00e+00	no	down	_	_	_	_	PF01607.21|CBM_14|Chitin binding Peritrophin-A domain|m.51432:4-42
c108560_g2	5.00	40.00	0.367	3.552	2.97	3.08e-02	1.00e+00	no	up	_	_	_	_	_
c120439_g3	35.00	4.00	2.175	0.242	-2.73	3.09e-02	1.00e+00	no	down	_	_	_	_	_
c74576_g1	2.00	23.00	0.171	1.831	2.83	3.10e-02	1.00e+00	no	up	_	_	_	_	_
c99193_g1	2.00	23.00	0.134	1.552	2.82	3.10e-02	1.00e+00	no	up	_	_	_	_	_
c97115_g1	2.00	23.00	0.501	5.431	3.20	3.10e-02	1.00e+00	no	up	_	_	_	_	_
c130859_g1	23.00	2.00	2.419	0.206	-3.04	3.10e-02	1.00e+00	no	down	_	_	_	_	_
c115849_g3	23.00	2.00	54.203	3.334	-3.98	3.10e-02	1.00e+00	no	down	_	_	_	_	_
c99554_g1	29.00	3.00	3.287	0.327	-2.99	3.10e-02	1.00e+00	no	down	_	_	_	_	_
c115353_g1	29.00	3.00	1.320	0.133	-2.61	3.10e-02	1.00e+00	no	down	_	_	_	_	_
c107697_g1	52.00	306.00	7.759	44.092	2.49	3.12e-02	1.00e+00	no	up	_	_	_	_	_
c117237_g2	1066.00	176.00	143.852	22.961	-2.64	3.12e-02	1.00e+00	no	down	PREDICTED: antistasin-like [Aplysia californica]	_	_	_	_
c118429_g2	19.00	120.00	2.823	17.239	2.57	3.18e-02	1.00e+00	no	up	_	_	_	_	_
c112279_g1	7.00	51.00	0.562	4.558	2.81	3.22e-02	1.00e+00	no	up	_	_	_	_	_
c122373_g2	53.00	7.00	1.625	0.206	-2.49	3.22e-02	1.00e+00	no	down	transposon Ty3-G gap-Pol polyprotein [Clonorchis sinensis]	RecName: Full=Retrovirus-related Pol polyprotein from transposon 297; Includes: RecName: Full=Protease; Includes: RecName: Full=Reverse transcriptase; Includes: RecNa	similar to gag-pol polyprotein	_	PF00078.24|RVT_1|Reverse transcriptase (RNA-dependent DNA polymerase)|m.24002:220-376
c114861_g1	11.00	74.00	0.403	2.643	2.45	3.24e-02	1.00e+00	no	up	PREDICTED: deoxyribonuclease gamma-like [Oryzias latipes]	RecName: Full=Histone H2B H2B_DROSE RecName: Full=Histone H2B [Drosophila sechellia]	GJ23530; Core component of nucleosome. Nucleosomes wrap and compact DNA into chromatin, limi [...]	DNASE1L	PF00125.21|Histone|Core histone H2A/H2B/H3/H4|m.18094:291-402;PF03372.20|Exo_endo_phos|Endonuclease/Exonuclease/phosphatase family|m.18094:18-243;PF00808.20|CBFD_NFYB_HMF|Histone-like transcription factor (CBF/NF-Y) and archaeal histone|m.18094:343-400
c120893_g1	223.00	1256.00	6.488	35.873	2.45	3.29e-02	1.00e+00	no	up	TRC8-like protein [Zootermopsis nevadensis]	RecName: Full=E3 ubiquitin-protein ligase AMFR; AltName: Full=Autocrine motility factor receptor; Short=AMF receptor; AltName: Full=RING finger protein 45; AltName:	_	_	PF13639.3|zf-RING_2|Ring finger domain|m.77850:338-377;PF13923.3|zf-C3HC4_2|Zinc finger, C3HC4 type (RING finger)|m.77850:339-376;PF13920.3|zf-C3HC4_3|Zinc finger, C3HC4 type (RING finger)|m.77850:336-382;PF00097.22|zf-C3HC4|Zinc finger, C3HC4 type (RING finger)|m.77850:339-376;PF14447.3|Prok-RING_4|Prokaryotic RING finger family 4|m.77850:339-384;PF13445.3|zf-RING_UBOX|RING-type zinc-finger|m.77…
c86858_g1	41.00	238.00	15.176	88.633	2.54	3.29e-02	1.00e+00	no	up	_	_	_	_	_
c126161_g1	41.00	238.00	1.185	6.862	2.44	3.29e-02	1.00e+00	no	up	PREDICTED: uncharacterized protein LOC101862922 [Aplysia californica]	RecName: Full=Nose resistant to fluoxetine protein 6; Short=Protein nrf-6; Flags: Precursor [Caenorhabditis elegans]	_	_	PF01757.19|Acyl_transf_3|Acyltransferase family|m.21798:347-547
c108327_g1	5.00	39.00	0.281	2.146	2.56	3.29e-02	1.00e+00	no	up	_	_	_	_	_
c111145_g1	64.00	9.00	1.931	0.267	-2.47	3.30e-02	1.00e+00	no	down	Cathepsin L [Crassostrea gigas]	RecName: Full=Digestive cysteine proteinase 2; Flags: Precursor [Homarus americanus]	_	CTSL	PF00112.20|Peptidase_C1|Papain family cysteine protease|m.25278:81-298
c124173_g1	1478.00	250.00	35.068	5.831	-2.57	3.31e-02	1.00e+00	no	down	HSP70 [Pomacea canaliculata]	RecName: Full=Heat shock protein 70 B2 [Anopheles albimanus]	heat shock protein 70 B2	HSPA1_8	PF00012.17|HSP70|Hsp70 protein|m.72035:6-608;PF06723.10|MreB_Mbl|MreB/Mbl protein|m.72035:138-375
c110673_g1	12.00	79.00	1.869	11.844	2.60	3.33e-02	1.00e+00	no	up	_	_	_	_	_
c99009_g1	81.00	12.00	10.276	1.467	-2.73	3.33e-02	1.00e+00	no	down	_	_	_	_	_
c94240_g2	34.00	4.00	2.334	0.267	-2.73	3.34e-02	1.00e+00	no	down	collagen type I/II/III/V/XI alpha [Clonorchis sinensis]	RecName: Full=Collagen alpha-2(V) chain; Flags: Precursor [Homo sapiens]	_	COL5AS	PF01391.15|Collagen|Collagen triple helix repeat (20 copies)|m.10806:85-142;PF01391.15|Collagen|Collagen triple helix repeat (20 copies)|m.10806:191-247;PF01391.15|Collagen|Collagen triple helix repeat (20 copies)|m.10806:244-300
c91259_g1	34.00	4.00	0.696	0.085	-2.11	3.34e-02	1.00e+00	no	down	_	_	_	_	_
c128502_g1	566.00	95.00	27.847	2.922	-3.21	3.36e-02	1.00e+00	no	down	_	_	_	_	_
c119812_g1	11.00	73.00	1.674	6.559	1.91	3.36e-02	1.00e+00	no	up	_	_	_	_	_
c126953_g2	24.00	146.00	2.077	12.329	2.51	3.37e-02	1.00e+00	no	up	_	_	_	_	_
c126831_g1	17.00	107.00	1.051	4.013	1.84	3.38e-02	1.00e+00	no	up	_	_	_	_	_
c98189_g2	3.00	28.00	0.208	1.576	2.44	3.41e-02	1.00e+00	no	up	hypothetical protein LOTGIDRAFT_64655, partial [Lottia gigantea]	_	_	GCNT3	PF02485.18|Branch|Core-2/I-Branching enzyme|m.35792:117-359
c101970_g1	28.00	3.00	5.376	0.558	-3.06	3.41e-02	1.00e+00	no	down	_	_	_	_	_
c104924_g1	28.00	3.00	1.601	0.170	-2.66	3.41e-02	1.00e+00	no	down	_	_	_	_	_
c122717_g2	13.00	84.00	1.503	9.359	2.56	3.41e-02	1.00e+00	no	up	_	_	_	_	_
c104319_g1	86.00	13.00	12.121	1.637	-2.81	3.41e-02	1.00e+00	no	down	_	_	_	_	_
c111908_g1	246.00	40.00	11.400	1.831	-2.57	3.43e-02	1.00e+00	no	down	PREDICTED: uncharacterized protein LOC101847244 [Aplysia californica]	_	_	_	PF01607.21|CBM_14|Chitin binding Peritrophin-A domain|m.28198:109-153;PF01607.21|CBM_14|Chitin binding Peritrophin-A domain|m.28198:181-233
c120943_g2	80.00	12.00	3.177	0.473	-2.52	3.44e-02	1.00e+00	no	down	_	_	_	_	_
c99935_g2	2.00	22.00	0.293	3.310	3.12	3.48e-02	1.00e+00	no	up	_	_	_	_	_
c122224_g3	2.00	22.00	0.257	2.764	3.00	3.48e-02	1.00e+00	no	up	_	_	_	_	_
c110120_g1	40.00	5.00	2.871	0.352	-2.72	3.52e-02	1.00e+00	no	down	_	_	_	_	_
c115584_g2	277.00	46.00	16.446	2.667	-2.58	3.56e-02	1.00e+00	no	down	_	_	_	_	_
c111451_g3	180.00	30.00	77.162	11.990	-2.68	3.58e-02	1.00e+00	no	down	_	_	_	_	_
c110335_g4	62.00	9.00	24.853	3.370	-2.85	3.60e-02	1.00e+00	no	down	_	_	_	_	_
c108927_g1	4.00	33.00	0.379	3.673	2.98	3.62e-02	1.00e+00	no	up	_	_	_	_	_
c100674_g1	33.00	4.00	1.808	0.182	-2.76	3.62e-02	1.00e+00	no	down	_	_	_	_	_
c125718_g1	90.00	496.00	6.500	29.253	2.15	3.64e-02	1.00e+00	no	up	_	_	_	_	_
c115758_g1	45.00	6.00	3.678	0.473	-2.72	3.66e-02	1.00e+00	no	down	_	_	_	_	_
c105896_g1	18.00	109.00	1.747	10.268	2.49	3.69e-02	1.00e+00	no	up	_	_	_	_	_
c55337_g1	27.00	3.00	2.151	0.230	-2.77	3.74e-02	1.00e+00	no	down	hypothetical protein T265_05921 [Opisthorchis viverrini]	_	_	COL5AS	PF01410.15|COLFI|Fibrillar collagen C-terminal domain|m.67574:75-272;PF01391.15|Collagen|Collagen triple helix repeat (20 copies)|m.67574:1-59
c123445_g3	438.00	76.00	24.242	4.122	-2.53	3.75e-02	1.00e+00	no	down	_	_	_	_	_
c114387_g1	83.00	13.00	5.621	0.764	-2.73	3.75e-02	1.00e+00	no	down	PREDICTED: LOW QUALITY PROTEIN: general transcription factor II-I repeat domain-containing protein 2B-like [Chrysemys picta bellii]	_	_	_	_
c122524_g1	9.00	59.00	0.696	4.486	2.53	3.77e-02	1.00e+00	no	up	_	_	_	_	_
c105583_g1	18.00	108.00	14.382	78.013	2.43	3.79e-02	1.00e+00	no	up	_	_	_	_	_
c106591_g1	77.00	12.00	10.190	1.540	-2.65	3.82e-02	1.00e+00	no	down	_	_	_	_	_
c116387_g2	336.00	58.00	9.506	1.721	-2.40	3.83e-02	1.00e+00	no	down	PREDICTED: vacuole membrane protein 1-like [Aplysia californica]	RecName: Full=Vacuole membrane protein 1; AltName: Full=Transmembrane protein 49	_	_	_
c109918_g3	10.00	64.00	0.929	5.759	2.51	3.84e-02	1.00e+00	no	up	_	_	_	_	_
c117144_g1	66.00	10.00	5.474	0.800	-2.63	3.84e-02	1.00e+00	no	down	_	_	_	_	_
c99748_g2	148.00	25.00	13.233	2.182	-2.55	3.87e-02	1.00e+00	no	down	_	_	_	_	_
c118862_g1	6785.00	35627.00	321.428	1653.341	2.36	3.88e-02	1.00e+00	no	up	hypothetical protein BRAFLDRAFT_97527 [Branchiostoma floridae]	_	_	_	_
c115725_g4	32.00	4.00	5.107	0.618	-2.86	3.92e-02	1.00e+00	no	down	_	_	_	_	_
c118674_g1	2.00	21.00	0.122	1.297	2.65	3.92e-02	1.00e+00	no	up	_	_	_	_	_
c105934_g3	21.00	2.00	2.871	0.267	-3.02	3.92e-02	1.00e+00	no	down	_	_	_	_	_
c132716_g1	21.00	2.00	2.407	0.218	-2.98	3.92e-02	1.00e+00	no	down	citrate synthase [Fasciola hepatica]	RecName: Full=Probable citrate synthase 2, mitochondrial; Flags: Precursor [Aedes aegypti]	Citrate synthase	CS, gltA	PF00285.18|Citrate_synt|Citrate synthase, C-terminal domain|m.47436:70-243
c106817_g1	21.00	2.00	2.041	0.194	-2.86	3.92e-02	1.00e+00	no	down	_	_	_	_	_
c105119_g1	21.00	2.00	0.623	0.061	-2.17	3.92e-02	1.00e+00	no	down	PREDICTED: uncharacterized threonine-rich GPI-anchored glycoprotein PJ4664.02-like [Apis dorsata]	_	_	CLCA4	PF01607.21|CBM_14|Chitin binding Peritrophin-A domain|m.58182:202-253;PF01607.21|CBM_14|Chitin binding Peritrophin-A domain|m.58182:355-405;PF01607.21|CBM_14|Chitin binding Peritrophin-A domain|m.58182:434-485
c104255_g2	21.00	2.00	1.393	0.133	-2.68	3.92e-02	1.00e+00	no	down	_	_	_	_	_
c122228_g1	937.00	168.00	38.465	6.850	-2.47	3.93e-02	1.00e+00	no	down	PREDICTED: uncharacterized protein LOC101848762 [Aplysia californica]	_	_	COL6A	PF00092.25|VWA|von Willebrand factor type A domain|m.52760:129-299;PF13519.3|VWA_2|von Willebrand factor type A domain|m.52760:130-241;PF13768.3|VWA_3|von Willebrand factor type A domain|m.52760:129-281;PF03128.11|CXCXC|CXCXC repeat|m.52760:68-80
c66305_g3	33.00	185.00	14.039	73.430	2.38	3.94e-02	1.00e+00	no	up	reverse transcriptase [Limulus polyphemus]	_	_	_	_
c103328_g3	152.00	26.00	24.132	3.976	-2.57	3.97e-02	1.00e+00	no	down	_	_	_	_	_
c122969_g1	4439.00	806.00	215.466	38.309	-2.49	3.98e-02	1.00e+00	no	down	_	_	_	_	_
c121547_g1	108.00	18.00	1.430	0.230	-2.21	3.98e-02	1.00e+00	no	down	hypothetical protein LOTGIDRAFT_128569, partial [Lottia gigantea]	_	_	_	PF01607.21|CBM_14|Chitin binding Peritrophin-A domain|m.4174:970-1020
c98800_g2	7.00	47.00	0.538	3.491	2.49	3.98e-02	1.00e+00	no	up	_	_	_	_	PF01607.21|CBM_14|Chitin binding Peritrophin-A domain|m.9636:5-50;PF01607.21|CBM_14|Chitin binding Peritrophin-A domain|m.9636:68-112;PF01607.21|CBM_14|Chitin binding Peritrophin-A domain|m.9636:144-182
c96495_g1	49.00	7.00	3.776	0.521	-2.64	3.98e-02	1.00e+00	no	down	_	_	_	_	_
c110892_g1	49.00	7.00	1.625	0.230	-2.39	3.98e-02	1.00e+00	no	down	_	_	_	_	_
c118811_g3	157.00	27.00	9.066	1.479	-2.54	3.99e-02	1.00e+00	no	down	_	_	_	_	_
c114205_g1	8379.00	43556.00	522.537	2653.495	2.34	3.99e-02	1.00e+00	no	up	Caprin-2 [Crassostrea gigas]	RecName: Full=Complement C1q-like protein 4; AltName: Full=C1q and tumor necrosis factor-related protein 11; Short=C1q/TNF-related protein 11; Flags: Precursor [Ho	_	_	PF00386.18|C1q|C1q domain|m.16061:88-196
c125716_g1	1059.00	191.00	32.490	5.759	-2.48	4.01e-02	1.00e+00	no	down	_	_	_	_	_
c100590_g1	37.00	5.00	3.824	0.679	-2.33	4.04e-02	1.00e+00	no	down	hypothetical protein ENH_00027880, partial [Eimeria necatrix]	_	_	UPF1, RENT1	PF00754.22|F5_F8_type_C|F5/8 type C domain|m.37730:38-141
c122288_g1	221.00	38.00	15.701	3.746	-2.04	4.04e-02	1.00e+00	no	down	_	_	_	_	_
c110532_g2	3.00	26.00	0.635	5.261	2.87	4.13e-02	1.00e+00	no	up	_	_	_	_	_
c94858_g1	3.00	26.00	0.122	0.994	2.30	4.13e-02	1.00e+00	no	up	_	_	_	_	_
c127008_g2	43.00	6.00	4.851	0.655	-2.71	4.14e-02	1.00e+00	no	down	_	_	_	_	PF00619.18|CARD|Caspase recruitment domain|m.42278:8-87
c115215_g1	43.00	6.00	3.409	0.424	-2.74	4.14e-02	1.00e+00	no	down	_	_	_	_	_
c102400_g1	255.00	1320.00	9.653	49.002	2.33	4.14e-02	1.00e+00	no	up	hypothetical protein LOTGIDRAFT_172473 [Lottia gigantea]	RecName: Full=Arylacetamide deacetylase [Bos taurus]	_	NCEH1, AADACL1	PF07859.10|Abhydrolase_3|alpha/beta hydrolase fold|m.21309:111-256;PF07859.10|Abhydrolase_3|alpha/beta hydrolase fold|m.21309:315-386;PF10340.6|DUF2424|Protein of unknown function (DUF2424)|m.21309:106-211
c105812_g1	1564.00	287.00	92.423	16.585	-2.47	4.14e-02	1.00e+00	no	down	antistasin-like protein [Haliotis discus discus]	_	_	_	PF02822.11|Antistasin|Antistasin family|m.26503:29-54;PF02822.11|Antistasin|Antistasin family|m.26503:60-84
c126964_g2	21.00	119.00	1.210	4.486	1.81	4.16e-02	1.00e+00	no	up	PREDICTED: integrin alpha-9 [Zonotrichia albicollis]	RecName: Full=Integrin alpha-9; AltName: Full=Integrin alpha-RLC; Flags: Precursor [Homo sapiens]	_	ITGA9	_
c119433_g1	64.00	10.00	7.392	1.127	-2.61	4.17e-02	1.00e+00	no	down	_	_	_	_	_
c111266_g3	208.00	36.00	8.859	1.503	-2.48	4.17e-02	1.00e+00	no	down	_	_	_	_	_
c90696_g1	48.00	7.00	1.576	0.230	-2.34	4.21e-02	1.00e+00	no	down	fem-1-like protein C [Crassostrea gigas]	RecName: Full=Protein fem-1 homolog CG6966 [Drosophila melanogaster]	_	_	PF12796.4|Ank_2|Ankyrin repeats (3 copies)|m.13508:26-130;PF12796.4|Ank_2|Ankyrin repeats (3 copies)|m.13508:136-195;PF12796.4|Ank_2|Ankyrin repeats (3 copies)|m.13508:208-262;PF13606.3|Ank_3|Ankyrin repeat|m.13508:137-162;PF13606.3|Ank_3|Ankyrin repeat|m.13508:167-195;PF13606.3|Ank_3|Ankyrin repeat|m.13508:208-234;PF13637.3|Ank_4|Ankyrin repeats (many copies)|m.13508:103-155;PF13637.3|Ank_4|Anky…
c120744_g1	90.00	15.00	4.851	0.691	-2.65	4.21e-02	1.00e+00	no	down	_	_	_	_	_
c109527_g1	11.00	67.00	1.393	9.517	2.69	4.22e-02	1.00e+00	no	up	Nose resistant to fluoxetine protein 6 [Crassostrea gigas]	_	_	_	_
c98164_g1	514.00	94.00	139.942	24.307	-2.52	4.23e-02	1.00e+00	no	down	PREDICTED: very low-density lipoprotein receptor [Melopsittacus undulatus]	RecName: Full=Very low-density lipoprotein receptor; Short=VLDL receptor; Short=VLDL-R; AltName: Full=Vitellogenin receptor; Short=VTG receptor; Flags: Precursor	_	_	_
c123740_g1	682.00	125.00	20.650	3.576	-2.50	4.25e-02	1.00e+00	no	down	_	_	_	_	_
c60338_g1	74.00	12.00	11.608	1.818	-2.61	4.25e-02	1.00e+00	no	down	RecName: Full=Fatty acid-binding protein type 3 fatty acid binding protein [Fasciola hepatica]	RecName: Full=Fatty acid-binding protein type 3	_	FABP3	PF00061.20|Lipocalin|Lipocalin / cytosolic fatty-acid binding protein family|m.60808:13-138
c127774_g1	31.00	4.00	1.185	0.121	-2.54	4.26e-02	1.00e+00	no	down	_	_	_	_	_
c107985_g1	13.00	77.00	1.197	6.886	2.43	4.29e-02	1.00e+00	no	up	_	_	_	_	PF02221.12|E1_DerP2_DerF2|ML domain|m.25727:98-182
c124335_g1	147.00	26.00	14.357	1.794	-2.93	4.34e-02	1.00e+00	no	down	_	_	_	_	_
c125257_g3	5.00	36.00	0.367	2.606	2.53	4.34e-02	1.00e+00	no	up	_	_	_	_	_
c119132_g1	63.00	10.00	1.637	0.255	-2.29	4.35e-02	1.00e+00	no	down	_	_	_	_	_
c117556_g2	65.00	336.00	1.735	9.117	2.33	4.37e-02	1.00e+00	no	up	hypothetical protein LOTGIDRAFT_122459, partial [Lottia gigantea]	RecName: Full=Zinc finger protein 510 [Homo sapiens]	_	KRAB	PF00096.23|zf-C2H2|Zinc finger, C2H2 type|m.2760:116-138;PF00096.23|zf-C2H2|Zinc finger, C2H2 type|m.2760:198-219;PF13894.3|zf-C2H2_4|C2H2-type zinc finger|m.2760:116-138;PF13894.3|zf-C2H2_4|C2H2-type zinc finger|m.2760:198-219;PF12874.4|zf-met|Zinc-finger of C2H2 type|m.2760:116-136;PF12874.4|zf-met|Zinc-finger of C2H2 type|m.2760:198-217;PF12874.4|zf-met|Zinc-finger of C2H2 type|m.2760:253-273;…
c102764_g1	157.00	28.00	25.012	4.304	-2.51	4.37e-02	1.00e+00	no	down	_	_	_	_	_
c124211_g4	11.00	66.00	6.134	33.897	2.45	4.38e-02	1.00e+00	no	up	catalase [Eisenia fetida]	RecName: Full=Catalase [Drosophila melanogaster]	_	katE, CAT, catB, srpA	PF00199.16|Catalase|Catalase|m.42881:1-121
c117593_g1	11.00	66.00	0.269	1.564	2.17	4.38e-02	1.00e+00	no	up	hypothetical protein LOTGIDRAFT_189041 [Lottia gigantea]	_	_	CYP26C	PF00067.19|p450|Cytochrome P450|m.64877:78-494
c117246_g1	6.00	40.00	0.281	1.843	2.35	4.40e-02	1.00e+00	no	up	_	_	_	_	_
c119984_g1	12.00	71.00	2.004	5.771	1.48	4.41e-02	1.00e+00	no	up	_	_	_	_	_
c111360_g1	13126.00	2485.00	704.658	130.567	-2.43	4.43e-02	1.00e+00	no	down	_	_	_	_	_
c121388_g1	43.00	223.00	1.918	9.796	2.29	4.44e-02	1.00e+00	no	up	_	_	_	_	_
c78832_g1	2.00	20.00	0.159	1.600	2.71	4.44e-02	1.00e+00	no	up	_	_	_	_	_
c121591_g2	2.00	20.00	1.100	10.959	3.20	4.44e-02	1.00e+00	no	up	_	_	_	_	_
c106453_g2	2.00	20.00	0.220	2.109	2.79	4.44e-02	1.00e+00	no	up	_	_	_	_	PF13927.3|Ig_3|Immunoglobulin domain|m.45385:136-213;PF07679.13|I-set|Immunoglobulin I-set domain|m.45385:134-226
c49763_g1	2.00	20.00	0.171	1.673	2.71	4.44e-02	1.00e+00	no	up	_	_	_	_	PF00643.21|zf-B_box|B-box zinc finger|m.15550:93-136
c64240_g1	20.00	2.00	3.433	0.327	-3.05	4.44e-02	1.00e+00	no	down	hypothetical protein BRAFLDRAFT_69722 [Branchiostoma floridae]	RecName: Full=40S ribosomal protein S3a [Salmo salar]	hypothetical protein	RP-S3Ae, RPS3A	PF01015.15|Ribosomal_S3Ae|Ribosomal S3Ae family|m.27965:1-149
c120549_g1	20.00	2.00	2.603	0.255	-2.93	4.44e-02	1.00e+00	no	down	_	_	_	_	_
c128180_g2	20.00	2.00	2.529	0.242	-2.94	4.44e-02	1.00e+00	no	down	_	_	_	_	_
c111030_g1	20.00	2.00	0.831	0.085	-2.33	4.44e-02	1.00e+00	no	down	_	_	_	_	_
c119692_g2	83.00	14.00	3.934	0.667	-2.39	4.46e-02	1.00e+00	no	down	_	_	_	_	_
c126204_g2	3660.00	18175.00	15.493	75.831	2.28	4.52e-02	1.00e+00	no	up	PREDICTED: amidophosphoribosyltransferase-like isoform X4 [Aplysia californica]	RecName: Full=Amidophosphoribosyltransferase; Short=ATase; AltName: Full=Glutamine phosphoribosylpyrophosphate amidotransferase; Short=GPAT; Flags: Precursor [Gallus	hypothetical LOC582049	purF, PPAT	PF13522.3|GATase_6|Glutamine amidotransferase domain|m.60464:87-214;PF13537.3|GATase_7|Glutamine amidotransferase domain|m.60464:108-214;PF00156.24|Pribosyltran|Phosphoribosyl transferase domain|m.60464:319-421;PF13230.3|GATase_4|Glutamine amidotransferases class-II|m.60464:87-156
c130615_g5	57.00	9.00	1.906	0.291	-2.36	4.52e-02	1.00e+00	no	down	hypothetical protein CAPTEDRAFT_196769 [Capitella teleta]	_	_	TRPM5	PF00520.28|Ion_trans|Ion transport protein|m.56547:87-352
c119561_g1	119.00	21.00	2.737	0.436	-2.40	4.55e-02	1.00e+00	no	down	hypothetical protein BRAFLDRAFT_118927 [Branchiostoma floridae]	RecName: Full=Kynurenine--oxoglutarate transaminase 3; AltName: Full=Cysteine-S-conjugate beta-lyase 2; AltName: Full=Kynurenine aminotransferase III; Short=KATIII	cysteine conjugate-beta lyase 2	CCBL	PF00155.18|Aminotran_1_2|Aminotransferase class I and II|m.11052:6-242
c90121_g1	3.00	25.00	0.281	2.231	2.61	4.56e-02	1.00e+00	no	up	_	_	_	_	_
c117005_g2	3.00	25.00	0.159	1.321	2.46	4.56e-02	1.00e+00	no	up	_	_	_	_	_
c116943_g3	3.00	25.00	0.269	2.170	2.62	4.56e-02	1.00e+00	no	up	_	_	_	_	_
c99059_g1	3.00	25.00	0.196	1.552	2.48	4.56e-02	1.00e+00	no	up	hypothetical protein BRAFLDRAFT_154067 [Branchiostoma floridae]	RecName: Full=NFX1-type zinc finger-containing protein 1 [Homo sapiens]	_	_	_
c106389_g3	25.00	3.00	2.053	0.230	-2.71	4.56e-02	1.00e+00	no	down	_	_	_	_	PF00041.18|fn3|Fibronectin type III domain|m.53756:44-116;PF00041.18|fn3|Fibronectin type III domain|m.53756:181-258
c121070_g1	1572.00	300.00	49.132	11.990	-2.03	4.59e-02	1.00e+00	no	down	_	_	_	_	_
c112361_g1	14.00	80.00	1.112	6.219	2.38	4.60e-02	1.00e+00	no	up	_	_	_	_	PF08210.8|APOBEC_N|APOBEC-like N-terminal domain|m.7881:50-184
c119075_g1	15.00	85.00	1.283	7.104	2.38	4.61e-02	1.00e+00	no	up	_	_	_	_	_
c102907_g1	50.00	255.00	2.163	10.790	2.27	4.62e-02	1.00e+00	no	up	hypothetical protein LOTGIDRAFT_208974 [Lottia gigantea]	RecName: Full=Crustapain; AltName: Full=NsCys; Flags: Precursor [Pandalus borealis]	_	CTSL	PF00112.20|Peptidase_C1|Papain family cysteine protease|m.21261:118-333;PF08246.9|Inhibitor_I29|Cathepsin propeptide inhibitor domain (I29)|m.21261:34-93
c104801_g1	359.00	67.00	28.396	5.164	-2.44	4.62e-02	1.00e+00	no	down	_	_	_	_	_
c107282_g2	4.00	30.00	0.196	1.394	2.34	4.63e-02	1.00e+00	no	up	_	_	_	_	_
c129942_g2	4.00	30.00	0.086	0.618	1.95	4.63e-02	1.00e+00	no	up	hypothetical protein LOTGIDRAFT_236952 [Lottia gigantea]	_	_	_	PF01551.19|Peptidase_M23|Peptidase family M23|m.35512:82-176
c130359_g3	37.00	189.00	1.234	7.480	2.51	4.63e-02	1.00e+00	no	up	_	_	_	_	PF07686.14|V-set|Immunoglobulin V-set domain|m.26964:29-115;PF00047.22|ig|Immunoglobulin domain|m.26964:29-117
c103959_g1	20.00	110.00	3.275	26.768	2.99	4.65e-02	1.00e+00	no	up	_	_	_	_	_
c127494_g3	35.00	5.00	2.102	0.291	-2.49	4.67e-02	1.00e+00	no	down	_	_	_	_	_
c87814_g1	196.00	969.00	14.785	71.321	2.26	4.67e-02	1.00e+00	no	up	C1q-like 23kDa protein [Neoditrema ransonnetii]	_	_	_	PF00386.18|C1q|C1q domain|m.54294:88-198
c65535_g1	41.00	6.00	2.199	0.291	-2.56	4.69e-02	1.00e+00	no	down	hypothetical protein T265_10364 [Opisthorchis viverrini]	RecName: Full=Heterogeneous nuclear ribonucleoprotein F; Short=hnRNP F; Contains: RecName: Full=Heterogeneous nuclear ribonucleoprotein F, N-terminally processed [	SJCHGC02919 protein	HNRNPF_H	PF00076.19|RRM_1|RNA recognition motif. (a.k.a. RRM, RBD, or RNP domain)|m.62590:107-174;PF00076.19|RRM_1|RNA recognition motif. (a.k.a. RRM, RBD, or RNP domain)|m.62590:298-363
c97657_g1	13.00	74.00	0.415	2.340	2.24	4.75e-02	1.00e+00	no	up	_	_	_	_	_
c118714_g2	13.00	74.00	0.220	1.843	2.60	4.75e-02	1.00e+00	no	up	_	_	_	_	_
c115933_g1	96.00	17.00	9.946	1.321	-2.82	4.76e-02	1.00e+00	no	down	_	_	_	_	_
c120090_g1	21.00	113.00	1.369	7.177	2.31	4.76e-02	1.00e+00	no	up	_	_	_	_	_
c125651_g1	132.00	24.00	4.790	0.849	-2.37	4.76e-02	1.00e+00	no	down	_	_	_	_	_
c128526_g2	31.00	163.00	0.574	2.946	2.18	4.76e-02	1.00e+00	no	up	_	_	_	_	_
c127143_g1	53.00	266.00	2.651	7.056	1.38	4.76e-02	1.00e+00	no	up	hypothetical protein YQE_07671, partial [Dendroctonus ponderosae]	_	_	RAD5	PF13920.3|zf-C3HC4_3|Zinc finger, C3HC4 type (RING finger)|m.77520:7-54;PF00097.22|zf-C3HC4|Zinc finger, C3HC4 type (RING finger)|m.77520:10-49;PF14447.3|Prok-RING_4|Prokaryotic RING finger family 4|m.77520:10-53;PF00643.21|zf-B_box|B-box zinc finger|m.77520:88-132;PF13445.3|zf-RING_UBOX|RING-type zinc-finger|m.77520:10-47;PF13639.3|zf-RING_2|Ring finger domain|m.77520:9-50;PF13923.3|zf-C3HC4_2|Z…
c110147_g1	21707.00	4243.00	689.506	132.325	-2.38	4.82e-02	1.00e+00	no	down	_	_	_	_	_
c118443_g1	34.00	177.00	3.104	15.736	2.31	4.83e-02	1.00e+00	no	up	_	_	_	_	PF06140.10|Ifi-6-16|Interferon-induced 6-16 family|m.64543:42-99
c126964_g4	51.00	255.00	1.063	5.225	2.19	4.86e-02	1.00e+00	no	up	hypothetical protein LOTGIDRAFT_238706 [Lottia gigantea]	RecName: Full=Integrin alpha-4; AltName: Full=CD49 antigen-like family member D; AltName: Full=Integrin alpha-IV; AltName: Full=Lymphocyte Peyer patch adhesion molecu	_	ITGA11	PF08441.9|Integrin_alpha2|Integrin alpha|m.48921:474-844;PF01839.20|FG-GAP|FG-GAP repeat|m.48921:306-348;PF01839.20|FG-GAP|FG-GAP repeat|m.48921:384-414
c112986_g1	90.00	16.00	9.201	1.588	-2.46	4.90e-02	1.00e+00	no	down	_	_	_	_	_
c116416_g2	293.00	1417.00	18.499	87.457	2.23	4.93e-02	1.00e+00	no	up	_	_	_	_	_
c128577_g2	89.00	437.00	2.529	9.638	1.89	4.96e-02	1.00e+00	no	up	_	_	_	_	_
c113103_g2	75.00	369.00	3.140	15.142	2.23	4.97e-02	1.00e+00	no	up	PREDICTED: neuralized-like protein 4 [Nasonia vitripennis]	_	_	NEURL4	_
c113259_g1	6.00	38.00	0.318	1.940	2.29	5.01e-02	1.00e+00	no	up	_	_	_	_	_
c127008_g1	40.00	6.00	4.228	0.618	-2.59	5.01e-02	1.00e+00	no	down	PREDICTED: caspase-2-like, partial [Strongylocentrotus purpuratus]	RecName: Full=Caspase-8; Short=CASP-8; Contains: RecName: Full=Caspase-8 subunit p18; Contains: RecName: Full=Caspase-8 subunit p10; Flags: Precursor [Mus musculus	_	CASP8	PF00656.19|Peptidase_C14|Caspase domain|m.8719:23-256
c123975_g3	99.00	18.00	2.774	0.521	-2.21	5.02e-02	1.00e+00	no	down	_	_	_	_	_
c121877_g2	5.00	34.00	0.745	4.971	2.59	5.03e-02	1.00e+00	no	up	_	_	_	_	_
c105484_g2	34.00	5.00	2.542	0.364	-2.51	5.03e-02	1.00e+00	no	down	_	_	_	_	_
c112637_g2	34.00	5.00	3.910	0.558	-2.61	5.03e-02	1.00e+00	no	down	_	_	_	_	_
c110271_g1	243.00	46.00	17.583	3.249	-2.40	5.03e-02	1.00e+00	no	down	_	_	_	_	_
c82455_g1	2.00	19.00	0.428	4.098	2.99	5.04e-02	1.00e+00	no	up	_	_	_	_	_
c115722_g1	2.00	19.00	0.403	3.649	2.90	5.04e-02	1.00e+00	no	up	_	_	_	_	_
c108295_g1	2.00	19.00	0.147	1.346	2.55	5.04e-02	1.00e+00	no	up	_	_	_	_	_
c110228_g1	19.00	2.00	4.729	0.473	-3.08	5.04e-02	1.00e+00	no	down	_	_	_	_	_
c110469_g1	4.00	29.00	0.330	2.291	2.48	5.05e-02	1.00e+00	no	up	_	_	_	_	_
c99377_g1	3.00	24.00	0.305	2.364	2.61	5.06e-02	1.00e+00	no	up	_	_	_	_	_
c99392_g1	24.00	3.00	1.918	0.230	-2.61	5.06e-02	1.00e+00	no	down	_	_	_	_	PF00791.17|ZU5|ZU5 domain|m.2379:53-135
c101361_g1	126.00	607.00	17.717	82.523	2.21	5.08e-02	1.00e+00	no	up	_	_	_	_	_
c111865_g1	1114.00	221.00	66.287	13.930	-2.24	5.12e-02	1.00e+00	no	down	PREDICTED: GTPase IMAP family member 8-like [Haplochromis burtoni]	RecName: Full=GTPase IMAP family member 4; AltName: Full=Immunity-associated nucleotide 1 protein; Short=IAN-1; AltName: Full=Immunity-associated protein 4 [Mus mu	_	_	PF04548.13|AIG1|AIG1 family|m.78904:4-217;PF01926.20|MMR_HSR1|50S ribosome-binding GTPase|m.78904:7-126
c96152_g2	49.00	8.00	20.528	3.128	-2.68	5.25e-02	1.00e+00	no	down	actin beta/gamma 1 [Clonorchis sinensis]	RecName: Full=Actin, clone 403; Flags: Precursor	_	ACTB_G1	PF00022.16|Actin|Actin|m.48563:1-132
c79918_g1	161.00	31.00	25.183	4.680	-2.40	5.25e-02	1.00e+00	no	down	hypothetical protein T265_12116 [Opisthorchis viverrini]	_	SJCHGC05729 protein	RP-L11e, RPL11	PF00281.16|Ribosomal_L5|Ribosomal protein L5|m.70018:14-67;PF00673.18|Ribosomal_L5_C|ribosomal L5P family C-terminus|m.70018:71-169
c126396_g1	24.00	123.00	0.941	4.740	2.22	5.28e-02	1.00e+00	no	up	hypothetical protein CGI_10004021 [Crassostrea gigas]	_	_	_	PF05721.10|PhyH|Phytanoyl-CoA dioxygenase (PhyH)|m.32211:53-251
c98393_g3	44.00	7.00	1.637	0.255	-2.29	5.30e-02	1.00e+00	no	down	PREDICTED: toll-like receptor 3-like [Aplysia californica]	RecName: Full=Toll-like receptor 2 type-1; Flags: Precursor [Gallus gallus]	_	TLR13	PF13855.3|LRR_8|Leucine rich repeat|m.4131:178-221;PF13855.3|LRR_8|Leucine rich repeat|m.4131:223-270;PF01582.17|TIR|TIR domain|m.4131:378-496;PF13676.3|TIR_2|TIR domain|m.4131:380-474;PF00560.30|LRR_1|Leucine Rich Repeat|m.4131:76-96;PF00560.30|LRR_1|Leucine Rich Repeat|m.4131:210-232;PF13306.3|LRR_5|Leucine rich repeats (6 copies)|m.4131:147-254;PF13306.3|LRR_5|Leucine rich repeats (6 copies)|m…
c110183_g1	145.00	686.00	8.785	40.661	2.20	5.32e-02	1.00e+00	no	up	_	_	_	_	_
c123445_g2	359.00	71.00	22.263	4.304	-2.34	5.35e-02	1.00e+00	no	down	_	_	_	_	_
c96114_g1	16.00	85.00	0.843	4.413	2.26	5.35e-02	1.00e+00	no	up	PREDICTED: protocadherin Fat 4-like [Astyanax mexicanus]	RecName: Full=Desmoglein-3; AltName: Full=130 kDa pemphigus vulgaris antigen homolog; Flags: Precursor [Mus musculus]	_	FAT1_2_3	_
c124866_g1	63.00	11.00	3.886	0.655	-2.40	5.36e-02	1.00e+00	no	down	_	_	_	_	_
c115859_g2	5.00	33.00	5.181	30.429	2.53	5.42e-02	1.00e+00	no	up	PREDICTED: alpha-amylase-like [Aplysia californica]	_	_	E3.2.1.1, amyA, malS	_
c102833_g1	33.00	5.00	1.845	0.279	-2.36	5.42e-02	1.00e+00	no	down	_	_	_	_	_
c124317_g1	38.00	183.00	1.295	6.316	2.20	5.47e-02	1.00e+00	no	up	_	_	_	_	_
c121155_g3	177.00	35.00	3.592	0.655	-2.29	5.51e-02	1.00e+00	no	down	_	_	_	_	_
c91149_g2	4.00	28.00	0.330	2.279	2.47	5.51e-02	1.00e+00	no	up	_	_	_	_	_
c110697_g4	28.00	4.00	2.138	0.303	-2.47	5.51e-02	1.00e+00	no	down	_	_	_	_	_
c107853_g1	28.00	4.00	2.639	0.352	-2.60	5.51e-02	1.00e+00	no	down	PREDICTED: macrophage mannose receptor 1-like [Strongylocentrotus purpuratus]	RecName: Full=Very low-density lipoprotein receptor; Short=VLDL receptor; Short=VLDL-R; AltName: Full=Vitellogenin receptor; Short=VTG receptor; Flags: Precursor	_	MRC	PF00057.15|Ldl_recept_a|Low-density lipoprotein receptor domain class A|m.4682:52-86;PF00057.15|Ldl_recept_a|Low-density lipoprotein receptor domain class A|m.4682:244-278;PF00059.18|Lectin_C|Lectin C-type domain|m.4682:114-212
c106714_g1	28.00	4.00	2.077	0.182	-2.95	5.51e-02	1.00e+00	no	down	_	_	_	_	_
c129133_g2	28.00	4.00	2.175	0.303	-2.50	5.51e-02	1.00e+00	no	down	hypothetical protein LOTGIDRAFT_171361 [Lottia gigantea]	_	_	_	_
c88519_g1	12.00	65.00	1.185	6.243	2.30	5.53e-02	1.00e+00	no	up	_	_	_	_	_
c122768_g1	8.00	46.00	0.513	2.873	2.28	5.54e-02	1.00e+00	no	up	_	_	_	_	_
c111668_g1	48.00	8.00	6.549	1.055	-2.53	5.54e-02	1.00e+00	no	down	_	_	_	_	_
c117369_g2	48.00	8.00	20.271	3.152	-2.65	5.54e-02	1.00e+00	no	down	_	_	_	_	_
c115048_g2	48.00	228.00	1.320	6.159	2.14	5.56e-02	1.00e+00	no	up	Exonuclease 3'-5' domain-containing protein 1 [Crassostrea gigas]	_	_	_	PF01612.17|DNA_pol_A_exo1|3'-5' exonuclease|m.66803:7-194
c122453_g1	69.00	325.00	4.949	22.767	2.18	5.60e-02	1.00e+00	no	up	_	_	_	_	_
c122202_g2	1818.00	375.00	29.765	6.037	-2.28	5.61e-02	1.00e+00	no	down	PREDICTED: low-density lipoprotein receptor-related protein 4-like [Aplysia californica]	RecName: Full=Low-density lipoprotein receptor-related protein 5; Short=LRP-5; AltName: Full=Low-density lipoprotein receptor-related protein 7; Short=LRP-7; AltNa	_	LRP5_6	PF00530.15|SRCR|Scavenger receptor cysteine-rich domain|m.61565:140-239;PF00530.15|SRCR|Scavenger receptor cysteine-rich domain|m.61565:532-625;PF00058.14|Ldl_recept_b|Low-density lipoprotein receptor repeat class B|m.61565:377-417;PF00058.14|Ldl_recept_b|Low-density lipoprotein receptor repeat class B|m.61565:724-764;PF00058.14|Ldl_recept_b|Low-density lipoprotein receptor repeat class B|m.61565…
c112243_g1	3.00	23.00	0.159	1.164	2.29	5.62e-02	1.00e+00	no	up	_	_	_	_	_
c112649_g7	23.00	3.00	6.256	0.776	-2.86	5.62e-02	1.00e+00	no	down	_	_	_	_	_
c121591_g6	23.00	3.00	3.226	0.473	-2.54	5.62e-02	1.00e+00	no	down	_	_	_	_	_
c110868_g1	7.00	41.00	0.745	3.479	2.08	5.62e-02	1.00e+00	no	up	_	_	_	_	_
c89238_g1	43.00	7.00	1.723	0.279	-2.27	5.62e-02	1.00e+00	no	down	oligosaccharyltransferase complex subunit alpha [Clonorchis sinensis]	RecName: Full=Dolichyl-diphosphooligosaccharide--protein glycosyltransferase subunit 1; AltName: Full=Dolichyl-diphosphooligosaccharide--protein glycosyltransferase	_	OST1, RPN1	PF04597.11|Ribophorin_I|Ribophorin I|m.18680:22-430
c106946_g1	252.00	1155.00	12.622	56.652	2.16	5.71e-02	1.00e+00	no	up	_	_	_	_	_
c112085_g6	129.00	593.00	5.120	23.216	2.16	5.73e-02	1.00e+00	no	up	PREDICTED: GTPase IMAP family member 7-like [Maylandia zebra]	RecName: Full=GTPase IMAP family member 4; AltName: Full=Immunity-associated nucleotide 1 protein; Short=IAN-1; AltName: Full=Immunity-associated protein 4 [Mus mu	_	_	PF04548.13|AIG1|AIG1 family|m.61589:20-232;PF01926.20|MMR_HSR1|50S ribosome-binding GTPase|m.61589:22-143;PF04670.9|Gtr1_RagA|Gtr1/RagA G protein conserved region|m.61589:22-174
c128494_g2	54.00	253.00	2.444	11.202	2.15	5.75e-02	1.00e+00	no	up	_	_	_	_	_
c106268_g1	52.00	9.00	7.710	1.285	-2.50	5.75e-02	1.00e+00	no	down	_	_	_	_	_
c105030_g7	2.00	18.00	1.576	14.984	3.17	5.76e-02	1.00e+00	no	up	_	_	_	_	_
c107595_g1	2.00	18.00	0.110	0.970	2.35	5.76e-02	1.00e+00	no	up	_	_	_	_	_
c85214_g1	2.00	18.00	0.257	2.206	2.69	5.76e-02	1.00e+00	no	up	_	_	_	_	_
c185548_g1	2.00	18.00	0.452	3.843	2.84	5.76e-02	1.00e+00	no	up	_	_	_	_	_
c94854_g1	2.00	18.00	0.196	1.721	2.62	5.76e-02	1.00e+00	no	up	hypothetical protein LOTGIDRAFT_228107 [Lottia gigantea]	_	_	_	_
c114905_g1	18.00	2.00	0.758	0.085	-2.21	5.76e-02	1.00e+00	no	down	_	_	_	_	_
c111689_g1	18.00	2.00	1.100	0.085	-2.70	5.76e-02	1.00e+00	no	down	_	_	_	_	_
c61928_g1	18.00	2.00	2.651	0.279	-2.86	5.76e-02	1.00e+00	no	down	hypothetical protein T265_09429 [Opisthorchis viverrini]	RecName: Full=RNA-binding protein PNO1	Clone ZZD158 mRNA sequence	PNO1, DIM2	_
c82935_g1	18.00	2.00	1.491	0.158	-2.62	5.76e-02	1.00e+00	no	down	GK19787 [Drosophila willistoni]	_	_	_	_
c116384_g1	859.00	3881.00	30.510	136.168	2.15	5.81e-02	1.00e+00	no	up	PREDICTED: zinc finger protein 862-like [Saccoglossus kowalevskii]	_	_	_	_
c124635_g2	825.00	172.00	25.757	5.274	-2.27	5.84e-02	1.00e+00	no	down	hypothetical protein LOTGIDRAFT_131825 [Lottia gigantea]	RecName: Full=Piwi-like protein 1 [Gallus gallus]	_	AUB, PIWI	PF02170.19|PAZ|PAZ domain|m.31863:309-438;PF02171.14|Piwi|Piwi domain|m.31863:584-645
c109256_g1	8.00	45.00	0.513	2.582	2.13	5.85e-02	1.00e+00	no	up	_	_	_	_	_
c127443_g1	243.00	49.00	8.846	1.867	-2.19	5.87e-02	1.00e+00	no	down	_	_	_	_	_
c113293_g1	93.00	18.00	6.647	1.940	-1.73	5.91e-02	1.00e+00	no	down	_	_	_	_	_
c107569_g2	387.00	80.00	32.869	6.571	-2.31	5.92e-02	1.00e+00	no	down	_	_	_	_	_
c124211_g5	10.00	54.00	17.644	82.171	2.21	5.93e-02	1.00e+00	no	up	catalase [Cristaria plicata]	_	_	katE, CAT, catB, srpA	_
c106655_g1	7.00	40.00	0.415	2.291	2.21	5.97e-02	1.00e+00	no	up	_	_	_	_	_
c98876_g1	7.00	40.00	2.187	11.820	2.38	5.97e-02	1.00e+00	no	up	_	_	_	_	_
c66305_g1	7.00	40.00	15.322	74.534	2.27	5.97e-02	1.00e+00	no	up	_	_	_	_	_
c34317_g1	42.00	7.00	1.894	0.315	-2.26	5.97e-02	1.00e+00	no	down	_	_	_	_	_
c84943_g1	88.00	17.00	41.507	7.444	-2.46	5.97e-02	1.00e+00	no	down	hypothetical protein CAPTEDRAFT_223239 [Capitella teleta]	RecName: Full=Teneurin-1; Short=Ten-1; AltName: Full=Protein Odd Oz/ten-m homolog 1; AltName: Full=Tenascin-M1; Short=Ten-m1; AltName: Full=Teneurin transmembrane p	_	_	PF12661.4|hEGF|Human growth factor-like EGF|m.27449:26-37
c122110_g1	9528.00	42497.00	462.811	2052.353	2.15	5.99e-02	1.00e+00	no	up	PREDICTED: complement C1q-like protein 2-like [Oreochromis niloticus]	_	_	_	PF00386.18|C1q|C1q domain|m.11853:43-169
c111451_g1	106.00	21.00	64.210	14.136	-2.18	6.03e-02	1.00e+00	no	down	hypothetical protein PTSG_05000 [Salpingoeca rosetta]	_	_	_	_
c101755_g1	4.00	27.00	0.428	2.800	2.46	6.03e-02	1.00e+00	no	up	_	_	_	_	_
c114828_g1	51.00	9.00	1.087	0.194	-2.01	6.04e-02	1.00e+00	no	down	hypothetical protein LOTGIDRAFT_155365 [Lottia gigantea]	RecName: Full=Cytochrome P450 2F2; AltName: Full=CYPIIF2; AltName: Full=Cytochrome P450-NAH-2; AltName: Full=Naphthalene dehydrogenase; AltName: Full=Naphthalene hydr	_	CYP18A1	PF00067.19|p450|Cytochrome P450|m.16525:36-492
c126025_g2	51.00	9.00	8.125	1.382	-2.47	6.04e-02	1.00e+00	no	down	_	_	_	_	_
c124334_g2	51.00	9.00	2.480	0.509	-2.08	6.04e-02	1.00e+00	no	down	_	_	_	_	_
c119018_g5	83.00	16.00	4.167	0.788	-2.26	6.05e-02	1.00e+00	no	down	_	_	_	_	_
c127914_g1	437.00	92.00	9.922	2.049	-2.22	6.14e-02	1.00e+00	no	down	PREDICTED: low-density lipoprotein receptor-related protein 4-like [Saccoglossus kowalevskii]	RecName: Full=Low-density lipoprotein receptor-related protein 5; Short=LRP-5; AltName: Full=Low-density lipoprotein receptor-related protein 7; Short=LRP-7; AltNa	_	LRP5_6	PF00058.14|Ldl_recept_b|Low-density lipoprotein receptor repeat class B|m.11124:93-131;PF00058.14|Ldl_recept_b|Low-density lipoprotein receptor repeat class B|m.11124:139-175
c116325_g1	298.00	62.00	19.672	4.158	-2.22	6.19e-02	1.00e+00	no	down	_	_	_	_	_
c95594_g1	109.00	490.00	6.781	29.617	2.11	6.21e-02	1.00e+00	no	up	PREDICTED: basic phospholipase A2 73-like [Aplysia californica]	RecName: Full=Acidic phospholipase A2 homolog textilotoxin C chain; Short=svPLA2 homolog; Flags: Precursor	_	PLA2G, SPLA2	PF00068.16|Phospholip_A2_1|Phospholipase A2|m.34705:82-190
c105689_g1	260.00	1149.00	10.826	46.905	2.11	6.22e-02	1.00e+00	no	up	hypothetical protein LOTGIDRAFT_126803, partial [Lottia gigantea]	RecName: Full=Carbonic anhydrase 1; AltName: Full=Carbonate dehydratase I; AltName: Full=Carbonic anhydrase I; Short=CA-I [Ovis aries]	_	CA2	PF00194.18|Carb_anhydrase|Eukaryotic-type carbonic anhydrase|m.72806:18-279
c120078_g1	64.00	12.00	2.297	0.424	-2.19	6.22e-02	1.00e+00	no	down	_	_	_	_	_
c160272_g1	146.00	30.00	46.456	9.020	-2.35	6.26e-02	1.00e+00	no	down	large subunit ribosomal protein L35Ae [Clonorchis sinensis]	_	Putative uncharacterized protein	RP-L35Ae, RPL35A	PF01247.15|Ribosomal_L35Ae|Ribosomal protein L35Ae|m.65651:31-131
c128804_g2	3.00	22.00	0.391	2.946	2.63	6.27e-02	1.00e+00	no	up	_	_	_	_	_
c117692_g1	22.00	3.00	0.916	0.121	-2.20	6.27e-02	1.00e+00	no	down	_	_	_	_	_
c105261_g1	22.00	3.00	1.112	0.145	-2.31	6.27e-02	1.00e+00	no	down	_	_	_	_	_
c116195_g2	15.00	75.00	1.026	4.134	1.91	6.34e-02	1.00e+00	no	up	_	_	_	_	PF00386.18|C1q|C1q domain|m.32479:139-232
c130445_g1	41.00	7.00	1.210	0.206	-2.10	6.35e-02	1.00e+00	no	down	PREDICTED: hypothetical protein LOC100632094, partial [Amphimedon queenslandica]	_	_	_	PF02023.14|SCAN|SCAN domain|m.60899:187-275;PF00098.20|zf-CCHC|Zinc knuckle|m.60899:344-359;PF13650.3|Asp_protease_2|Aspartyl protease|m.60899:375-445
c124904_g2	34.00	159.00	7.185	32.187	2.15	6.36e-02	1.00e+00	no	up	PREDICTED: cytochrome P450 2J2-like [Aplysia californica]	_	_	_	_
c56349_g1	603.00	129.00	43.389	9.056	-2.25	6.37e-02	1.00e+00	no	down	hypothetical protein LOTGIDRAFT_171004 [Lottia gigantea]	_	_	_	PF01607.21|CBM_14|Chitin binding Peritrophin-A domain|m.67523:32-78;PF01607.21|CBM_14|Chitin binding Peritrophin-A domain|m.67523:89-138
c108704_g1	81.00	16.00	10.447	2.388	-2.08	6.44e-02	1.00e+00	no	down	_	_	_	_	_
c118020_g1	36.00	167.00	5.767	25.810	2.14	6.46e-02	1.00e+00	no	up	_	_	_	_	_
c54198_g1	72.00	14.00	16.007	2.970	-2.39	6.46e-02	1.00e+00	no	down	hypothetical protein T265_01451 [Opisthorchis viverrini]	RecName: Full=40S ribosomal protein S18	SJCHGC01887 protein	RP-S18e, RPS18	PF00416.19|Ribosomal_S13|Ribosomal protein S13/S18|m.4617:20-148
c116241_g10	72.00	14.00	2.798	0.921	-1.51	6.46e-02	1.00e+00	no	down	_	_	_	_	_
c118243_g1	55.00	245.00	0.562	2.449	1.95	6.53e-02	1.00e+00	no	up	_	_	_	_	PF00791.17|ZU5|ZU5 domain|m.44436:667-760
c94115_g1	8417.00	1849.00	901.124	192.274	-2.23	6.54e-02	1.00e+00	no	down	flagellar calmodulin [Naegleria CALMF_NAEGR RecName: Full=Calmodulin, flagellar; AltName: Full=CAM-1 [Naegleria	_	_	CALM	PF00036.29|EF-hand_1|EF hand|m.69058:13-36;PF00036.29|EF-hand_1|EF hand|m.69058:82-109;PF13499.3|EF-hand_7|EF-hand domain pair|m.69058:13-70;PF13499.3|EF-hand_7|EF-hand domain pair|m.69058:83-142;PF13405.3|EF-hand_6|EF-hand domain|m.69058:13-36;PF13405.3|EF-hand_6|EF-hand domain|m.69058:83-109;PF13202.3|EF-hand_5|EF hand|m.69058:13-35;PF13202.3|EF-hand_5|EF hand|m.69058:83-106;PF13202.3|EF-hand_5…
c109633_g1	35.00	6.00	5.523	0.909	-2.48	6.58e-02	1.00e+00	no	down	_	_	_	_	_
c78339_g1	4.00	26.00	7.429	41.243	2.46	6.62e-02	1.00e+00	no	up	_	_	_	_	_
c103124_g2	26.00	4.00	1.393	0.206	-2.29	6.62e-02	1.00e+00	no	down	_	_	_	_	_
c121979_g2	11.00	56.00	0.501	2.473	2.10	6.64e-02	1.00e+00	no	up	PREDICTED: proton-coupled folate transporter-like [Oryzias latipes]	_	_	SLC46A1_3	_
c118122_g1	69.00	304.00	3.934	17.215	2.10	6.64e-02	1.00e+00	no	up	_	_	_	_	_
c128415_g1	703.00	3022.00	14.296	61.925	2.11	6.64e-02	1.00e+00	no	up	hypothetical protein LOTGIDRAFT_159050 [Lottia gigantea]	RecName: Full=Protein toll; Flags: Precursor [Drosophila melanogaster]	_	TL	PF01582.17|TIR|TIR domain|m.29358:482-590;PF13676.3|TIR_2|TIR domain|m.29358:485-588
c84303_g1	80.00	16.00	2.969	0.582	-2.17	6.65e-02	1.00e+00	no	down	protein disulphide isomerase [Fasciola hepatica]	RecName: Full=Protein disulfide-isomerase; Short=PDI; AltName: Full=Cellular thyroid hormone-binding protein; AltName: Full=Prolyl 4-hydroxylase subunit beta; AltNam	_	PDIA1, P4HB	PF00085.17|Thioredoxin|Thioredoxin|m.59031:45-147;PF00085.17|Thioredoxin|Thioredoxin|m.59031:384-486;PF13848.3|Thioredoxin_6|Thioredoxin-like domain|m.59031:195-360;PF00578.18|AhpC-TSA|AhpC/TSA family|m.59031:59-119
c126081_g4	26.00	121.00	1.087	4.958	2.09	6.65e-02	1.00e+00	no	up	_	_	_	_	_
c121721_g2	49.00	9.00	4.252	0.764	-2.33	6.69e-02	1.00e+00	no	down	unnamed protein product, partial [Oncorhynchus mykiss]	RecName: Full=Protocadherin-7; AltName: Full=Brain-heart protocadherin; Short=BH-Pcdh; Flags: Precursor [Homo sapiens]	_	_	PF00028.14|Cadherin|Cadherin domain|m.13311:39-120
c121748_g1	551.00	120.00	22.153	4.728	-2.20	6.69e-02	1.00e+00	no	down	Caprin-2 [Crassostrea gigas]	_	_	_	PF00386.18|C1q|C1q domain|m.21120:58-180
c123504_g6	177.00	37.00	6.427	1.321	-2.20	6.73e-02	1.00e+00	no	down	_	_	_	_	_
c37381_g1	124.00	26.00	9.971	2.025	-2.24	6.79e-02	1.00e+00	no	down	_	_	_	_	_
c98515_g1	180.00	38.00	22.018	4.461	-2.28	6.86e-02	1.00e+00	no	down	protein lethal, putative [Pediculus humanus corporis]	RecName: Full=Heat shock protein beta-1; Short=HspB1; AltName: Full=25 kDa IAP; AltName: Full=Actin polymerization inhibitor; AltName: Full=Heat shock 25 kDa protein	similar to heat shock protein 1	CRYAB	PF00011.18|HSP20|Hsp20/alpha crystallin family|m.2365:70-166
c108718_g1	5.00	30.00	0.318	1.843	2.22	6.87e-02	1.00e+00	no	up	_	_	_	_	_
c99658_g1	8.00	42.00	0.660	3.795	2.36	6.92e-02	1.00e+00	no	up	_	_	_	_	_
c120897_g1	44.00	8.00	9.042	1.576	-2.45	6.92e-02	1.00e+00	no	down	_	_	_	_	_
c116580_g5	17.00	81.00	2.419	13.687	2.45	6.94e-02	1.00e+00	no	up	_	_	_	_	PF07686.14|V-set|Immunoglobulin V-set domain|m.38537:50-152;PF07679.13|I-set|Immunoglobulin I-set domain|m.38537:94-152
c107733_g1	7419.00	1669.00	350.496	77.237	-2.18	6.95e-02	1.00e+00	no	down	_	_	_	_	_
c86128_g1	328.00	72.00	70.502	14.802	-2.24	6.96e-02	1.00e+00	no	down	PREDICTED: repetitive proline-rich cell wall protein 1-like, partial [Galeopterus variegatus]	_	_	_	_
c126191_g3	639.00	142.00	28.739	7.989	-1.83	6.98e-02	1.00e+00	no	down	PREDICTED: balbiani ring protein 3-like [Aplysia californica]	_	_	_	PF03128.11|CXCXC|CXCXC repeat|m.61853:3-15
c125083_g2	341.00	1436.00	3.629	15.069	2.02	7.01e-02	1.00e+00	no	up	hypothetical protein LOTGIDRAFT_192974, partial [Lottia gigantea]	RecName: Full=Prestin; AltName: Full=Solute carrier family 26 member 5 [Mus musculus]	_	SLC26A6	PF00916.17|Sulfate_transp|Sulfate permease family|m.24119:79-528;PF01740.18|STAS|STAS domain|m.24119:581-752
c104988_g1	3.00	21.00	2.089	0.861	-1.19	7.01e-02	1.00e+00	no	down	_	_	_	_	_
c98577_g1	21.00	3.00	1.808	0.255	-2.43	7.01e-02	1.00e+00	no	down	hypothetical protein LOTGIDRAFT_153818 [Lottia gigantea]	_	_	HES1	PF00010.23|HLH|Helix-loop-helix DNA-binding domain|m.65965:21-76;PF07527.10|Hairy_orange|Hairy Orange|m.65965:94-126
c118965_g1	21.00	3.00	1.931	0.267	-2.47	7.01e-02	1.00e+00	no	down	toll-like receptor g precursor [Mytilus galloprovincialis]	_	_	_	PF01582.17|TIR|TIR domain|m.43374:211-280;PF13676.3|TIR_2|TIR domain|m.43374:212-280;PF13855.3|LRR_8|Leucine rich repeat|m.43374:4-47
c112661_g1	131.00	28.00	9.567	2.000	-2.20	7.02e-02	1.00e+00	no	down	_	_	_	_	_
c114951_g2	9.00	46.00	0.391	1.952	2.06	7.05e-02	1.00e+00	no	up	_	_	_	_	_
c115252_g1	6.00	34.00	0.831	4.546	2.32	7.06e-02	1.00e+00	no	up	_	_	_	_	_
c101548_g1	34.00	6.00	2.419	0.412	-2.30	7.06e-02	1.00e+00	no	down	hypothetical protein T265_07075 [Opisthorchis viverrini]	_	_	_	PF00335.17|Tetraspannin|Tetraspanin family|m.77170:8-288
c53242_g1	34.00	6.00	31.170	4.934	-2.64	7.06e-02	1.00e+00	no	down	small subunit ribosomal protein S27e [Schistosoma japonicum]	_	SJCHGC02603 protein	RP-S27e, RPS27	_
c111608_g1	16.00	76.00	1.197	5.565	2.13	7.09e-02	1.00e+00	no	up	PREDICTED: phosphoenolpyruvate carboxykinase [GTP]	RecName: Full=Phosphoenolpyruvate carboxykinase, cytosolic [GTP]	_	E4.1.1.32, pckA, PEPCK	PF00821.15|PEPCK|Phosphoenolpyruvate carboxykinase|m.43211:1-95
c127296_g5	347.00	77.00	83.613	38.649	-1.11	7.14e-02	1.00e+00	no	down	_	_	_	_	_
c100339_g1	10.00	50.00	5.046	20.355	1.99	7.16e-02	1.00e+00	no	up	_	_	_	_	_
c126086_g3	10.00	50.00	2.175	5.504	1.30	7.16e-02	1.00e+00	no	up	_	_	_	_	_
c118567_g3	52.00	10.00	1.992	0.376	-2.14	7.16e-02	1.00e+00	no	down	_	_	_	_	_
c118670_g1	39.00	7.00	0.611	0.109	-1.77	7.21e-02	1.00e+00	no	down	hypothetical protein CGI_10027189 [Crassostrea gigas]	_	_	_	PF00092.25|VWA|von Willebrand factor type A domain|m.51075:39-204
c115580_g1	39.00	7.00	3.898	0.630	-2.45	7.21e-02	1.00e+00	no	down	_	_	_	_	_
c107651_g2	121.00	26.00	12.365	2.582	-2.22	7.23e-02	1.00e+00	no	down	_	_	_	_	_
c73708_g1	73.00	15.00	4.203	0.849	-2.18	7.26e-02	1.00e+00	no	down	_	_	_	_	_
c106242_g1	4.00	25.00	0.330	1.588	1.97	7.28e-02	1.00e+00	no	up	_	_	_	_	PF00335.17|Tetraspannin|Tetraspanin family|m.49083:29-273
c110973_g1	25.00	4.00	2.603	0.400	-2.43	7.28e-02	1.00e+00	no	down	_	_	_	_	_
c97241_g1	25.00	4.00	1.723	0.279	-2.27	7.28e-02	1.00e+00	no	down	_	_	_	_	_
c128077_g2	12.00	58.00	1.051	4.946	2.13	7.33e-02	1.00e+00	no	up	_	_	_	_	_
c129641_g1	25.00	112.00	0.758	3.358	2.01	7.35e-02	1.00e+00	no	up	_	_	_	_	_
c117623_g5	47.00	9.00	6.158	1.018	-2.48	7.43e-02	1.00e+00	no	down	_	_	_	_	_
c127296_g3	495.00	112.00	34.652	7.662	-2.16	7.44e-02	1.00e+00	no	down	unnamed protein product [Oncorhynchus mykiss]	_	_	_	_
c103372_g1	29.00	5.00	3.104	0.497	-2.42	7.46e-02	1.00e+00	no	down	_	_	_	_	_
c130082_g4	29.00	5.00	6.085	1.006	-2.48	7.46e-02	1.00e+00	no	down	PREDICTED: uncharacterized protein LOC101846070 isoform X1 [Aplysia californica]	_	_	_	_
c116207_g1	68.00	14.00	3.495	0.703	-2.16	7.47e-02	1.00e+00	no	down	_	_	_	_	_
c125986_g2	1319.00	304.00	69.061	18.791	-1.87	7.49e-02	1.00e+00	no	down	PREDICTED: putative ferric-chelate reductase 1 isoform X1 [Callorhinchus milii]	_	_	_	PF02014.13|Reeler|Reeler domain|m.5846:34-158
c9610_g1	51.00	10.00	4.606	0.873	-2.27	7.52e-02	1.00e+00	no	down	_	_	_	_	_
c124258_g1	72.00	15.00	2.248	0.461	-2.07	7.52e-02	1.00e+00	no	down	_	_	_	_	_
c122373_g1	97.00	21.00	2.334	0.497	-2.03	7.56e-02	1.00e+00	no	down	TPA_exp: pol polyprotein [Schistosoma mansoni]	_	_	_	PF00665.23|rve|Integrase core domain|m.2732:121-229
c116898_g1	6.00	33.00	0.880	4.667	2.28	7.59e-02	1.00e+00	no	up	_	_	_	_	_
c115016_g4	59.00	12.00	4.985	1.237	-1.93	7.65e-02	1.00e+00	no	down	_	_	_	_	_
c125392_g4	7.00	37.00	0.721	3.734	2.22	7.70e-02	1.00e+00	no	up	_	_	_	_	_
c128673_g3	7.00	37.00	2.761	13.687	2.27	7.70e-02	1.00e+00	no	up	_	_	_	_	_
c118142_g1	51.00	212.00	3.898	13.275	1.74	7.76e-02	1.00e+00	no	up	hypothetical protein BRAFLDRAFT_223573 [Branchiostoma floridae]	RecName: Full=Collectin-10; Flags: Precursor [Xenopus (Silurana) tropicalis]	_	MRC	PF00059.18|Lectin_C|Lectin C-type domain|m.25327:47-154
c122894_g1	8.00	40.00	0.391	1.515	1.72	7.78e-02	1.00e+00	no	up	_	_	_	_	_
c116050_g3	15.00	69.00	0.293	1.309	1.84	7.79e-02	1.00e+00	no	up	hypothetical protein BRAFLDRAFT_84849 [Branchiostoma floridae]	RecName: Full=Uncharacterized protein TM_0508 [Thermotoga maritima MSB8]	_	PARP10_14_15	PF01661.18|Macro|Macro domain|m.44235:500-617;PF01661.18|Macro|Macro domain|m.44235:742-858
c127643_g1	832.00	194.00	11.754	4.134	-1.49	7.82e-02	1.00e+00	no	down	hypothetical protein LOTGIDRAFT_238308 [Lottia gigantea]	RecName: Full=Vascular endothelial growth factor receptor kdr-like; AltName: Full=Fetal liver kinase 1; Short=FLK-1; AltName: Full=Kinase insert domain receptor-A;	_	MATK	PF07714.14|Pkinase_Tyr|Protein tyrosine kinase|m.72066:988-1249;PF00069.22|Pkinase|Protein kinase domain|m.72066:992-1247
c124049_g3	17.00	77.00	0.904	1.382	0.56	7.86e-02	1.00e+00	no	up	hypothetical protein T265_09208 [Opisthorchis viverrini]	_	_	_	PF00057.15|Ldl_recept_a|Low-density lipoprotein receptor domain class A|m.33820:41-75
c111751_g1	3.00	20.00	0.452	2.934	2.46	7.87e-02	1.00e+00	no	up	_	_	_	_	_
c109623_g1	20.00	3.00	3.226	0.473	-2.54	7.87e-02	1.00e+00	no	down	_	_	_	_	_
c106441_g1	20.00	3.00	1.527	0.230	-2.30	7.87e-02	1.00e+00	no	down	Multiple epidermal growth factor-like domains 10 [Crassostrea gigas]	_	_	_	_
c37485_g1	20.00	3.00	2.138	0.315	-2.43	7.87e-02	1.00e+00	no	down	hypothetical protein T265_10137 [Opisthorchis viverrini]	_	Ubiquitin carrier protein (EC 6.3.2.-)	UBE2L3, UBCH7	PF00179.23|UQ_con|Ubiquitin-conjugating enzyme|m.37441:6-144
c111633_g1	20.00	3.00	1.979	0.291	-2.41	7.87e-02	1.00e+00	no	down	_	_	_	_	_
c37520_g1	20.00	3.00	4.191	0.606	-2.60	7.87e-02	1.00e+00	no	down	hypothetical protein T265_07175 [Opisthorchis viverrini]	_	Putative uncharacterized protein	ATPeF0D, ATP5H, ATP7	PF05873.9|Mt_ATP-synt_D|ATP synthase D chain, mitochondrial (ATP5H)|m.19001:4-150
c127987_g2	10.00	48.00	0.318	1.503	1.94	7.90e-02	1.00e+00	no	up	Low-density lipoprotein receptor-related protein 6 [Crassostrea gigas]	RecName: Full=Blastula protease 10; Flags: Precursor [Paracentrotus lividus]	_	LRP5_6	PF00431.17|CUB|CUB domain|m.63393:48-158;PF00058.14|Ldl_recept_b|Low-density lipoprotein receptor repeat class B|m.63393:255-294;PF00058.14|Ldl_recept_b|Low-density lipoprotein receptor repeat class B|m.63393:300-338;PF14670.3|FXa_inhibition|Coagulation Factor Xa inhibitory site|m.63393:441-477
c93117_g1	10.00	48.00	1.564	7.250	2.14	7.90e-02	1.00e+00	no	up	_	_	_	_	_
c126222_g1	11.00	52.00	1.100	5.031	2.10	7.94e-02	1.00e+00	no	up	_	_	_	_	_
c107898_g1	216.00	49.00	31.121	6.692	-2.20	7.95e-02	1.00e+00	no	down	_	_	_	_	_
c126081_g2	197.00	792.00	5.951	23.859	1.99	7.95e-02	1.00e+00	no	up	_	_	_	_	_
c107464_g1	274.00	63.00	29.398	6.559	-2.15	7.98e-02	1.00e+00	no	down	_	_	_	_	_
c129960_g1	4.00	24.00	0.562	3.261	2.34	8.02e-02	1.00e+00	no	up	predicted protein [Nematostella predicted protein [Nematostella vectensis]	_	_	_	_
c111694_g2	4.00	24.00	0.379	2.219	2.28	8.02e-02	1.00e+00	no	up	PREDICTED: SAM domain and HD domain-containing protein 1-like, partial [Takifugu rubripes]	RecName: Full=Deoxynucleoside triphosphate triphosphohydrolase SAMHD1; Short=dNTPase	SAM domain and HD domain 1	_	PF01966.19|HD|HD domain|m.20418:117-196
c112946_g1	4.00	24.00	0.134	0.764	1.88	8.02e-02	1.00e+00	no	up	_	_	_	_	_
c122453_g3	4.00	24.00	0.330	1.928	2.24	8.02e-02	1.00e+00	no	up	_	_	_	_	_
c120885_g3	4.00	24.00	0.464	2.582	2.25	8.02e-02	1.00e+00	no	up	PREDICTED: cytochrome P450 2J6-like [Xenopus (Silurana) tropicalis]	_	_	CYP2H	PF00067.19|p450|Cytochrome P450|m.7795:35-108
c101496_g1	4.00	24.00	0.257	1.515	2.18	8.02e-02	1.00e+00	no	up	_	_	_	_	_
c118666_g1	4.00	24.00	0.305	2.097	2.44	8.02e-02	1.00e+00	no	up	_	_	_	_	_
c17228_g1	24.00	4.00	1.540	0.255	-2.21	8.02e-02	1.00e+00	no	down	hypothetical protein T265_10359 [Opisthorchis viverrini]	RecName: Full=Adenosine kinase 2; Short=AK 2; AltName: Full=Adenosine 5'-phosphotransferase 2 [Arabidopsis thaliana]	_	E2.7.1.20, ADK	PF00294.21|PfkB|pfkB family carbohydrate kinase|m.75266:41-349
c119569_g2	14.00	64.00	0.758	3.407	2.03	8.04e-02	1.00e+00	no	up	_	_	_	_	_
c153162_g1	190.00	43.00	28.922	6.316	-2.18	8.09e-02	1.00e+00	no	down	myoglobin 1 [Paragonimus westermani]	RecName: Full=Globin; AltName: Full=Myoglobin	_	_	PF00042.19|Globin|Globin|m.6499:34-119
c112943_g3	259.00	60.00	33.846	7.626	-2.14	8.11e-02	1.00e+00	no	down	_	_	_	_	_
c128310_g1	5.00	28.00	2.957	15.190	2.32	8.12e-02	1.00e+00	no	up	_	_	_	_	_
c129889_g2	5.00	28.00	6.268	30.926	2.28	8.12e-02	1.00e+00	no	up	PREDICTED: protocadherin Fat 4 isoform X1 [Ictidomys tridecemlineatus]	RecName: Full=Protocadherin Fat 4; AltName: Full=FAT tumor suppressor homolog 4; AltName: Full=Fat-like cadherin protein FAT-J; Flags: Precursor [Mus musculus]	_	FAT4	PF00028.14|Cadherin|Cadherin domain|m.20791:5-63
c106840_g1	28.00	5.00	1.246	0.255	-1.92	8.12e-02	1.00e+00	no	down	_	_	_	_	_
c176783_g1	28.00	5.00	1.955	0.339	-2.23	8.12e-02	1.00e+00	no	down	hypothetical protein T265_07370 [Opisthorchis viverrini]	RecName: Full=Transformer-2 protein homolog beta; Short=TRA-2 beta; Short=TRA2-beta; AltName: Full=RA301; AltName: Full=Splicing factor, arginine/serine-rich 10; Alt	_	TRA2	PF00076.19|RRM_1|RNA recognition motif. (a.k.a. RRM, RBD, or RNP domain)|m.34999:112-180
c123761_g1	28.00	5.00	1.442	0.255	-2.12	8.12e-02	1.00e+00	no	down	_	_	_	_	_
c122490_g1	20.00	88.00	1.234	5.201	1.99	8.16e-02	1.00e+00	no	up	_	_	_	_	_
c121203_g1	94.00	21.00	7.979	1.625	-2.23	8.17e-02	1.00e+00	no	down	_	_	_	_	_
c119941_g2	320.00	75.00	13.783	3.201	-2.07	8.17e-02	1.00e+00	no	down	techylectin-5B [Culex techylectin-5B [Culex quinquefasciatus]	RecName: Full=Tenascin-N; Short=TN-N; Flags: Precursor [Homo sapiens]	_	_	PF00147.15|Fibrinogen_C|Fibrinogen beta and gamma chains, C-terminal globular domain|m.34526:379-421
c122056_g2	32.00	6.00	3.409	0.570	-2.39	8.18e-02	1.00e+00	no	down	_	_	_	_	_
c97419_g2	32.00	6.00	1.430	0.267	-2.06	8.18e-02	1.00e+00	no	down	_	_	_	_	_
c105431_g1	32.00	6.00	397.062	58.422	-2.76	8.18e-02	1.00e+00	no	down	_	_	_	_	_
c122333_g1	193.00	44.00	4.851	1.030	-2.13	8.21e-02	1.00e+00	no	down	_	_	_	_	_
c107827_g1	7.00	36.00	0.623	3.140	2.16	8.22e-02	1.00e+00	no	up	_	_	_	_	_
c98849_g1	36.00	7.00	3.568	0.667	-2.26	8.22e-02	1.00e+00	no	down	_	_	_	_	_
c129215_g1	516.00	122.00	8.675	2.012	-2.05	8.24e-02	1.00e+00	no	down	hypothetical protein LOTGIDRAFT_154256 [Lottia gigantea]	_	_	_	_
c119647_g2	131.00	30.00	10.300	1.515	-2.69	8.25e-02	1.00e+00	no	down	_	_	_	_	_
c111469_g1	8.00	39.00	0.452	2.146	2.02	8.26e-02	1.00e+00	no	up	_	_	_	_	_
c119953_g1	45.00	9.00	1.381	0.279	-1.97	8.28e-02	1.00e+00	no	down	_	_	_	_	_
c127649_g1	49.00	10.00	3.788	0.752	-2.19	8.30e-02	1.00e+00	no	down	_	_	_	_	_
c109185_g5	53.00	11.00	6.781	1.297	-2.30	8.32e-02	1.00e+00	no	down	_	_	_	_	_
c129347_g2	811.00	194.00	49.462	11.566	-2.09	8.34e-02	1.00e+00	no	down	_	_	_	_	_
c117399_g1	61.00	13.00	4.460	0.921	-2.16	8.34e-02	1.00e+00	no	down	_	_	_	_	_
c125763_g1	97.00	22.00	4.753	1.055	-2.07	8.39e-02	1.00e+00	no	down	_	_	_	_	_
c126622_g1	101.00	23.00	23.106	10.911	-1.08	8.40e-02	1.00e+00	no	down	_	_	_	_	_
c122799_g4	24.00	103.00	2.639	10.984	2.02	8.40e-02	1.00e+00	no	up	_	_	_	_	_
c107776_g3	25.00	107.00	6.610	27.508	2.04	8.40e-02	1.00e+00	no	up	_	_	_	_	_
c121852_g1	37.00	150.00	1.283	5.128	1.92	8.42e-02	1.00e+00	no	up	Zinc transporter ZIP14 [Crassostrea gigas]	RecName: Full=Zinc transporter ZIP10; AltName: Full=Solute carrier family 39 member 10; AltName: Full=Zrt- and Irt-like protein 10; Short=ZIP-10; Flags: Precursor	hypothetical protein	SLC39A14, ZIP14	PF02535.19|Zip|ZIP Zinc transporter|m.32972:173-477
c105351_g1	73.00	292.00	6.439	25.095	1.95	8.43e-02	1.00e+00	no	up	_	_	_	_	_
c115453_g2	341.00	81.00	15.408	3.588	-2.07	8.44e-02	1.00e+00	no	down	_	_	_	_	_
c110988_g1	367.00	1429.00	11.852	45.292	1.93	8.56e-02	1.00e+00	no	up	PREDICTED: uncharacterized protein LOC101845778 [Aplysia californica]	_	_	_	_
c123848_g2	31.00	129.00	1.564	6.619	2.01	8.57e-02	1.00e+00	no	up	PREDICTED: GTPase IMAP family member 4-like, partial [Neolamprologus brichardi]	_	_	_	PF04548.13|AIG1|AIG1 family|m.69043:240-415;PF01926.20|MMR_HSR1|50S ribosome-binding GTPase|m.69043:242-362
c129362_g1	186.00	725.00	10.569	32.684	1.62	8.58e-02	1.00e+00	no	up	_	_	_	_	_
c123234_g1	112.00	26.00	10.643	2.400	-2.10	8.59e-02	1.00e+00	no	down	_	_	_	_	_
c125441_g1	98.00	388.00	3.140	13.530	2.07	8.60e-02	1.00e+00	no	up	hypothetical protein CAPTEDRAFT_211318, partial [Capitella teleta]	_	_	_	PF09612.7|HtrL_YibB|Bacterial protein of unknown function (HtrL_YibB)|m.46819:108-341
c107219_g1	229.00	54.00	8.688	2.012	-2.06	8.61e-02	1.00e+00	no	down	Pulmonary surfactant-associated protein D [Myotis davidii]	RecName: Full=C-type lectin domain family 6 member A; AltName: Full=C-type lectin superfamily member 10; AltName: Full=Dendritic cell-associated C-type lectin 2; S	_	SFTPD, SFTP4	PF00059.18|Lectin_C|Lectin C-type domain|m.32747:60-163
c111235_g1	20.00	86.00	1.430	4.607	1.62	8.62e-02	1.00e+00	no	up	_	_	_	_	_
c112420_g1	76.00	17.00	2.517	1.358	-0.84	8.65e-02	1.00e+00	no	down	_	_	_	_	_
c118850_g1	184.00	43.00	4.484	1.030	-2.02	8.65e-02	1.00e+00	no	down	PREDICTED: uncharacterized protein LOC101856893 [Aplysia californica]	_	_	_	_
c113951_g1	68.00	15.00	8.407	1.794	-2.17	8.67e-02	1.00e+00	no	down	_	_	_	_	_
c113792_g1	64.00	14.00	4.961	1.055	-2.13	8.68e-02	1.00e+00	no	down	PREDICTED: collagen alpha-5(VI) chain-like [Aplysia californica]	_	_	_	PF00092.25|VWA|von Willebrand factor type A domain|m.33425:33-193;PF13519.3|VWA_2|von Willebrand factor type A domain|m.33425:34-138
c116719_g1	210.00	815.00	10.154	42.601	2.06	8.70e-02	1.00e+00	no	up	PREDICTED: hypothetical protein LOC100635358 [Amphimedon queenslandica]	RecName: Full=Ficolin-1; AltName: Full=Ficolin-A; AltName: Full=Ficolin-alpha; Flags: Precursor [Sus scrofa]	_	_	PF00147.15|Fibrinogen_C|Fibrinogen beta and gamma chains, C-terminal globular domain|m.34108:289-456
c100826_g1	12.00	54.00	1.100	5.443	2.21	8.71e-02	1.00e+00	no	up	_	_	_	_	PF07686.14|V-set|Immunoglobulin V-set domain|m.36376:43-132
c105271_g1	1502.00	5778.00	398.797	1443.912	1.86	8.72e-02	1.00e+00	no	up	_	_	_	_	_
c101162_g1	27611.00	6807.00	1732.991	417.609	-2.05	8.73e-02	1.00e+00	no	down	_	_	_	_	_
c86679_g1	29.00	120.00	53.127	189.171	1.83	8.75e-02	1.00e+00	no	up	_	_	_	_	_
c70492_g1	116.00	27.00	2.456	0.558	-1.96	8.77e-02	1.00e+00	no	down	hypothetical protein T265_07827 [Opisthorchis viverrini]	RecName: Full=Cell division cycle and apoptosis regulator protein 1	SJCHGC09302 protein	_	PF14443.3|DBC1|DBC1|m.62091:227-354;PF02037.24|SAP|SAP domain|m.62091:405-438
c94240_g1	40.00	8.00	1.906	0.376	-2.08	8.78e-02	1.00e+00	no	down	collagen type I/II/III/V/XI alpha [Clonorchis sinensis]	_	SJCHGC09249 protein	COL1A	PF01391.15|Collagen|Collagen triple helix repeat (20 copies)|m.38680:4-60;PF01391.15|Collagen|Collagen triple helix repeat (20 copies)|m.38680:399-451
c121638_g1	40.00	8.00	4.044	0.788	-2.22	8.78e-02	1.00e+00	no	down	_	_	_	_	_
c92684_g1	2802.00	10744.00	303.759	1131.121	1.90	8.78e-02	1.00e+00	no	up	hypothetical protein ATCVNEJV3_003L [Acanthocystis turfacea Chlorella virus NE-JV-3]	_	_	_	_
c123152_g1	7.00	35.00	0.929	4.498	2.16	8.80e-02	1.00e+00	no	up	_	_	_	_	_
c80745_g1	35.00	7.00	43.242	7.626	-2.49	8.80e-02	1.00e+00	no	down	PREDICTED: basement membrane-specific heparan sulfate proteoglycan core protein-like [Aplysia californica]	RecName: Full=Low-density lipoprotein receptor-related protein 1B; Short=LRP-1B; AltName: Full=Low-density lipoprotein receptor-related protein-deleted in tumor; S	_	_	PF00057.15|Ldl_recept_a|Low-density lipoprotein receptor domain class A|m.62145:13-45;PF00057.15|Ldl_recept_a|Low-density lipoprotein receptor domain class A|m.62145:49-84
c129853_g3	35.00	7.00	3.067	0.594	-2.19	8.80e-02	1.00e+00	no	down	_	_	_	_	_
c108565_g2	6.00	31.00	0.220	1.115	1.92	8.82e-02	1.00e+00	no	up	_	_	_	_	_
c111866_g1	6.00	31.00	0.403	2.049	2.10	8.82e-02	1.00e+00	no	up	PREDICTED: receptor-type tyrosine-protein phosphatase kappa-like [Aplysia californica]	_	_	PTPRA	PF00102.24|Y_phosphatase|Protein-tyrosine phosphatase|m.33565:2-151
c112906_g1	31.00	6.00	3.348	0.630	-2.24	8.82e-02	1.00e+00	no	down	_	_	_	_	_
c110128_g2	31.00	6.00	2.651	0.497	-2.20	8.82e-02	1.00e+00	no	down	_	_	_	_	_
c106076_g1	5.00	27.00	0.379	2.000	2.13	8.85e-02	1.00e+00	no	up	_	_	_	_	_
c85763_g1	27.00	5.00	1.356	0.242	-2.09	8.85e-02	1.00e+00	no	down	_	_	_	_	_
c100216_g1	27.00	5.00	20.112	3.382	-2.54	8.85e-02	1.00e+00	no	down	_	_	_	_	_
c164481_g1	27.00	5.00	15.347	2.619	-2.51	8.85e-02	1.00e+00	no	down	SJCHGC02367 protein [Schistosoma japonicum]	_	_	_	_
c115796_g1	27.00	5.00	0.868	0.158	-1.91	8.85e-02	1.00e+00	no	down	hypothetical protein LOTGIDRAFT_62404, partial [Lottia gigantea]	RecName: Full=Glucagon receptor; Short=GL-R; Flags: Precursor [Rattus norvegicus]	_	PTHR1	PF00002.21|7tm_2|7 transmembrane receptor (Secretin family)|m.62950:145-405;PF02793.19|HRM|Hormone receptor domain|m.62950:63-127
c108294_g1	4.00	23.00	0.330	1.818	2.16	8.87e-02	1.00e+00	no	up	_	_	_	_	_
c126689_g2	4.00	23.00	0.440	2.449	2.24	8.87e-02	1.00e+00	no	up	_	_	_	_	_
c94567_g1	23.00	4.00	1.735	0.182	-2.70	8.87e-02	1.00e+00	no	down	_	_	_	_	PF00629.20|MAM|MAM domain, meprin/A5/mu|m.43743:55-146
c129865_g4	23.00	4.00	2.590	0.412	-2.39	8.87e-02	1.00e+00	no	down	_	_	_	_	_
c110070_g1	23.00	4.00	0.733	0.121	-1.91	8.87e-02	1.00e+00	no	down	_	_	_	_	_
c117126_g1	23.00	4.00	1.307	0.230	-2.09	8.87e-02	1.00e+00	no	down	PREDICTED: uncharacterized protein LOC100895606 [Callithrix jacchus]	_	_	_	_
c114447_g1	23.00	4.00	2.224	0.376	-2.29	8.87e-02	1.00e+00	no	down	_	_	_	_	_
c94363_g1	23.00	4.00	0.904	0.158	-1.96	8.87e-02	1.00e+00	no	down	Amiloride-sensitive sodium channel subunit gamma-2 [Crassostrea gigas]	RecName: Full=FMRFamide-activated amiloride-sensitive sodium channel; AltName: Full=FANACH	_	_	PF00858.21|ASC|Amiloride-sensitive sodium channel|m.26031:24-344
c63189_g1	87.00	20.00	29.631	6.413	-2.19	8.87e-02	1.00e+00	no	down	60S ribosomal protein L34-like protein [Schistosoma mansoni]	RecName: Full=60S ribosomal protein L34; AltName: Full=L31	SJCHGC05074 protein	RP-L34e, RPL34	PF01199.15|Ribosomal_L34e|Ribosomal protein L34e|m.30998:9-101
c124007_g1	3.00	19.00	0.171	0.788	1.71	8.87e-02	1.00e+00	no	up	_	_	_	_	_
c102636_g1	3.00	19.00	0.183	1.200	2.20	8.87e-02	1.00e+00	no	up	_	_	_	_	_
c122097_g4	3.00	19.00	0.269	2.061	2.55	8.87e-02	1.00e+00	no	up	_	_	_	_	_
c105891_g1	3.00	19.00	0.330	1.576	1.96	8.87e-02	1.00e+00	no	up	_	_	_	_	_
c60376_g1	19.00	3.00	1.246	0.194	-2.19	8.87e-02	1.00e+00	no	down	hypothetical protein T265_11465 [Opisthorchis viverrini]	_	_	ARFGAP2_3	_
c121108_g6	19.00	3.00	0.868	0.133	-2.05	8.87e-02	1.00e+00	no	down	_	_	_	_	_
c104107_g1	19.00	3.00	2.370	0.364	-2.41	8.87e-02	1.00e+00	no	down	_	_	_	_	_
c117939_g3	803.00	3070.00	7.087	26.671	1.90	8.88e-02	1.00e+00	no	up	ABCB/P-glycoprotein-like protein [Mytilus galloprovincialis]	_	Multi-drug resistance p-glycoprotein 1 Fragment	ABCB1	PF00664.20|ABC_membrane|ABC transporter transmembrane region|m.38378:87-414;PF00664.20|ABC_membrane|ABC transporter transmembrane region|m.38378:795-1068;PF00005.24|ABC_tran|ABC transporter|m.38378:481-630;PF00005.24|ABC_tran|ABC transporter|m.38378:1135-1286
c121566_g1	286.00	69.00	38.257	8.801	-2.11	8.88e-02	1.00e+00	no	down	PREDICTED: tolloid-like protein 2, partial [Ornithorhynchus anatinus]	RecName: Full=Bone morphogenetic protein 1; Short=BMP-1; Flags: Precursor [Xenopus laevis]	_	BMP1, TLD	PF00431.17|CUB|CUB domain|m.28899:80-195;PF14670.3|FXa_inhibition|Coagulation Factor Xa inhibitory site|m.28899:43-76
c105770_g3	18.00	77.00	0.403	1.709	1.85	8.91e-02	1.00e+00	no	up	_	_	_	_	_
c106111_g1	143.00	551.00	4.277	16.197	1.90	8.93e-02	1.00e+00	no	up	_	_	_	_	PF08205.9|C2-set_2|CD80-like C2-set immunoglobulin domain|m.31431:405-484
c127106_g1	289.00	70.00	17.522	4.013	-2.10	8.95e-02	1.00e+00	no	down	_	_	_	_	_
c103535_g1	71.00	16.00	3.275	0.837	-1.85	8.96e-02	1.00e+00	no	down	_	_	_	_	_
c114499_g5	100.00	389.00	8.590	32.611	1.91	8.97e-02	1.00e+00	no	up	hypothetical protein LOTGIDRAFT_169600 [Lottia gigantea]	_	_	_	PF13688.3|Reprolysin_5|Metallo-peptidase family M12|m.29714:134-295;PF13582.3|Reprolysin_3|Metallo-peptidase family M12B Reprolysin-like|m.29714:170-295
c79892_g1	67.00	15.00	14.284	3.055	-2.19	8.99e-02	1.00e+00	no	down	hypothetical protein T265_05776 [Opisthorchis viverrini]	RecName: Full=60S ribosomal protein L24	Putative uncharacterized protein	RP-L24e, RPL24	PF01246.17|Ribosomal_L24e|Ribosomal protein L24e|m.58648:1-66
c116776_g2	67.00	15.00	2.542	0.558	-2.01	8.99e-02	1.00e+00	no	down	PREDICTED: microfibril-associated glycoprotein 4-like [Pseudopodoces humilis]	RecName: Full=Techylectin-5B; Flags: Precursor [Tachypleus tridentatus]	_	_	_
c101058_g1	703.00	174.00	18.487	4.498	-2.02	8.99e-02	1.00e+00	no	down	hypothetical protein LOTGIDRAFT_105681 [Lottia gigantea]	RecName: Full=Putative protein PHLOEM PROTEIN 2-LIKE A3; Short=AtPP2-A3 [Arabidopsis thaliana]	_	_	PF04548.13|AIG1|AIG1 family|m.18198:6-220;PF01926.20|MMR_HSR1|50S ribosome-binding GTPase|m.18198:7-98
c95531_g1	106.00	411.00	7.111	26.938	1.91	9.00e-02	1.00e+00	no	up	Kynurenine formamidase [Crassostrea gigas]	_	_	_	PF04199.10|Cyclase|Putative cyclase|m.62567:31-202
c121084_g3	106.00	25.00	4.264	1.140	-1.82	9.00e-02	1.00e+00	no	down	_	_	_	_	_
c118625_g1	691.00	171.00	27.468	6.668	-2.03	9.00e-02	1.00e+00	no	down	hypothetical protein LOTGIDRAFT_200320 [Lottia gigantea]	_	_	MMP28	PF00413.21|Peptidase_M10|Matrixin|m.36021:94-253;PF00045.16|Hemopexin|Hemopexin|m.36021:361-399;PF00045.16|Hemopexin|Hemopexin|m.36021:450-492;PF01471.15|PG_binding_1|Putative peptidoglycan binding domain|m.36021:5-56
c116690_g1	24.00	100.00	0.819	3.334	1.90	9.02e-02	1.00e+00	no	up	hypothetical protein BRAFLDRAFT_63342 [Branchiostoma floridae]	_	_	_	PF13489.3|Methyltransf_23|Methyltransferase domain|m.56466:85-252;PF08241.9|Methyltransf_11|Methyltransferase domain|m.56466:101-194;PF13649.3|Methyltransf_25|Methyltransferase domain|m.56466:100-191;PF13847.3|Methyltransf_31|Methyltransferase domain|m.56466:95-214;PF08242.9|Methyltransf_12|Methyltransferase domain|m.56466:101-193;PF01209.15|Ubie_methyltran|ubiE/COQ5 methyltransferase family|m.56…
c116873_g1	32.00	130.00	3.177	12.548	1.95	9.05e-02	1.00e+00	no	up	_	_	_	_	_
c118091_g1	51.00	199.00	36.693	94.634	1.36	9.05e-02	1.00e+00	no	up	_	_	_	_	_
c129664_g3	66.00	257.00	1.698	6.498	1.88	9.08e-02	1.00e+00	no	up	PREDICTED: GTPase IMAP family member 7-like [Myotis brandtii]	_	_	_	PF04548.13|AIG1|AIG1 family|m.686:2-108
c121720_g1	11.00	49.00	2.383	10.050	2.03	9.14e-02	1.00e+00	no	up	_	_	_	_	_
c117625_g5	51.00	11.00	3.556	0.752	-2.10	9.14e-02	1.00e+00	no	down	Fibrillin-1 [Crassostrea gigas]	_	_	FBLN1_2	PF12662.4|cEGF|Complement Clr-like EGF-like|m.37613:28-50;PF12662.4|cEGF|Complement Clr-like EGF-like|m.37613:66-89;PF07645.12|EGF_CA|Calcium-binding EGF domain|m.37613:2-43;PF07645.12|EGF_CA|Calcium-binding EGF domain|m.37613:47-84;PF07645.12|EGF_CA|Calcium-binding EGF domain|m.37613:86-126;PF07645.12|EGF_CA|Calcium-binding EGF domain|m.37613:255-296
c93940_g1	290.00	71.00	72.885	16.997	-2.09	9.18e-02	1.00e+00	no	down	_	_	_	_	_
c75847_g1	78.00	18.00	8.260	1.855	-2.10	9.19e-02	1.00e+00	no	down	anoxia-induced grl-like protein [Littorina littorea]	_	_	_	_
c102683_g1	137.00	33.00	7.478	1.758	-2.03	9.20e-02	1.00e+00	no	down	_	_	_	_	_
c106502_g2	10.00	45.00	0.354	1.564	1.87	9.20e-02	1.00e+00	no	up	_	_	_	_	PF13927.3|Ig_3|Immunoglobulin domain|m.49751:331-406;PF13895.3|Ig_2|Immunoglobulin domain|m.49751:236-304;PF13895.3|Ig_2|Immunoglobulin domain|m.49751:336-409
c117744_g2	10.00	45.00	0.574	2.510	1.95	9.20e-02	1.00e+00	no	up	_	_	_	_	_
c126280_g4	101.00	24.00	6.293	1.467	-2.03	9.24e-02	1.00e+00	no	down	PREDICTED: cytochrome P450 2U1-like [Aplysia californica]	RecName: Full=Cytochrome P450 1A1; AltName: Full=CYPIA1 [Opsanus tau]	_	CYP2U1	PF00067.19|p450|Cytochrome P450|m.72283:8-212
c127686_g1	183.00	44.00	2.651	0.630	-1.91	9.24e-02	1.00e+00	no	down	TPA_exp: pol polyprotein [Schistosoma mansoni]	_	_	_	PF00078.24|RVT_1|Reverse transcriptase (RNA-dependent DNA polymerase)|m.67389:174-332;PF00665.23|rve|Integrase core domain|m.67389:680-789
c128610_g1	73.00	281.00	1.393	5.249	1.84	9.26e-02	1.00e+00	no	up	_	_	_	_	_
c109134_g1	9.00	41.00	0.367	1.903	2.10	9.26e-02	1.00e+00	no	up	hypothetical protein CAPTEDRAFT_210071, partial [Capitella teleta]	_	_	_	_
c124690_g1	9.00	41.00	0.354	1.600	1.90	9.26e-02	1.00e+00	no	up	_	_	_	_	_
c117017_g1	16.00	68.00	0.611	2.485	1.86	9.28e-02	1.00e+00	no	up	_	_	_	_	_
c128430_g5	241.00	59.00	5.364	1.297	-1.97	9.33e-02	1.00e+00	no	down	low-density lipoprotein receptor-related protein 8 precursor [Gallus gallus]	RecName: Full=Low-density lipoprotein receptor-related protein 8; Short=LRP-8; AltName: Full=Apolipoprotein E receptor 2; AltName: Full=Protein LR8B; Flags: Precurs	_	_	PF00431.17|CUB|CUB domain|m.21838:46-145;PF14670.3|FXa_inhibition|Coagulation Factor Xa inhibitory site|m.21838:440-476
c114121_g1	39.00	8.00	3.702	0.740	-2.18	9.33e-02	1.00e+00	no	down	_	_	_	_	PF01607.21|CBM_14|Chitin binding Peritrophin-A domain|m.45087:28-77
c123655_g1	39.00	8.00	1.833	0.364	-2.06	9.33e-02	1.00e+00	no	down	PREDICTED: uncharacterized protein LOC101859410 [Aplysia californica]	_	_	_	_
c115800_g1	39.00	8.00	5.291	1.055	-2.22	9.33e-02	1.00e+00	no	down	_	_	_	_	_
c118578_g4	614.00	154.00	25.183	6.231	-2.00	9.36e-02	1.00e+00	no	down	_	_	_	_	PF07177.9|Neuralized|Neuralized|m.29619:146-212
c88850_g1	20.00	83.00	1.735	7.019	1.96	9.39e-02	1.00e+00	no	up	_	_	_	_	_
c109615_g1	34.00	7.00	1.356	0.279	-1.94	9.42e-02	1.00e+00	no	down	_	_	_	_	_
c116374_g1	13.00	56.00	0.403	1.721	1.86	9.44e-02	1.00e+00	no	up	_	_	_	_	_
c107510_g1	77.00	18.00	2.077	0.473	-1.93	9.49e-02	1.00e+00	no	down	_	_	_	_	_
c92725_g1	1403.00	356.00	100.964	25.010	-2.01	9.50e-02	1.00e+00	no	down	_	_	_	_	_
c118642_g1	72.00	274.00	5.816	20.428	1.79	9.51e-02	1.00e+00	no	up	_	_	_	_	_
c118455_g1	54.00	12.00	3.287	0.776	-1.95	9.51e-02	1.00e+00	no	down	_	_	_	_	_
c114943_g3	6.00	30.00	0.562	2.752	2.11	9.53e-02	1.00e+00	no	up	P-glycoprotein [Perna viridis]	RecName: Full=Multidrug resistance protein 1; AltName: Full=ATP-binding cassette sub-family B member 1; AltName: Full=P-glycoprotein 1; AltName: CD_antigen=CD243	_	ABCB1	PF00005.24|ABC_tran|ABC transporter|m.76203:155-271;PF00664.20|ABC_membrane|ABC transporter transmembrane region|m.76203:1-86
c177156_g1	30.00	6.00	8.480	1.612	-2.33	9.53e-02	1.00e+00	no	down	hypothetical protein T265_08648 [Opisthorchis viverrini]	_	SJCHGC05994 protein	EIF1, SUI1	PF01253.19|SUI1|Translation initiation factor SUI1|m.54990:33-104
c95388_g1	17.00	71.00	2.016	7.480	1.84	9.54e-02	1.00e+00	no	up	hypothetical protein H072_4288 [Dactylellina haptotyla CBS 200.50]	_	_	_	_
c113529_g2	73.00	17.00	2.334	0.655	-1.69	9.54e-02	1.00e+00	no	down	PREDICTED: uncharacterized protein LOC101862849 isoform X1 [Aplysia californica]	_	_	_	_
c124105_g1	70.00	266.00	10.520	37.073	1.81	9.54e-02	1.00e+00	no	up	_	_	_	_	_
c91725_g1	1443.00	5344.00	83.748	303.347	1.86	9.58e-02	1.00e+00	no	up	uncharacterized protein LOC414558 precursor [Xenopus laevis]	_	_	NPC2	PF02221.12|E1_DerP2_DerF2|ML domain|m.16844:21-143
c120158_g1	123.00	461.00	3.592	13.093	1.84	9.59e-02	1.00e+00	no	up	PREDICTED: tenascin-R-like [Amphimedon queenslandica]	_	_	_	PF00147.15|Fibrinogen_C|Fibrinogen beta and gamma chains, C-terminal globular domain|m.55717:338-542
c123650_g1	50.00	11.00	5.841	1.249	-2.14	9.60e-02	1.00e+00	no	down	_	_	_	_	_
c110647_g1	161.00	39.00	9.958	2.364	-2.03	9.63e-02	1.00e+00	no	down	hypothetical protein CAPTEDRAFT_152708 [Capitella teleta]	RecName: Full=Cell number regulator 9; AltName: Full=ZmCNR09 [Zea mays]	_	_	PF04749.14|PLAC8|PLAC8 family|m.22484:62-152
c73638_g1	415.00	105.00	24.633	6.098	-2.00	9.65e-02	1.00e+00	no	down	PREDICTED: GTPase IMAP family member 4-like [Danio rerio]	_	_	_	PF04548.13|AIG1|AIG1 family|m.48977:24-211;PF01926.20|MMR_HSR1|50S ribosome-binding GTPase|m.48977:26-134
c102702_g1	5.00	26.00	0.367	1.831	2.05	9.66e-02	1.00e+00	no	up	_	_	_	_	PF00386.18|C1q|C1q domain|m.24766:87-202
c112417_g2	5.00	26.00	0.721	3.601	2.17	9.66e-02	1.00e+00	no	up	_	_	_	_	_
c7795_g1	26.00	5.00	2.212	0.412	-2.17	9.66e-02	1.00e+00	no	down	GTP:AMP Phosphotransferase [Clonorchis sinensis]	RecName: Full=GTP:AMP phosphotransferase AK3, mitochondrial; AltName: Full=Adenylate kinase 3; Short=AK 3; AltName: Full=Adenylate kinase 3 alpha-like 1 [Mus muscul	SJCHGC05778 protein	adk, AK	PF00406.19|ADK|Adenylate kinase|m.3039:17-196;PF13207.3|AAA_17|AAA domain|m.3039:18-133;PF05191.11|ADK_lid|Adenylate kinase, active site lid|m.3039:133-168
c89051_g1	26.00	5.00	3.275	0.606	-2.26	9.66e-02	1.00e+00	no	down	Putative aminopeptidase W07G4.4 [Crassostrea gigas]	_	_	CARP, pepA	_
c104321_g3	26.00	5.00	3.996	0.740	-2.29	9.66e-02	1.00e+00	no	down	tubulin alpha-3 [Fasciola hepatica]	RecName: Full=Tubulin alpha chain	similar to alpha-tubulin	TUBA	PF03953.14|Tubulin_C|Tubulin C-terminal domain|m.5946:60-188
c116370_g1	26.00	5.00	1.381	0.255	-2.06	9.66e-02	1.00e+00	no	down	_	_	_	_	_
c116377_g1	26.00	5.00	1.588	0.303	-2.07	9.66e-02	1.00e+00	no	down	_	_	_	_	_
c108249_g1	26.00	5.00	1.540	0.291	-2.07	9.66e-02	1.00e+00	no	down	_	_	_	_	_
c122583_g2	552.00	140.00	21.884	5.443	-1.99	9.67e-02	1.00e+00	no	down	Arylsulfatase B [Crassostrea gigas]	_	_	_	PF00884.20|Sulfatase|Sulfatase|m.49677:3-96
c126236_g4	10.00	44.00	1.136	4.849	2.00	9.69e-02	1.00e+00	no	up	_	_	_	_	_
c129494_g2	10.00	44.00	0.415	2.182	2.15	9.69e-02	1.00e+00	no	up	_	_	_	_	_
c112006_g1	10.00	44.00	0.452	2.982	2.48	9.69e-02	1.00e+00	no	up	_	_	_	_	PF00680.17|RdRP_1|RNA dependent RNA polymerase|m.40416:355-469;PF00548.17|Peptidase_C3|3C cysteine protease (picornain 3C)|m.40416:141-178
c109359_g1	10.00	44.00	0.501	2.061	1.85	9.69e-02	1.00e+00	no	up	_	_	_	_	_
c112127_g5	46.00	10.00	6.513	1.067	-2.50	9.69e-02	1.00e+00	no	down	_	_	_	_	_
c103918_g1	2265.00	581.00	102.320	25.713	-1.99	9.69e-02	1.00e+00	no	down	PREDICTED: uncharacterized protein LOC101858445 [Aplysia californica]	_	_	_	PF00307.28|CH|Calponin homology (CH) domain|m.16387:36-141
c113120_g2	19.00	78.00	2.358	18.258	2.90	9.72e-02	1.00e+00	no	up	_	_	_	_	_
c127091_g2	110.00	413.00	3.250	11.953	1.85	9.73e-02	1.00e+00	no	up	PREDICTED: GTPase IMAP family member 8-like, partial [Oreochromis niloticus]	RecName: Full=GTPase IMAP family member 4; AltName: Full=Immunity-associated nucleotide 1 protein; Short=IAN-1; Short=hIAN1; AltName: Full=Immunity-associated prot	_	_	PF04548.13|AIG1|AIG1 family|m.63051:61-263;PF01926.20|MMR_HSR1|50S ribosome-binding GTPase|m.63051:62-181
c114643_g1	244.00	61.00	13.685	3.346	-2.00	9.77e-02	1.00e+00	no	down	_	_	_	_	_
c128480_g4	126.00	31.00	3.482	0.837	-1.93	9.79e-02	1.00e+00	no	down	_	_	_	_	_
c110688_g1	9.00	40.00	0.318	2.049	2.36	9.80e-02	1.00e+00	no	up	_	_	_	_	_
c77721_g1	42.00	9.00	24.804	4.886	-2.32	9.80e-02	1.00e+00	no	down	hypothetical protein T265_12188 [Opisthorchis viverrini]	_	SJCHGC09642 protein	RP-L36e, RPL36	PF01158.15|Ribosomal_L36e|Ribosomal protein L36e|m.54413:19-112
c111739_g1	42.00	9.00	1.784	0.376	-1.98	9.80e-02	1.00e+00	no	down	PREDICTED: baculoviral IAP repeat-containing protein 3-like isoform X1 [Aplysia californica]	_	_	XIAP, BIRC4	PF00653.18|BIR|Inhibitor of Apoptosis domain|m.67895:17-81;PF00653.18|BIR|Inhibitor of Apoptosis domain|m.67895:137-201;PF13920.3|zf-C3HC4_3|Zinc finger, C3HC4 type (RING finger)|m.67895:343-386
c115169_g2	42.00	9.00	6.452	1.334	-2.19	9.80e-02	1.00e+00	no	down	_	_	_	_	_
c107367_g1	42.00	9.00	1.259	0.267	-1.89	9.80e-02	1.00e+00	no	down	_	_	_	_	_
c107025_g1	4.00	22.00	0.293	1.637	2.14	9.83e-02	1.00e+00	no	up	_	_	_	_	_
c127926_g3	4.00	22.00	0.293	1.552	2.07	9.83e-02	1.00e+00	no	up	_	_	_	_	_
c81870_g1	4.00	22.00	1.332	6.959	2.30	9.83e-02	1.00e+00	no	up	_	_	_	_	_
c91715_g1	4.00	22.00	0.354	1.879	2.12	9.83e-02	1.00e+00	no	up	_	_	_	_	_
c97207_g1	4.00	22.00	0.501	2.667	2.20	9.83e-02	1.00e+00	no	up	_	_	_	_	_
c110057_g1	22.00	4.00	0.489	0.085	-1.67	9.83e-02	1.00e+00	no	down	PREDICTED: potassium voltage-gated channel subfamily C member 2-like, partial [Aplysia californica]	RecName: Full=Potassium voltage-gated channel protein Shaw; AltName: Full=Shaw2 [Drosophila melanogaster]	_	KCNCN	PF00520.28|Ion_trans|Ion transport protein|m.27818:255-542;PF02214.19|BTB_2|BTB/POZ domain|m.27818:104-194;PF07885.13|Ion_trans_2|Ion channel|m.27818:458-534
c116217_g1	22.00	4.00	1.527	0.267	-2.15	9.83e-02	1.00e+00	no	down	hypothetical protein CAPTEDRAFT_211318, partial [Capitella teleta]	_	_	_	PF09612.7|HtrL_YibB|Bacterial protein of unknown function (HtrL_YibB)|m.66730:2-125
c124611_g2	22.00	4.00	4.655	0.812	-2.38	9.83e-02	1.00e+00	no	down	_	_	_	_	_
c113971_g2	22.00	4.00	2.468	0.449	-2.23	9.83e-02	1.00e+00	no	down	_	_	_	_	_
c112936_g1	57.00	13.00	4.167	0.933	-2.05	9.85e-02	1.00e+00	no	down	_	_	_	_	_
c127105_g1	43.00	163.00	1.197	4.510	1.83	9.86e-02	1.00e+00	no	up	_	_	_	_	_
c104036_g1	919.00	237.00	61.656	15.530	-1.98	9.90e-02	1.00e+00	no	down	PREDICTED: chymotrypsinogen 2-like [Sus scrofa]	_	_	F12	PF00089.23|Trypsin|Trypsin|m.68846:42-270
c104773_g1	8.00	37.00	0.501	2.267	1.98	9.94e-02	1.00e+00	no	up	Deleted in malignant brain tumors 1 protein [Crassostrea gigas]	_	_	_	_
c121554_g7	37.00	8.00	1.466	0.315	-1.92	9.94e-02	1.00e+00	no	down	_	_	_	_	_
c128092_g1	154.00	568.00	3.507	12.693	1.83	9.95e-02	1.00e+00	no	up	_	_	_	_	_
c111743_g1	68.00	16.00	4.716	0.994	-2.14	9.95e-02	1.00e+00	no	down	_	_	_	_	_
c110473_g2	12.00	51.00	0.464	1.940	1.85	9.95e-02	1.00e+00	no	up	_	_	_	_	_
c128766_g1	219.00	55.00	7.001	1.721	-1.96	1.00e-01	1.00e+00	no	down	PREDICTED: caspase-3-like [Aplysia californica]	RecName: Full=Caspase-1; Contains: RecName: Full=Caspase-1 subunit p19/18; Contains: RecName: Full=Caspase-1 subunit p12; Flags: Precursor [Spodoptera frugiperda]	_	CASP7	PF00656.19|Peptidase_C14|Caspase domain|m.6130:46-281
c92669_g1	3.00	18.00	0.171	1.018	2.04	1.00e-01	1.00e+00	no	up	_	_	_	_	_
c114262_g2	3.00	18.00	0.244	1.418	2.14	1.00e-01	1.00e+00	no	up	_	_	_	_	_
c123258_g4	3.00	18.00	0.232	1.370	2.15	1.00e-01	1.00e+00	no	up	_	_	_	_	_
c109191_g3	3.00	18.00	0.281	1.673	2.22	1.00e-01	1.00e+00	no	up	_	_	_	_	_
c114499_g7	3.00	18.00	1.063	6.025	2.40	1.00e-01	1.00e+00	no	up	_	_	_	_	_
c123045_g2	3.00	18.00	13.037	64.144	2.29	1.00e-01	1.00e+00	no	up	_	_	_	_	_
c86242_g1	3.00	18.00	1.979	10.850	2.40	1.00e-01	1.00e+00	no	up	_	_	_	_	_
c48759_g1	3.00	18.00	0.196	1.127	2.05	1.00e-01	1.00e+00	no	up	_	_	_	_	_
c66490_g1	18.00	3.00	29.521	4.267	-2.76	1.00e-01	1.00e+00	no	down	Caveolin-1 [Crassostrea gigas]	RecName: Full=Caveolin-1	_	_	_
c88505_g1	18.00	3.00	1.393	0.230	-2.18	1.00e-01	1.00e+00	no	down	inhibitor of apoptosis protein,putative [Schistosoma mansoni]	_	_	_	PF00653.18|BIR|Inhibitor of Apoptosis domain|m.61176:60-130
c109031_g1	18.00	3.00	0.806	0.133	-1.96	1.00e-01	1.00e+00	no	down	_	_	_	_	_
c56694_g1	18.00	3.00	1.637	0.267	-2.24	1.00e-01	1.00e+00	no	down	_	_	_	_	_
c103249_g1	18.00	3.00	2.077	0.339	-2.31	1.00e-01	1.00e+00	no	down	_	_	_	_	_
c124541_g1	64.00	15.00	4.558	1.418	-1.62	1.00e-01	1.00e+00	no	down	_	_	_	_	_
c112534_g1	90.00	22.00	2.175	0.521	-1.87	1.01e-01	1.00e+00	no	down	PREDICTED: kelch-like protein 28-like [Oryzias latipes]	_	_	KLHL28	PF07707.12|BACK|BTB And C-terminal Kelch|m.53364:131-229;PF01344.22|Kelch_1|Kelch motif|m.53364:422-457;PF00651.28|BTB|BTB/POZ domain|m.53364:21-123;PF00917.23|MATH|MATH domain|m.53364:617-730
c117740_g1	33.00	7.00	2.920	0.618	-2.07	1.01e-01	1.00e+00	no	down	_	_	_	_	_
c119975_g2	33.00	7.00	1.344	0.279	-1.93	1.01e-01	1.00e+00	no	down	_	_	_	_	_
c79226_g1	33.00	7.00	14.259	2.825	-2.30	1.01e-01	1.00e+00	no	down	_	_	_	_	_
c107065_g1	33.00	7.00	0.978	0.206	-1.82	1.01e-01	1.00e+00	no	down	_	_	_	_	_
c107299_g1	75.00	18.00	3.287	0.764	-1.97	1.01e-01	1.00e+00	no	down	_	_	_	_	_
c128010_g1	327.00	84.00	37.793	9.105	-2.04	1.01e-01	1.00e+00	no	down	_	_	_	_	_
c91297_g1	128.00	32.00	25.623	5.965	-2.08	1.01e-01	1.00e+00	no	down	PREDICTED: temptin-like [Aplysia californica]	_	_	_	_
c124994_g1	128.00	32.00	3.605	0.921	-1.86	1.01e-01	1.00e+00	no	down	PREDICTED: stimulated by retinoic acid gene 6 protein homolog [Aplysia californica]	_	_	_	PF14752.3|RBP_receptor|Retinol binding protein receptor|m.31369:21-303;PF14752.3|RBP_receptor|Retinol binding protein receptor|m.31369:317-595
c114700_g1	50.00	186.00	1.882	6.862	1.81	1.01e-01	1.00e+00	no	up	_	_	_	_	_
c128079_g2	970.00	3505.00	12.451	44.286	1.82	1.02e-01	1.00e+00	no	up	PREDICTED: uncharacterized protein LOC101862922 [Aplysia californica]	RecName: Full=Nose resistant to fluoxetine protein 6; Short=Protein nrf-6; Flags: Precursor [Caenorhabditis elegans]	_	_	PF01757.19|Acyl_transf_3|Acyltransferase family|m.1888:400-781
c118792_g1	45.00	10.00	0.745	0.170	-1.65	1.02e-01	1.00e+00	no	down	_	_	_	_	_
c110874_g1	108.00	27.00	10.337	2.510	-2.00	1.02e-01	1.00e+00	no	down	_	_	_	_	_
c109849_g1	373.00	1348.00	29.337	103.399	1.81	1.03e-01	1.00e+00	no	up	hypothetical protein LOTGIDRAFT_229397 [Lottia gigantea]	RecName: Full=Neuropeptide F; Short=NPF	_	_	_
c118156_g1	6.00	29.00	0.916	4.292	2.11	1.03e-01	1.00e+00	no	up	_	_	_	_	_
c104148_g1	29.00	6.00	0.953	0.194	-1.84	1.03e-01	1.00e+00	no	down	hypothetical protein FOQG_15973 [Fusarium oxysporum f. sp. raphani 54005]	RecName: Full=Ankyrin-1; Short=ANK-1; AltName: Full=Ankyrin-R; AltName: Full=Erythrocyte ankyrin [Homo sapiens]	_	_	PF12796.4|Ank_2|Ankyrin repeats (3 copies)|m.15204:12-73;PF12796.4|Ank_2|Ankyrin repeats (3 copies)|m.15204:77-140;PF12796.4|Ank_2|Ankyrin repeats (3 copies)|m.15204:111-173;PF12796.4|Ank_2|Ankyrin repeats (3 copies)|m.15204:144-206;PF12796.4|Ank_2|Ankyrin repeats (3 copies)|m.15204:177-239;PF12796.4|Ank_2|Ankyrin repeats (3 copies)|m.15204:215-305;PF12796.4|Ank_2|Ankyrin repeats (3 copies)|m.152…
c134557_g1	29.00	6.00	4.558	0.909	-2.21	1.03e-01	1.00e+00	no	down	calmodulin-like protein 2 (CaM2) [Fasciola hepatica]	_	_	CALM	PF00036.29|EF-hand_1|EF hand|m.70846:21-47;PF00036.29|EF-hand_1|EF hand|m.70846:56-82;PF00036.29|EF-hand_1|EF hand|m.70846:94-120;PF13499.3|EF-hand_7|EF-hand domain pair|m.70846:19-81;PF13499.3|EF-hand_7|EF-hand domain pair|m.70846:93-154;PF13202.3|EF-hand_5|EF hand|m.70846:21-45;PF13202.3|EF-hand_5|EF hand|m.70846:59-81;PF13202.3|EF-hand_5|EF hand|m.70846:95-117;PF13202.3|EF-hand_5|EF hand|m.708…
c66055_g1	29.00	6.00	7.050	1.394	-2.26	1.03e-01	1.00e+00	no	down	_	_	_	_	_
c124781_g1	48.00	178.00	3.250	14.148	2.09	1.04e-01	1.00e+00	no	up	_	_	_	_	_
c122196_g1	272.00	70.00	9.066	2.291	-1.94	1.04e-01	1.00e+00	no	down	_	_	_	_	_
c118773_g1	262.00	942.00	16.190	56.894	1.81	1.04e-01	1.00e+00	no	up	PREDICTED: uncharacterized protein LOC101849999 [Aplysia californica]	_	_	_	PF01607.21|CBM_14|Chitin binding Peritrophin-A domain|m.48601:19-65;PF01607.21|CBM_14|Chitin binding Peritrophin-A domain|m.48601:76-126
c120085_g1	178.00	45.00	13.123	3.237	-1.99	1.04e-01	1.00e+00	no	down	_	_	_	_	_
c103575_g1	52.00	12.00	3.287	0.740	-2.01	1.04e-01	1.00e+00	no	down	_	_	_	_	_
c113191_g1	85.00	21.00	2.260	0.546	-1.87	1.04e-01	1.00e+00	no	down	_	_	_	_	_
c93730_g1	85.00	21.00	20.955	4.934	-2.06	1.04e-01	1.00e+00	no	down	hypothetical protein T265_08046 [Opisthorchis viverrini]	RecName: Full=40S ribosomal protein S23 [Dermacentor variabilis]	SJCHGC02768 protein	RP-S23e, RPS23	PF00164.22|Ribosom_S12_S23|Ribosomal protein S12/S23|m.59393:20-153
c102364_g1	43.00	159.00	6.036	21.555	1.82	1.05e-01	1.00e+00	no	up	_	_	_	_	_
c128006_g1	1021.00	269.00	23.020	5.843	-1.96	1.05e-01	1.00e+00	no	down	hypothetical protein LOTGIDRAFT_203896 [Lottia gigantea]	_	_	BOI	PF13920.3|zf-C3HC4_3|Zinc finger, C3HC4 type (RING finger)|m.36000:256-297
c118548_g1	16707.00	59560.00	742.353	2532.966	1.77	1.05e-01	1.00e+00	no	up	_	_	_	_	_
c123407_g1	2720.00	721.00	49.168	30.635	-0.68	1.05e-01	1.00e+00	no	down	hypothetical protein BRAFLDRAFT_66573 [Branchiostoma floridae]	_	_	OAS	PF10421.6|OAS1_C|2'-5'-oligoadenylate synthetase 1, domain 2, C-terminus|m.29509:167-300;PF01909.20|NTP_transf_2|Nucleotidyltransferase domain|m.29509:45-99
c115165_g1	23.00	90.00	0.855	3.273	1.82	1.05e-01	1.00e+00	no	up	_	_	_	_	_
c73638_g2	477.00	125.00	14.308	3.685	-1.93	1.05e-01	1.00e+00	no	down	GTPase IMAP family member 7 [Anoplopoma fimbria]	_	_	_	PF04548.13|AIG1|AIG1 family|m.5911:30-212;PF01926.20|MMR_HSR1|50S ribosome-binding GTPase|m.5911:30-136
c119734_g1	5.00	25.00	0.696	3.370	2.12	1.06e-01	1.00e+00	no	up	_	_	_	_	_
c120889_g3	5.00	25.00	0.220	1.079	1.88	1.06e-01	1.00e+00	no	up	_	_	_	_	_
c126118_g1	25.00	5.00	1.307	0.255	-1.99	1.06e-01	1.00e+00	no	down	_	_	_	_	_
c124855_g1	8.00	36.00	0.415	2.109	2.10	1.06e-01	1.00e+00	no	up	_	_	_	_	_
c68674_g1	36.00	8.00	30.205	6.049	-2.30	1.06e-01	1.00e+00	no	down	macrophage expressed protein [Haliotis diversicolor]	_	_	_	_
c100628_g1	1174.00	4168.00	83.662	289.975	1.79	1.06e-01	1.00e+00	no	up	hypothetical protein CGI_10019538 [Crassostrea gigas]	_	_	_	_
c97726_g1	1358.00	361.00	264.439	67.441	-1.97	1.06e-01	1.00e+00	no	down	_	_	_	_	_
c119307_g2	2501.00	8868.00	106.279	369.419	1.80	1.06e-01	1.00e+00	no	up	_	_	_	_	_
c112613_g1	90.00	327.00	5.560	19.749	1.81	1.06e-01	1.00e+00	no	up	_	_	_	_	_
c87706_g1	88.00	22.00	10.459	2.534	-2.00	1.06e-01	1.00e+00	no	down	Conserved hypothetical protein [Schistosoma japonicum]	_	_	PTGES3	_
c125089_g1	1260.00	4463.00	26.478	96.101	1.86	1.07e-01	1.00e+00	no	up	hypothetical protein LOTGIDRAFT_174864 [Lottia gigantea]	_	_	ADAMTS13	PF13688.3|Reprolysin_5|Metallo-peptidase family M12|m.53724:54-228;PF13582.3|Reprolysin_3|Metallo-peptidase family M12B Reprolysin-like|m.53724:75-203;PF13574.3|Reprolysin_2|Metallo-peptidase family M12B Reprolysin-like|m.53724:117-241;PF13583.3|Reprolysin_4|Metallo-peptidase family M12B Reprolysin-like|m.53724:153-247
c129353_g1	357.00	94.00	38.917	12.596	-1.62	1.07e-01	1.00e+00	no	down	PREDICTED: putative peroxisomal-coenzyme A synthetase-like [Aplysia californica]	_	_	entE, dhbE, vibE, mxcE	PF00501.25|AMP-binding|AMP-binding enzyme|m.55019:1-45;PF13193.3|AMP-binding_C|AMP-binding enzyme C-terminal domain|m.55019:57-136
c104850_g1	176.00	45.00	10.960	2.752	-1.96	1.07e-01	1.00e+00	no	down	_	_	_	_	PF01693.13|Cauli_VI|Caulimovirus viroplasmin|m.38989:6-49
c115095_g2	55.00	13.00	1.857	0.255	-2.46	1.07e-01	1.00e+00	no	down	PREDICTED: TPR and ankyrin repeat-containing protein 1-like [Lepisosteus oculatus]	RecName: Full=TPR and ankyrin repeat-containing protein 1; AltName: Full=Lupus brain antigen 1 [Mus musculus]	_	_	_
c124128_g1	473.00	125.00	11.999	3.116	-1.91	1.08e-01	1.00e+00	no	down	_	_	_	_	_
c124569_g2	134.00	478.00	3.886	13.530	1.77	1.08e-01	1.00e+00	no	up	PREDICTED: uncharacterized protein LOC100378011 [Saccoglossus kowalevskii]	_	_	_	PF13519.3|VWA_2|von Willebrand factor type A domain|m.16771:44-156;PF00092.25|VWA|von Willebrand factor type A domain|m.16771:43-198
c113440_g1	144.00	514.00	11.119	38.722	1.79	1.08e-01	1.00e+00	no	up	_	_	_	_	PF06140.10|Ifi-6-16|Interferon-induced 6-16 family|m.18347:65-137
c111954_g1	26.00	100.00	2.053	7.541	1.83	1.08e-01	1.00e+00	no	up	_	_	_	_	_
c36904_g2	10.00	42.00	14.039	51.572	1.87	1.08e-01	1.00e+00	no	up	_	_	_	_	_
c117303_g1	73.00	18.00	1.466	0.364	-1.75	1.08e-01	1.00e+00	no	down	hypothetical protein LOTGIDRAFT_132036, partial [Lottia gigantea]	RecName: Full=Telomerase protein component 1; AltName: Full=Telomerase-associated protein 1; Short=Telomerase protein 1; AltName: Full=p240; AltName: Full=p80 telo	_	_	PF13271.3|DUF4062|Domain of unknown function (DUF4062)|m.11918:124-235
c112892_g1	73.00	18.00	3.006	0.727	-1.91	1.08e-01	1.00e+00	no	down	hypothetical protein LOTGIDRAFT_227965 [Lottia gigantea]	_	_	_	_
c127619_g2	53.00	192.00	3.226	11.287	1.78	1.08e-01	1.00e+00	no	up	_	_	_	_	_
c111363_g1	289.00	76.00	13.367	3.443	-1.93	1.08e-01	1.00e+00	no	down	_	_	_	_	_
c114407_g2	47.00	171.00	2.456	10.244	2.02	1.08e-01	1.00e+00	no	up	_	_	_	_	_
c103974_g1	32.00	7.00	2.053	0.436	-2.01	1.08e-01	1.00e+00	no	down	_	_	_	_	_
c115579_g2	32.00	7.00	1.857	0.400	-1.97	1.08e-01	1.00e+00	no	down	_	_	_	_	_
c117548_g3	32.00	7.00	2.871	0.655	-1.98	1.08e-01	1.00e+00	no	down	PREDICTED: LOW QUALITY PROTEIN: mismatch repair endonuclease PMS2-like [Xiphophorus maculatus]	RecName: Full=Mismatch repair endonuclease PMS2; AltName: Full=DNA mismatch repair protein PMS2; AltName: Full=PMS1 protein homolog 2 [Homo sapiens]	_	PMS2	_
c121361_g3	20.00	78.00	2.419	9.141	1.88	1.09e-01	1.00e+00	no	up	_	_	_	_	_
c105823_g1	122.00	433.00	11.816	40.770	1.78	1.09e-01	1.00e+00	no	up	_	_	_	_	_
c97485_g1	51.00	12.00	1.356	0.315	-1.81	1.09e-01	1.00e+00	no	down	hypothetical protein LOTGIDRAFT_214741 [Lottia gigantea]	RecName: Full=Dimethylaniline monooxygenase [N-oxide-forming]	_	FMO	PF00743.16|FMO-like|Flavin-binding monooxygenase-like|m.32483:4-529;PF13738.3|Pyr_redox_3|Pyridine nucleotide-disulphide oxidoreductase|m.32483:8-227;PF13434.3|K_oxygenase|L-lysine 6-monooxygenase (NADPH-requiring)|m.32483:100-206;PF07992.11|Pyr_redox_2|Pyridine nucleotide-disulphide oxidoreductase|m.32483:4-208;PF13450.3|NAD_binding_8|NAD(P)-binding Rossmann-like domain|m.32483:8-58
c36257_g2	21.00	4.00	1.796	0.339	-2.11	1.09e-01	1.00e+00	no	down	hypothetical protein T265_05734 [Opisthorchis viverrini]	RecName: Full=Nucleolar protein 58; AltName: Full=Nucleolar protein 5 [Homo sapiens]	_	NOP58	PF01798.15|Nop|snoRNA binding domain, fibrillarin|m.2767:176-293;PF08156.10|NOP5NT|NOP5NT (NUC127) domain|m.2767:8-72
c75424_g1	21.00	4.00	5.327	0.970	-2.34	1.09e-01	1.00e+00	no	down	60S ribosomal protein L27 [Latrodectus hesperus]	_	60S ribosomal protein L27, putative	RP-L27e, RPL27	PF01777.15|Ribosomal_L27e|Ribosomal L27e protein family|m.36434:53-136
c102228_g2	21.00	4.00	3.079	0.570	-2.25	1.09e-01	1.00e+00	no	down	_	_	_	_	_
c110171_g1	21.00	4.00	3.287	0.655	-2.17	1.09e-01	1.00e+00	no	down	PREDICTED: zinc finger protein 14 homolog [Loxodonta africana]	RecName: Full=Zinc finger protein 208; AltName: Full=Zinc finger protein 91-like [Homo sapiens]	_	KRAB	_
c48840_g1	21.00	4.00	3.947	0.715	-2.31	1.09e-01	1.00e+00	no	down	putative 60S ribosomal protein L23 [Maconellicoccus hirsutus]	RecName: Full=60S ribosomal protein L23; AltName: Full=L17A [Drosophila melanogaster]	similar to ribosomal protein L23	RP-L23e, RPL23	PF00238.16|Ribosomal_L14|Ribosomal protein L14p/L23e|m.45148:35-152
c123294_g6	21.00	4.00	2.395	0.449	-2.18	1.09e-01	1.00e+00	no	down	_	_	_	_	_
c86184_g1	484.00	129.00	19.477	5.092	-1.91	1.10e-01	1.00e+00	no	down	hypothetical protein CARUB_v10003783mg [Capsella rubella]	_	_	_	PF04548.13|AIG1|AIG1 family|m.1862:13-194;PF01926.20|MMR_HSR1|50S ribosome-binding GTPase|m.1862:14-116;PF00350.20|Dynamin_N|Dynamin family|m.1862:15-67
c126582_g1	21.00	81.00	0.293	1.224	1.75	1.11e-01	1.00e+00	no	up	PREDICTED: uncharacterized protein LOC101862849 isoform X1 [Aplysia californica]	_	_	_	_
c115884_g1	16.00	63.00	0.452	1.746	1.74	1.11e-01	1.00e+00	no	up	PREDICTED: NADPH-dependent diflavin oxidoreductase 1 isoform X2 [Gallus gallus]	RecName: Full=NADPH-dependent diflavin oxidoreductase 1; AltName: Full=NADPH-dependent FMN and FAD-containing oxidoreductase; AltName: Full=Novel reductase 1 [Homo	_	_	PF00667.17|FAD_binding_1|FAD binding domain|m.23587:209-426;PF00258.22|Flavodoxin_1|Flavodoxin|m.23587:9-142;PF00175.18|NAD_binding_1|Oxidoreductase NAD-binding domain|m.23587:459-564
c122412_g1	496.00	1731.00	10.484	35.970	1.77	1.11e-01	1.00e+00	no	up	PREDICTED: uncharacterized protein LOC101859542 [Aplysia californica]	_	_	_	PF01607.21|CBM_14|Chitin binding Peritrophin-A domain|m.30242:27-77;PF01607.21|CBM_14|Chitin binding Peritrophin-A domain|m.30242:83-137
c112201_g2	47.00	11.00	2.957	0.679	-1.97	1.11e-01	1.00e+00	no	down	hypothetical protein BRAFLDRAFT_68921 [Branchiostoma floridae]	_	_	DMBT1	PF00530.15|SRCR|Scavenger receptor cysteine-rich domain|m.54639:11-106;PF00530.15|SRCR|Scavenger receptor cysteine-rich domain|m.54639:159-236
c117980_g2	18.00	70.00	0.623	2.364	1.77	1.11e-01	1.00e+00	no	up	_	_	_	_	_
c126430_g1	72.00	18.00	10.997	2.655	-2.01	1.11e-01	1.00e+00	no	down	_	_	_	_	_
c108258_g1	97.00	25.00	2.774	0.703	-1.84	1.11e-01	1.00e+00	no	down	PREDICTED: neuroligin-2-like [Aplysia californica]	RecName: Full=Neuroligin-4, X-linked; Short=Neuroligin X; AltName: Full=HNLX; Flags: Precursor [Homo sapiens]	_	NLGN	PF00135.25|COesterase|Carboxylesterase family|m.72140:24-536
c70787_g1	965.00	261.00	68.303	18.039	-1.91	1.12e-01	1.00e+00	no	down	_	_	_	_	_
c117623_g2	6.00	28.00	0.281	1.273	1.85	1.12e-01	1.00e+00	no	up	PREDICTED: uncharacterized protein LOC101863520 [Aplysia californica]	_	_	_	PF13383.3|Methyltransf_22|Methyltransferase domain|m.1559:62-273;PF05050.9|Methyltransf_21|Methyltransferase FkbM domain|m.1559:120-244
c104939_g3	6.00	28.00	0.379	1.721	1.93	1.12e-01	1.00e+00	no	up	_	_	_	_	_
c118533_g1	6.00	28.00	0.452	2.000	1.93	1.12e-01	1.00e+00	no	up	_	_	_	_	_
c116020_g3	28.00	6.00	2.114	0.436	-2.05	1.12e-01	1.00e+00	no	down	_	_	_	_	_
c100619_g1	28.00	6.00	2.981	0.606	-2.13	1.12e-01	1.00e+00	no	down	hypothetical protein H257_10693 [Aphanomyces astaci]	_	_	_	_
c104760_g1	28.00	6.00	4.069	0.849	-2.14	1.12e-01	1.00e+00	no	down	_	_	_	_	_
c109498_g1	360.00	97.00	42.204	12.014	-1.80	1.13e-01	1.00e+00	no	down	PREDICTED: DNA polymerase delta catalytic subunit [Anolis carolinensis]	_	_	POLD1	_
c106009_g1	15.00	59.00	1.246	4.752	1.85	1.13e-01	1.00e+00	no	up	_	_	_	_	_
c66305_g4	110.00	389.00	29.789	100.077	1.74	1.13e-01	1.00e+00	no	up	_	_	_	_	_
c118942_g1	8.00	35.00	0.147	0.643	1.59	1.13e-01	1.00e+00	no	up	_	_	_	_	PF00580.18|UvrD-helicase|UvrD/REP helicase N-terminal domain|m.52559:150-260;PF16739.2|CARD_2|Caspase recruitment domain|m.52559:12-86;PF13245.3|AAA_19|Part of AAA domain|m.52559:155-213
c103844_g1	8.00	35.00	1.576	6.389	1.95	1.13e-01	1.00e+00	no	up	_	_	_	_	_
c95855_g1	35.00	8.00	3.214	0.715	-2.02	1.13e-01	1.00e+00	no	down	similar to GenBank Accession Number Z29075 myophilin antigen in Echinococcus granulosus [Schistosoma myophilin-like protein [Echinococ	RecName: Full=Myophilin	Clone ZZZ59 mRNA sequence	_	PF00307.28|CH|Calponin homology (CH) domain|m.121:38-143;PF00402.15|Calponin|Calponin family repeat|m.121:178-200
c87261_g1	4150.00	14321.00	242.201	817.469	1.75	1.13e-01	1.00e+00	no	up	Short-chain collagen C4 [Crassostrea gigas]	_	_	_	_
c100245_g1	273.00	947.00	12.549	42.662	1.76	1.13e-01	1.00e+00	no	up	PREDICTED: short-chain collagen C4-like [Amphimedon queenslandica]	_	_	_	_
c112154_g2	43.00	10.00	1.210	0.315	-1.66	1.14e-01	1.00e+00	no	down	PREDICTED: uncharacterized protein LOC101851917, partial [Aplysia californica]	RecName: Full=Transcriptional regulator ERG homolog	PREDICTED: similar to conserved hypothetical protein [Tribolium castaneum].	ERG	PF00178.19|Ets|Ets-domain|m.77437:168-246
c89426_g1	43.00	10.00	6.134	1.382	-2.07	1.14e-01	1.00e+00	no	down	Kielin/chordin-like protein [Crassostrea gigas]	_	_	_	PF05375.10|Pacifastin_I|Pacifastin inhibitor (LCMII)|m.25110:71-100
c117012_g3	756.00	206.00	61.815	16.415	-1.91	1.14e-01	1.00e+00	no	down	_	_	_	_	_
c117490_g2	3.00	17.00	0.305	1.673	2.13	1.14e-01	1.00e+00	no	up	_	_	_	_	_
c114989_g1	3.00	17.00	0.171	0.958	1.96	1.14e-01	1.00e+00	no	up	_	_	_	_	_
c75620_g1	3.00	17.00	10.863	50.905	2.22	1.14e-01	1.00e+00	no	up	Low-density lipoprotein receptor-related protein 2 [Pteropus alecto]	RecName: Full=Low-density lipoprotein receptor-related protein 2; Short=LRP-2; AltName: Full=Glycoprotein 330; Short=gp330; AltName: Full=Megalin; Flags: Precursor [Ra	_	LRP2	_
c111458_g1	3.00	17.00	0.073	0.388	1.50	1.14e-01	1.00e+00	no	up	hypothetical protein LOTGIDRAFT_128629 [Lottia gigantea]	RecName: Full=Aquaporin-9; Short=AQP-9; AltName: Full=Aquaglyceroporin-9; AltName: Full=Small solute channel 1 [Homo sapiens]	_	AQP9	PF00230.17|MIP|Major intrinsic protein|m.14465:7-250
c125706_g2	17.00	3.00	2.480	0.424	-2.30	1.14e-01	1.00e+00	no	down	_	_	_	_	_
c116536_g3	17.00	3.00	0.819	0.145	-1.91	1.14e-01	1.00e+00	no	down	_	_	_	_	_
c55671_g1	17.00	3.00	1.540	0.267	-2.16	1.14e-01	1.00e+00	no	down	glutathione s transferase mu [Echinococcus granulosus]	RecName: Full=Glutathione S-transferase Mu 1; AltName: Full=GST class-mu 1; AltName: Full=GSTM1-1	_	GST, gst	PF14497.3|GST_C_3|Glutathione S-transferase, C-terminal domain|m.31534:106-201;PF02798.17|GST_N|Glutathione S-transferase, N-terminal domain|m.31534:5-81;PF00043.22|GST_C|Glutathione S-transferase, C-terminal domain|m.31534:121-192;PF13417.3|GST_N_3|Glutathione S-transferase, N-terminal domain|m.31534:15-84
c99930_g1	17.00	3.00	5.279	0.885	-2.45	1.14e-01	1.00e+00	no	down	_	_	_	_	_
c131686_g1	17.00	3.00	1.613	0.279	-2.18	1.14e-01	1.00e+00	no	down	_	_	_	_	_
c103199_g1	17.00	3.00	1.332	0.230	-2.12	1.14e-01	1.00e+00	no	down	hypothetical protein LOTGIDRAFT_238308 [Lottia gigantea]	RecName: Full=von Willebrand factor D and EGF domain-containing protein; Flags: Precursor [Homo sapiens]	_	_	_
c109179_g1	17.00	3.00	10.753	2.885	-1.86	1.14e-01	1.00e+00	no	down	_	_	_	_	_
c55079_g1	17.00	3.00	2.737	0.461	-2.34	1.14e-01	1.00e+00	no	down	hypothetical protein T265_00316 [Opisthorchis viverrini]	_	SJCHGC01867 protein	_	PF00582.23|Usp|Universal stress protein family|m.65552:15-161
c123344_g3	17.00	3.00	1.588	0.121	-2.93	1.14e-01	1.00e+00	no	down	_	_	_	_	_
c122571_g1	50.00	12.00	3.482	1.273	-1.38	1.14e-01	1.00e+00	no	down	hypothetical protein LOTGIDRAFT_71933, partial [Lottia gigantea]	RecName: Full=Excitatory amino acid transporter 1; AltName: Full=Sodium-dependent glutamate/aspartate transporter 1; Short=GLAST-1; AltName: Full=Solute carrier fami	_	SLC1A3, EAAT1	PF00375.15|SDF|Sodium:dicarboxylate symporter family|m.46129:9-202
c111344_g1	4794.00	16469.00	209.235	704.505	1.75	1.15e-01	1.00e+00	no	up	_	_	_	_	_
c126025_g1	604.00	165.00	22.935	6.146	-1.88	1.15e-01	1.00e+00	no	down	hypothetical protein LOTGIDRAFT_234762 [Lottia gigantea]	_	_	_	_
c128405_g1	754.00	206.00	42.864	10.462	-2.02	1.15e-01	1.00e+00	no	down	PREDICTED: putative peroxisomal-coenzyme A synthetase-like isoform X1 [Aplysia californica]	_	_	_	PF00501.25|AMP-binding|AMP-binding enzyme|m.51273:62-373
c130050_g1	314.00	85.00	6.757	1.794	-1.86	1.15e-01	1.00e+00	no	down	Tripartite motif-containing protein 45 [Crassostrea gigas]	_	_	_	PF00386.18|C1q|C1q domain|m.56807:513-617;PF13445.3|zf-RING_UBOX|RING-type zinc-finger|m.56807:18-50
c113655_g1	78.00	20.00	4.313	1.491	-1.47	1.15e-01	1.00e+00	no	down	_	_	_	_	_
c121777_g1	85.00	22.00	2.651	0.679	-1.82	1.16e-01	1.00e+00	no	down	PREDICTED: aquaporin-12-like [Aplysia californica]	_	_	_	PF00230.17|MIP|Major intrinsic protein|m.75296:199-259
c107323_g1	2107.00	7204.00	219.340	728.448	1.73	1.16e-01	1.00e+00	no	up	PREDICTED: caprin-2-like, partial [Aplysia californica]	_	_	_	PF00386.18|C1q|C1q domain|m.48951:31-158
c108129_g2	5.00	24.00	0.257	1.212	1.88	1.16e-01	1.00e+00	no	up	_	_	_	_	_
c113729_g1	5.00	24.00	0.257	1.200	1.86	1.16e-01	1.00e+00	no	up	_	_	_	_	_
c119079_g2	24.00	5.00	1.992	0.400	-2.06	1.16e-01	1.00e+00	no	down	_	_	_	_	_
c97534_g1	24.00	5.00	1.051	0.218	-1.86	1.16e-01	1.00e+00	no	down	_	_	_	_	PF13855.3|LRR_8|Leucine rich repeat|m.42724:178-225;PF13855.3|LRR_8|Leucine rich repeat|m.42724:190-226
c125024_g2	247.00	849.00	4.802	16.342	1.75	1.17e-01	1.00e+00	no	up	_	_	_	_	_
c120316_g1	31.00	7.00	0.745	0.170	-1.65	1.17e-01	1.00e+00	no	down	_	_	_	_	_
c115000_g1	31.00	7.00	1.527	0.339	-1.89	1.17e-01	1.00e+00	no	down	_	_	_	_	_
c54414_g1	31.00	7.00	2.248	0.497	-1.98	1.17e-01	1.00e+00	no	down	_	_	_	_	_
c122439_g3	31.00	7.00	1.576	0.364	-1.85	1.17e-01	1.00e+00	no	down	_	_	_	_	_
c114929_g2	72.00	252.00	2.334	11.844	2.29	1.17e-01	1.00e+00	no	up	_	_	_	_	_
c105904_g1	39.00	9.00	5.511	1.224	-2.08	1.17e-01	1.00e+00	no	down	_	_	_	_	_
c106642_g1	39.00	9.00	3.727	0.837	-2.03	1.17e-01	1.00e+00	no	down	_	_	_	_	_
c109096_g1	38.00	9.00	9.152	2.073	-2.09	1.17e-01	1.00e+00	no	down	_	_	_	_	_
c126966_g1	159.00	42.00	8.187	1.855	-2.08	1.17e-01	1.00e+00	no	down	Multiple epidermal growth factor-like domains 11 [Crassostrea gigas]	RecName: Full=Multiple epidermal growth factor-like domains protein 11; Short=Multiple EGF-like domains protein 11; Flags: Precursor [Homo sapiens]	_	_	_
c115049_g2	60.00	15.00	1.332	0.327	-1.75	1.17e-01	1.00e+00	no	down	_	_	_	_	_
c120536_g2	19.00	72.00	1.002	3.855	1.84	1.17e-01	1.00e+00	no	up	_	_	_	_	_
c90932_g1	670.00	2284.00	17.864	59.816	1.74	1.17e-01	1.00e+00	no	up	_	_	_	_	PF00452.16|Bcl-2|Apoptosis regulator proteins, Bcl-2 family|m.75846:77-172
c101058_g2	840.00	233.00	15.884	4.340	-1.85	1.18e-01	1.00e+00	no	down	PREDICTED: uncharacterized protein LOC102029190 [Chinchilla lanigera]	_	_	_	PF04548.13|AIG1|AIG1 family|m.63968:6-219;PF01926.20|MMR_HSR1|50S ribosome-binding GTPase|m.63968:7-103;PF04548.13|AIG1|AIG1 family|m.63969:21-196;PF01926.20|MMR_HSR1|50S ribosome-binding GTPase|m.63969:21-124
c117388_g3	112.00	30.00	42.534	10.620	-1.99	1.18e-01	1.00e+00	no	down	hypothetical protein LOTGIDRAFT_91761, partial [Lottia gigantea]	_	_	_	PF07679.13|I-set|Immunoglobulin I-set domain|m.50129:23-63
c95107_g1	105.00	28.00	20.063	5.140	-1.94	1.18e-01	1.00e+00	no	down	translationally controlled tumor protein [Clonorchis sinensis]	RecName: Full=Translationally-controlled tumor protein homolog; Short=TCTP	_	_	PF00838.14|TCTP|Translationally controlled tumour protein|m.49282:8-172
c128075_g1	50.00	175.00	1.210	4.134	1.69	1.19e-01	1.00e+00	no	up	Neurotrypsin [Crassostrea gigas]	RecName: Full=Coagulation factor XI; Short=FXI; AltName: Full=Plasma thromboplastin antecedent; Short=PTA; Contains: RecName: Full=Coagulation factor XIa heavy chai	_	PLG	PF00089.23|Trypsin|Trypsin|m.73556:368-611;PF00530.15|SRCR|Scavenger receptor cysteine-rich domain|m.73556:80-166;PF00059.18|Lectin_C|Lectin C-type domain|m.73556:191-274;PF13365.3|Trypsin_2|Trypsin-like peptidase domain|m.73556:401-575
c112499_g3	408.00	112.00	14.247	3.504	-1.99	1.19e-01	1.00e+00	no	down	_	_	_	_	_
c104819_g1	2270.00	7685.00	207.316	683.229	1.72	1.19e-01	1.00e+00	no	up	PREDICTED: kinesin-related protein 1-like [Poecilia formosa]	_	_	_	PF00386.18|C1q|C1q domain|m.10497:79-171
c104985_g1	20.00	75.00	1.356	4.983	1.80	1.19e-01	1.00e+00	no	up	PREDICTED: vegetative cell wall protein gp1-like [Callorhinchus milii]	_	_	_	PF02014.13|Reeler|Reeler domain|m.3922:43-165
c122690_g1	189.00	643.00	3.910	13.081	1.72	1.19e-01	1.00e+00	no	up	hypothetical protein LOTGIDRAFT_224744 [Lottia gigantea]	RecName: Full=Mitochondrial coenzyme A transporter SLC25A42; AltName: Full=Solute carrier family 25 member 42	Solute carrier family 25 member 42	SLC25A42	PF00153.24|Mito_carr|Mitochondrial carrier protein|m.60030:39-128;PF00153.24|Mito_carr|Mitochondrial carrier protein|m.60030:133-220;PF00153.24|Mito_carr|Mitochondrial carrier protein|m.60030:230-321
c118820_g1	190.00	51.00	7.490	2.546	-1.52	1.19e-01	1.00e+00	no	down	hypothetical protein LOTGIDRAFT_169342 [Lottia gigantea]	_	_	_	PF01697.24|Glyco_transf_92|Glycosyltransferase family 92|m.39219:189-418
c87593_g2	33.00	119.00	2.077	7.322	1.77	1.19e-01	1.00e+00	no	up	hypothetical protein CAPTEDRAFT_225999 [Capitella teleta]	_	_	_	_
c127013_g1	344.00	1166.00	8.920	29.859	1.73	1.19e-01	1.00e+00	no	up	hypothetical protein BRAFLDRAFT_222911 [Branchiostoma floridae]	RecName: Full=C2 domain-containing protein 5; AltName: Full=138 kDa C2 domain-containing phosphoprotein [Xenopus (Silurana) tropicalis]	_	_	PF00168.27|C2|C2 domain|m.58212:19-127;PF04548.13|AIG1|AIG1 family|m.58213:2-195
c123204_g1	116.00	31.00	4.008	1.030	-1.86	1.19e-01	1.00e+00	no	down	_	_	_	_	_
c100120_g1	12.00	47.00	2.016	7.589	1.86	1.20e-01	1.00e+00	no	up	_	_	_	_	_
c120590_g1	49.00	12.00	7.661	1.806	-2.03	1.20e-01	1.00e+00	no	down	_	_	_	_	_
c116151_g1	10.00	40.00	1.002	3.273	1.61	1.20e-01	1.00e+00	no	up	_	_	_	_	_
c132417_g1	42.00	10.00	30.254	6.547	-2.19	1.20e-01	1.00e+00	no	down	hypothetical protein T265_14302, partial [Opisthorchis viverrini]	_	Ribosomal protein smL37a	RP-L37Ae, RPL37A	PF01780.16|Ribosomal_L37ae|Ribosomal L37ae protein family|m.41758:13-96
c119599_g1	119.00	32.00	5.254	1.418	-1.82	1.21e-01	1.00e+00	no	down	hypothetical protein LOTGIDRAFT_164342 [Lottia gigantea]	_	_	_	PF06452.8|CBM9_1|Carbohydrate family 9 binding domain-like|m.16542:112-198
c118702_g1	80.00	21.00	2.175	0.570	-1.76	1.21e-01	1.00e+00	no	down	unnamed protein product [Oikopleura dioica]	_	_	_	PF04488.12|Gly_transf_sug|Glycosyltransferase sugar-binding region containing DXD motif|m.40705:250-288
c126413_g1	6.00	27.00	0.696	3.055	1.99	1.21e-01	1.00e+00	no	up	_	_	_	_	_
c116538_g1	6.00	27.00	0.379	1.770	1.96	1.21e-01	1.00e+00	no	up	_	_	_	_	_
c100425_g1	6.00	27.00	0.391	1.734	1.90	1.21e-01	1.00e+00	no	up	TPA: scavenger receptor class F, member 1 [Bos taurus]	_	_	_	_
c108059_g1	27.00	6.00	2.077	0.461	-1.96	1.21e-01	1.00e+00	no	down	_	_	_	_	_
c101757_g1	27.00	6.00	1.136	0.242	-1.85	1.21e-01	1.00e+00	no	down	_	_	_	_	_
c101406_g1	130.00	441.00	15.102	50.881	1.75	1.21e-01	1.00e+00	no	up	_	_	_	_	_
c99807_g1	4.00	20.00	0.464	2.231	2.05	1.22e-01	1.00e+00	no	up	_	_	_	_	_
c125143_g2	4.00	20.00	0.403	2.122	2.14	1.22e-01	1.00e+00	no	up	_	_	_	_	_
c112821_g1	4.00	20.00	0.232	1.334	2.11	1.22e-01	1.00e+00	no	up	_	_	_	_	_
c110091_g1	4.00	20.00	0.257	1.237	1.91	1.22e-01	1.00e+00	no	up	_	_	_	_	_
c113191_g2	20.00	4.00	2.089	0.400	-2.13	1.22e-01	1.00e+00	no	down	_	_	_	_	_
c111075_g3	20.00	4.00	1.478	0.291	-2.01	1.22e-01	1.00e+00	no	down	_	_	_	_	_
c102277_g1	20.00	4.00	1.503	0.291	-2.04	1.22e-01	1.00e+00	no	down	_	_	_	_	_
c123360_g1	20.00	4.00	1.808	0.449	-1.80	1.22e-01	1.00e+00	no	down	_	_	_	_	_
c9198_g1	20.00	4.00	1.039	0.206	-1.90	1.22e-01	1.00e+00	no	down	_	_	_	_	_
c107580_g1	1572.00	444.00	77.675	21.482	-1.85	1.22e-01	1.00e+00	no	down	PREDICTED: protein diaphanous homolog 1 [Peromyscus maniculatus bairdii]	RecName: Full=Cytokinesis protein sepA; AltName: Full=Forced expression inhibition of growth A; AltName: Full=Protein FH1/2 [Aspergillus nidulans FGSC A4]	_	BNI1	_
c114496_g1	346.00	1160.00	147.041	223.092	0.60	1.22e-01	1.00e+00	no	up	_	_	_	_	_
c98171_g1	76.00	20.00	6.549	1.709	-1.88	1.23e-01	1.00e+00	no	down	_	_	_	_	_
c101568_g1	42.00	145.00	3.042	10.317	1.73	1.23e-01	1.00e+00	no	up	_	_	_	_	_
c113860_g1	87.00	297.00	1.503	5.031	1.68	1.23e-01	1.00e+00	no	up	hypothetical protein CGI_10009834 [Crassostrea gigas]	_	_	_	_
c124615_g1	461.00	129.00	12.610	3.722	-1.73	1.23e-01	1.00e+00	no	down	_	_	_	_	_
c98992_g1	118.00	32.00	8.297	2.194	-1.87	1.23e-01	1.00e+00	no	down	hypothetical protein T265_00531 [Opisthorchis viverrini]	_	SJCHGC09365 protein	NAP1L1, NRP	PF00956.15|NAP|Nucleosome assembly protein (NAP)|m.42570:28-222
c106955_g1	11.00	43.00	0.525	2.012	1.76	1.23e-01	1.00e+00	no	up	_	_	_	_	_
c106691_g2	11.00	43.00	0.464	1.782	1.74	1.23e-01	1.00e+00	no	up	_	_	_	_	_
c127224_g1	11.00	43.00	1.332	5.031	1.84	1.23e-01	1.00e+00	no	up	_	_	_	_	_
c153174_g1	45.00	11.00	1.466	0.352	-1.79	1.23e-01	1.00e+00	no	down	protein KINase [Schistosoma japonicum]	_	Protein KINase (EC 2.7.11.1) Putative uncharacterized protein	CSNK1A	PF00069.22|Pkinase|Protein kinase domain|m.69491:2-118;PF07714.14|Pkinase_Tyr|Protein tyrosine kinase|m.69491:8-131
c117567_g1	43.00	148.00	2.077	6.995	1.70	1.23e-01	1.00e+00	no	up	_	_	_	_	_
c119047_g1	775.00	219.00	19.000	6.583	-1.52	1.24e-01	1.00e+00	no	down	_	_	_	_	_
c116986_g1	169.00	46.00	2.236	0.594	-1.75	1.24e-01	1.00e+00	no	down	collagen type I/II/III/V/XI alpha [Clonorchis sinensis]	RecName: Full=Collagen alpha-1(I) chain; AltName: Full=Alpha-1 type I collagen; Flags: Precursor [Canis lupus familiaris]	_	COL1A	PF01391.15|Collagen|Collagen triple helix repeat (20 copies)|m.19003:62-120;PF01391.15|Collagen|Collagen triple helix repeat (20 copies)|m.19003:596-654;PF01391.15|Collagen|Collagen triple helix repeat (20 copies)|m.19003:670-727;PF01391.15|Collagen|Collagen triple helix repeat (20 copies)|m.19003:1021-1078;PF01410.15|COLFI|Fibrillar collagen C-terminal domain|m.19003:1110-1299
c128561_g1	422.00	1406.00	8.944	29.314	1.70	1.24e-01	1.00e+00	no	up	PREDICTED: uncharacterized protein LOC101863175 [Aplysia californica]	RecName: Full=Uromodulin; AltName: Full=Tamm-Horsfall urinary glycoprotein; Short=THP; Contains: RecName: Full=Uromodulin, secreted form; Flags: Precursor [Homo sapie	_	_	PF00094.22|VWD|von Willebrand factor type D domain|m.31440:401-559;PF07974.10|EGF_2|EGF-like domain|m.31440:778-804
c12833_g1	37.00	9.00	2.810	0.667	-1.92	1.24e-01	1.00e+00	no	down	_	_	_	_	PF00001.18|7tm_1|7 transmembrane receptor (rhodopsin family)|m.51598:24-254
c121214_g1	14.00	53.00	0.843	3.116	1.77	1.25e-01	1.00e+00	no	up	_	_	_	_	_
c116703_g1	14.00	53.00	0.464	1.721	1.69	1.25e-01	1.00e+00	no	up	PREDICTED: E3 ubiquitin-protein ligase TRIM56 [Python bivittatus]	_	_	NEURL4	PF13445.3|zf-RING_UBOX|RING-type zinc-finger|m.34167:15-50;PF00097.22|zf-C3HC4|Zinc finger, C3HC4 type (RING finger)|m.34167:15-52;PF00643.21|zf-B_box|B-box zinc finger|m.34167:148-180;PF13923.3|zf-C3HC4_2|Zinc finger, C3HC4 type (RING finger)|m.34167:15-52;PF13920.3|zf-C3HC4_3|Zinc finger, C3HC4 type (RING finger)|m.34167:13-56;PF14447.3|Prok-RING_4|Prokaryotic RING finger family 4|m.34167:15-56
c111105_g1	14.00	53.00	0.342	1.297	1.66	1.25e-01	1.00e+00	no	up	PREDICTED: uncharacterized protein LOC101850279 [Aplysia californica]	_	_	_	PF00002.21|7tm_2|7 transmembrane receptor (Secretin family)|m.31590:285-472
c107989_g1	196.00	654.00	10.484	34.260	1.70	1.25e-01	1.00e+00	no	up	hypothetical protein LOTGIDRAFT_174500 [Lottia gigantea]	_	_	_	_
c123364_g1	99.00	27.00	5.376	1.443	-1.83	1.26e-01	1.00e+00	no	down	_	_	_	_	_
c110466_g2	7.00	30.00	0.257	1.055	1.69	1.26e-01	1.00e+00	no	up	_	_	_	_	PF01582.17|TIR|TIR domain|m.68934:400-507
c113366_g1	7.00	30.00	0.269	1.152	1.76	1.26e-01	1.00e+00	no	up	_	_	_	_	_
c128804_g3	30.00	7.00	2.493	0.570	-1.95	1.26e-01	1.00e+00	no	down	_	_	_	_	_
c118477_g1	30.00	7.00	11.608	2.413	-2.22	1.26e-01	1.00e+00	no	down	_	_	_	_	_
c131355_g1	30.00	7.00	2.627	0.594	-1.97	1.26e-01	1.00e+00	no	down	plastin-2 [Clonorchis sinensis]	RecName: Full=Plastin-1 [Mus musculus]	_	PLS1	PF00307.28|CH|Calponin homology (CH) domain|m.30505:121-238
c105777_g2	30.00	7.00	0.880	0.206	-1.68	1.26e-01	1.00e+00	no	down	_	_	_	_	_
c125781_g2	30.00	7.00	0.782	0.182	-1.65	1.26e-01	1.00e+00	no	down	_	_	_	_	_
c70333_g1	30.00	7.00	4.020	0.909	-2.03	1.26e-01	1.00e+00	no	down	_	_	_	_	_
c111694_g1	12.00	46.00	1.063	3.079	1.45	1.26e-01	1.00e+00	no	up	PREDICTED: deoxynucleoside triphosphate triphosphohydrolase SAMHD1-like, partial [Saccoglossus kowalevskii]	RecName: Full=Deoxynucleoside triphosphate triphosphohydrolase SAMHD1; Short=dNTPase	_	_	PF01966.19|HD|HD domain|m.11686:130-287
c117817_g1	12.00	46.00	1.051	3.225	1.53	1.26e-01	1.00e+00	no	up	Endothelial cells scavenger receptor [Crassostrea gigas]	RecName: Full=Scavenger receptor class F member 2; AltName: Full=SRECRP-1; AltName: Full=Scavenger receptor expressed by endothelial cells 2 protein; Short=SREC-I	_	_	PF13957.3|YafO_toxin|Toxin YafO, type II toxin-antitoxin system|m.58614:85-119
c129724_g1	554.00	1833.00	12.524	33.206	1.40	1.26e-01	1.00e+00	no	up	hypothetical protein BRAFLDRAFT_74384 [Branchiostoma floridae]	RecName: Full=Ceruloplasmin; AltName: Full=Ferroxidase; Flags: Precursor [Ovis aries]	_	CP	PF07732.12|Cu-oxidase_3|Multicopper oxidase|m.26636:97-205;PF07732.12|Cu-oxidase_3|Multicopper oxidase|m.26636:860-932;PF07731.11|Cu-oxidase_2|Multicopper oxidase|m.26636:1017-1120
c129426_g2	655.00	186.00	10.398	2.849	-1.83	1.26e-01	1.00e+00	no	down	_	_	_	_	PF07686.14|V-set|Immunoglobulin V-set domain|m.19843:30-117
c109079_g1	174.00	48.00	23.656	6.559	-1.83	1.27e-01	1.00e+00	no	down	_	_	_	_	PF00431.17|CUB|CUB domain|m.48401:54-134
c120673_g3	23.00	83.00	2.016	7.201	1.79	1.27e-01	1.00e+00	no	up	PREDICTED: LOW QUALITY PROTEIN: general transcription factor II-I repeat domain-containing protein 2B-like [Chrysemys picta bellii]	_	_	_	_
c98668_g1	113.00	31.00	14.296	3.795	-1.89	1.27e-01	1.00e+00	no	down	hypothetical protein BRAFLDRAFT_67516 [Branchiostoma floridae]	RecName: Full=Tenascin-N; Short=TN-N; Flags: Precursor [Mus musculus]	_	ANGPT2	PF00147.15|Fibrinogen_C|Fibrinogen beta and gamma chains, C-terminal globular domain|m.26639:1-143
c125323_g1	497.00	1638.00	10.423	33.775	1.69	1.27e-01	1.00e+00	no	up	PREDICTED: uncharacterized protein LOC101862922 [Aplysia californica]	RecName: Full=Nose resistant to fluoxetine protein 6; Short=Protein nrf-6; Flags: Precursor [Caenorhabditis elegans]	_	_	PF01757.19|Acyl_transf_3|Acyltransferase family|m.29302:337-719
c109848_g1	10.00	39.00	0.415	1.625	1.74	1.27e-01	1.00e+00	no	up	_	_	_	_	_
c113703_g1	41.00	10.00	14.223	3.504	-1.99	1.27e-01	1.00e+00	no	down	_	_	_	_	_
c105031_g2	41.00	10.00	2.199	0.521	-1.89	1.27e-01	1.00e+00	no	down	_	_	_	_	_
c39530_g1	41.00	10.00	4.228	1.006	-1.97	1.27e-01	1.00e+00	no	down	predicted protein [Nematostella predicted protein [Nematostella vectensis]	RecName: Full=Ras-like GTP-binding protein RHO; Flags: Precursor	hypothetical protein	RHOA	PF00071.19|Ras|Ras family|m.60119:17-189;PF08477.10|Roc|Ras of Complex, Roc, domain of DAPkinase|m.60119:17-130;PF00025.18|Arf|ADP-ribosylation factor family|m.60119:16-182
c129351_g1	297.00	84.00	5.828	1.625	-1.78	1.27e-01	1.00e+00	no	down	_	_	_	_	_
c1582_g1	5.00	23.00	0.379	1.721	1.93	1.28e-01	1.00e+00	no	up	_	_	_	_	_
c126368_g3	5.00	23.00	0.696	3.116	2.01	1.28e-01	1.00e+00	no	up	_	_	_	_	_
c67244_g1	23.00	5.00	49.315	9.141	-2.42	1.28e-01	1.00e+00	no	down	SJCHGC01650 protein [Schistosoma ribosomal protein L38 [Schistosoma japonicum]	_	SJCHGC01650 protein	RP-L38e, RPL38	_
c90509_g1	23.00	5.00	2.089	0.449	-2.00	1.28e-01	1.00e+00	no	down	GNAT family acetyltransferase [Acinetobacter junii]	_	_	_	PF13673.4|Acetyltransf_10|Acetyltransferase (GNAT) domain|m.39658:77-153;PF00583.22|Acetyltransf_1|Acetyltransferase (GNAT) family|m.39658:77-148;PF13508.4|Acetyltransf_7|Acetyltransferase (GNAT) domain|m.39658:94-148
c111220_g1	23.00	5.00	3.104	0.655	-2.09	1.28e-01	1.00e+00	no	down	_	_	_	_	_
c120842_g5	23.00	5.00	3.091	0.655	-2.08	1.28e-01	1.00e+00	no	down	_	_	_	_	_
c108015_g1	23.00	5.00	1.197	0.255	-1.87	1.28e-01	1.00e+00	no	down	_	_	_	_	_
c93261_g1	23.00	5.00	1.442	0.303	-1.94	1.28e-01	1.00e+00	no	down	_	_	_	_	_
c100139_g1	23.00	5.00	1.026	0.218	-1.82	1.28e-01	1.00e+00	no	down	_	_	_	_	_
c109541_g1	51.00	13.00	2.981	0.740	-1.87	1.28e-01	1.00e+00	no	down	_	_	_	_	_
c124136_g5	88.00	24.00	13.013	3.431	-1.89	1.28e-01	1.00e+00	no	down	_	_	_	_	_
c115131_g2	27.00	96.00	0.513	1.806	1.64	1.29e-01	1.00e+00	no	up	PREDICTED: von Willebrand factor D and EGF domain-containing protein-like [Saccoglossus kowalevskii]	_	_	_	PF00094.22|VWD|von Willebrand factor type D domain|m.21025:399-560
c103203_g1	16.00	59.00	1.356	4.813	1.75	1.29e-01	1.00e+00	no	up	hypothetical protein LOTGIDRAFT_210379 [Lottia gigantea]	RecName: Full=Dynein heavy chain 1, axonemal; AltName: Full=Axonemal beta dynein heavy chain 1; AltName: Full=Ciliary dynein heavy chain 1; AltName: Full=Heat shoc	_	DNAH	PF03028.12|Dynein_heavy|Dynein heavy chain and region D6 of dynein motor|m.25736:1-206
c125581_g1	45.00	152.00	5.999	19.615	1.69	1.29e-01	1.00e+00	no	up	_	_	_	_	_
c126440_g1	25.00	89.00	0.513	1.806	1.64	1.29e-01	1.00e+00	no	up	_	_	_	_	_
c104825_g1	580.00	167.00	95.026	26.368	-1.85	1.30e-01	1.00e+00	no	down	_	_	_	_	_
c122444_g1	142.00	39.00	6.977	1.879	-1.84	1.30e-01	1.00e+00	no	down	hypothetical protein LOTGIDRAFT_160121 [Lottia gigantea]	_	_	_	_
c71599_g1	152.00	42.00	46.419	12.135	-1.93	1.30e-01	1.00e+00	no	down	hypothetical protein T265_05779 [Opisthorchis viverrini]	RecName: Full=60S acidic ribosomal protein P1; AltName: Full=L12 [Zea mays]	hypothetical protein	RP-LP1, RPLP1	PF00428.16|Ribosomal_60s|60s Acidic ribosomal protein|m.33530:43-134
c78422_g1	162.00	45.00	8.920	2.425	-1.84	1.30e-01	1.00e+00	no	down	hypothetical protein T265_07589 [Opisthorchis viverrini]	RecName: Full=Glyceraldehyde-3-phosphate dehydrogenase; Short=GAPDH; AltName: Full=Major larval surface antigen; AltName: Full=P-37 [Schistosoma mansoni]	Glyceraldehyde-3-phosphate dehydrogenase (EC 1.2.1.12)	GAPDH, gapA	PF02800.17|Gp_dh_C|Glyceraldehyde 3-phosphate dehydrogenase, C-terminal domain|m.20652:157-314;PF00044.21|Gp_dh_N|Glyceraldehyde 3-phosphate dehydrogenase, NAD binding domain|m.20652:5-152
c109296_g1	180.00	593.00	12.341	39.813	1.68	1.30e-01	1.00e+00	no	up	_	_	_	_	_
c129516_g1	543.00	1773.00	19.012	53.233	1.48	1.30e-01	1.00e+00	no	up	PREDICTED: GTPase IMAP family member 8-like [Pundamilia nyererei]	RecName: Full=GTPase IMAP family member 4; AltName: Full=Immunity-associated nucleotide 1 protein; Short=IAN-1; Short=hIAN1; AltName: Full=Immunity-associated prot	_	_	PF04548.13|AIG1|AIG1 family|m.11570:32-229;PF01926.20|MMR_HSR1|50S ribosome-binding GTPase|m.11570:33-154;PF04670.9|Gtr1_RagA|Gtr1/RagA G protein conserved region|m.11570:32-184
c123504_g7	74.00	20.00	8.773	2.303	-1.88	1.30e-01	1.00e+00	no	down	_	_	_	_	_
c124263_g1	37.00	124.00	1.039	3.346	1.60	1.32e-01	1.00e+00	no	up	_	_	_	_	_
c112116_g1	158.00	518.00	17.876	56.894	1.66	1.32e-01	1.00e+00	no	up	PREDICTED: collagen alpha-1(XII) chain-like [Aplysia californica]	_	_	_	PF00092.25|VWA|von Willebrand factor type A domain|m.44111:138-244;PF13519.3|VWA_2|von Willebrand factor type A domain|m.44111:141-242
c110860_g1	81.00	268.00	4.851	11.081	1.18	1.32e-01	1.00e+00	no	up	_	_	_	_	_
c119697_g1	6.00	26.00	0.257	1.091	1.74	1.32e-01	1.00e+00	no	up	_	_	_	_	_
c103275_g1	6.00	26.00	1.417	5.868	1.98	1.32e-01	1.00e+00	no	up	_	_	_	_	_
c126084_g3	47.00	12.00	5.938	2.364	-1.29	1.32e-01	1.00e+00	no	down	PREDICTED: uncharacterized protein LOC101855176 [Aplysia californica]	RecName: Full=Fibulin-1; Short=FIBL-1; Flags: Precursor [Gallus gallus]	_	NID	PF07645.12|EGF_CA|Calcium-binding EGF domain|m.22405:31-70;PF07645.12|EGF_CA|Calcium-binding EGF domain|m.22405:117-151;PF00053.21|Laminin_EGF|Laminin EGF domain|m.22405:1-41;PF00053.21|Laminin_EGF|Laminin EGF domain|m.22405:87-126;PF12661.4|hEGF|Human growth factor-like EGF|m.22405:16-28;PF12661.4|hEGF|Human growth factor-like EGF|m.22405:103-114
c103710_g2	36.00	9.00	1.564	0.388	-1.77	1.32e-01	1.00e+00	no	down	_	_	_	_	_
c108020_g2	36.00	9.00	4.411	1.067	-1.95	1.32e-01	1.00e+00	no	down	_	_	_	_	_
c129414_g1	366.00	106.00	10.313	2.934	-1.78	1.33e-01	1.00e+00	no	down	hypothetical protein LOTGIDRAFT_159528 [Lottia gigantea]	_	_	_	PF03067.12|LPMO_10|Lytic polysaccharide mono-oxygenase, cellulose-degrading|m.26180:45-239
c94003_g1	80.00	22.00	21.786	5.686	-1.92	1.33e-01	1.00e+00	no	down	SJCHGC06232 protein [Schistosoma Ribosomal protein S19a [Schistosoma japonicum]	RecName: Full=40S ribosomal protein S19a [Drosophila melanogaster]	SJCHGC06232 protein	RP-S19e, RPS19	PF01090.16|Ribosomal_S19e|Ribosomal protein S19e|m.71241:13-146
c118975_g2	408.00	118.00	22.299	6.316	-1.80	1.33e-01	1.00e+00	no	down	_	_	_	_	_
c121996_g3	40.00	10.00	4.093	0.994	-1.94	1.35e-01	1.00e+00	no	down	hypothetical protein BRAFLDRAFT_221767 [Branchiostoma floridae]	RecName: Full=Tenascin-R; Short=TN-R; AltName: Full=Janusin; AltName: Full=Neural recognition molecule J1-160/180; AltName: Full=Restrictin; Flags: Precursor [Rattus	_	PRSS12	_
c60248_g1	40.00	10.00	6.427	1.552	-1.98	1.35e-01	1.00e+00	no	down	hypothetical protein T265_11086 [Opisthorchis viverrini]	_	SJCHGC02867 protein	CFL	PF00241.17|Cofilin_ADF|Cofilin/tropomyosin-type actin-binding protein|m.9855:17-139
c119165_g3	40.00	10.00	2.810	0.412	-2.51	1.35e-01	1.00e+00	no	down	_	_	_	_	_
c117307_g1	17.00	61.00	0.990	3.467	1.71	1.35e-01	1.00e+00	no	up	_	_	_	_	_
c130655_g1	1587.00	5079.00	15.982	90.609	2.50	1.35e-01	1.00e+00	no	up	_	_	_	_	_
c116671_g1	7.00	29.00	0.696	2.825	1.88	1.35e-01	1.00e+00	no	up	_	_	_	_	_
c33212_g1	7.00	29.00	0.464	1.879	1.81	1.35e-01	1.00e+00	no	up	_	_	_	_	_
c102083_g1	50.00	165.00	4.350	13.457	1.61	1.36e-01	1.00e+00	no	up	_	_	_	_	_
c117228_g1	35.00	119.00	6.183	18.997	1.60	1.36e-01	1.00e+00	no	up	_	_	_	_	_
c112381_g2	53.00	14.00	7.453	1.903	-1.91	1.36e-01	1.00e+00	no	down	_	_	_	_	_
c122604_g1	53.00	14.00	1.576	0.412	-1.71	1.36e-01	1.00e+00	no	down	_	_	_	_	_
c106180_g1	4.00	19.00	0.159	0.752	1.72	1.36e-01	1.00e+00	no	up	_	_	_	_	_
c108813_g1	4.00	19.00	1.808	7.747	2.04	1.36e-01	1.00e+00	no	up	PREDICTED: general transcription factor II-I repeat domain-containing protein 2-like [Poecilia formosa]	_	annotation not avaliable	_	_
c119668_g1	19.00	4.00	11.217	2.170	-2.32	1.36e-01	1.00e+00	no	down	_	_	_	_	_
c9662_g1	19.00	4.00	15.750	2.994	-2.36	1.36e-01	1.00e+00	no	down	huntingtin-interacting protein K [Clonorchis sinensis]	RecName: Full=Huntingtin-interacting protein K; AltName: Full=Huntingtin yeast partner K [Mus musculus]	SJCHGC06646 protein	_	_
c100165_g1	19.00	4.00	1.112	0.230	-1.88	1.36e-01	1.00e+00	no	down	PREDICTED: cubilin-like, partial [Xiphophorus maculatus]	RecName: Full=Cubilin; AltName: Full=460 kDa receptor; AltName: Full=Intestinal intrinsic factor receptor; AltName: Full=Intrinsic factor-cobalamin receptor; AltNa	_	CUBN	PF00431.17|CUB|CUB domain|m.1300:23-83;PF00431.17|CUB|CUB domain|m.1300:95-198;PF00431.17|CUB|CUB domain|m.1300:207-317;PF00431.17|CUB|CUB domain|m.1300:323-385
c98009_g1	19.00	4.00	1.931	0.449	-1.89	1.36e-01	1.00e+00	no	down	_	_	_	_	_
c123280_g2	19.00	4.00	2.114	0.436	-2.05	1.36e-01	1.00e+00	no	down	_	_	_	_	_
c102998_g1	19.00	4.00	1.051	0.218	-1.86	1.36e-01	1.00e+00	no	down	_	_	_	_	_
c127069_g2	215.00	691.00	5.743	18.136	1.64	1.37e-01	1.00e+00	no	up	hypothetical protein LOTGIDRAFT_152975 [Lottia gigantea]	RecName: Full=ADAM family mig-17; AltName: Full=A disintegrin and metalloproteinase mig-17; AltName: Full=Abnormal cell migration protein 17; Flags: Precursor [Cae	_	ADAMTS7	PF01421.16|Reprolysin|Reprolysin (M12B) family zinc metalloprotease|m.1350:243-451;PF13582.3|Reprolysin_3|Metallo-peptidase family M12B Reprolysin-like|m.1350:246-391;PF13688.3|Reprolysin_5|Metallo-peptidase family M12|m.1350:211-408;PF13574.3|Reprolysin_2|Metallo-peptidase family M12B Reprolysin-like|m.1350:248-429;PF13583.3|Reprolysin_4|Metallo-peptidase family M12B Reprolysin-like|m.1350:343-4…
c116678_g5	11.00	41.00	0.745	2.728	1.74	1.37e-01	1.00e+00	no	up	_	_	_	_	_
c97825_g1	43.00	11.00	2.077	0.521	-1.81	1.37e-01	1.00e+00	no	down	hypothetical protein T265_12601, partial [Opisthorchis viverrini]	RecName: Full=Probable protein disulfide-isomerase ER-60; AltName: Full=ERP60; Flags: Precursor [Schistosoma mansoni]	_	PDIA3, GRP58	PF00085.17|Thioredoxin|Thioredoxin|m.29372:1-82;PF00085.17|Thioredoxin|Thioredoxin|m.29372:324-426;PF13848.3|Thioredoxin_6|Thioredoxin-like domain|m.29372:118-298
c121084_g7	43.00	11.00	11.987	2.825	-2.05	1.37e-01	1.00e+00	no	down	_	_	_	_	_
c115077_g2	43.00	11.00	29.313	6.837	-2.08	1.37e-01	1.00e+00	no	down	_	_	_	_	_
c73210_g1	92.00	26.00	30.180	8.038	-1.90	1.37e-01	1.00e+00	no	down	hypothetical protein T265_04276 [Opisthorchis viverrini]	_	SJCHGC00723 protein	RP-S17e, RPS17	PF00833.15|Ribosomal_S17e|Ribosomal S17|m.38522:1-118
c79152_g1	105.00	30.00	16.080	4.437	-1.83	1.37e-01	1.00e+00	no	down	_	_	_	_	_
c129677_g2	56.00	15.00	1.992	1.055	-0.86	1.37e-01	1.00e+00	no	down	PREDICTED: GTPase IMAP family member 4-like [Astyanax mexicanus]	_	_	_	PF04548.13|AIG1|AIG1 family|m.13561:110-316;PF01926.20|MMR_HSR1|50S ribosome-binding GTPase|m.13561:110-232
c92938_g1	69.00	19.00	4.118	1.103	-1.81	1.38e-01	1.00e+00	no	down	_	_	_	_	_
c107229_g1	47.00	154.00	6.610	20.937	1.65	1.38e-01	1.00e+00	no	up	Cadherin-related tumor suppressor [Cerapachys biroi]	RecName: Full=Protocadherin-16; AltName: Full=Protein Dchs1; AltName: Full=Protein dachsous homolog 1; Flags: Precursor [Mus musculus]	_	DCHS1_2, PCDH16_23	_
c91347_g1	8763.00	2617.00	1074.166	310.900	-1.79	1.38e-01	1.00e+00	no	down	_	_	_	_	_
c123537_g1	35.00	118.00	1.906	7.262	1.88	1.38e-01	1.00e+00	no	up	_	_	_	_	_
c126615_g4	32.00	8.00	2.480	0.606	-1.87	1.38e-01	1.00e+00	no	down	_	_	_	_	_
c116928_g3	32.00	8.00	2.285	0.558	-1.86	1.38e-01	1.00e+00	no	down	_	_	_	_	_
c119175_g1	673.00	2137.00	45.148	140.060	1.63	1.38e-01	1.00e+00	no	up	Caprin-2 [Crassostrea gigas]	_	_	_	PF00386.18|C1q|C1q domain|m.6595:126-253
c126159_g1	214.00	62.00	13.477	3.916	-1.76	1.39e-01	1.00e+00	no	down	pannexin 2 [Aplysia californica]	_	_	_	PF00876.15|Innexin|Innexin|m.36893:28-298
c63596_g1	12.00	44.00	83.295	244.925	1.55	1.39e-01	1.00e+00	no	up	_	_	_	_	_
c115179_g2	46.00	12.00	0.941	0.242	-1.61	1.39e-01	1.00e+00	no	down	hypothetical protein LOTGIDRAFT_233093 [Lottia gigantea]	_	_	_	_
c96498_g1	59.00	16.00	2.419	0.643	-1.76	1.39e-01	1.00e+00	no	down	hypothetical protein T265_13906, partial [Opisthorchis viverrini]	_	hypothetical protein	CCT3, TRIC5	PF00118.21|Cpn60_TCP1|TCP-1/cpn60 chaperonin family|m.68758:31-511
c120601_g2	37.00	121.00	1.723	5.552	1.63	1.39e-01	1.00e+00	no	up	_	_	_	_	_
c101593_g1	98.00	28.00	1.723	0.461	-1.70	1.39e-01	1.00e+00	no	down	_	_	_	_	_
c127599_g5	24.00	83.00	1.246	4.231	1.69	1.39e-01	1.00e+00	no	up	_	_	_	_	_
c104937_g1	74.00	240.00	7.698	23.277	1.58	1.39e-01	1.00e+00	no	up	_	_	_	_	PF15633.3|Tox-ART-HYD1|HYD1 signature containing ADP-ribosyltransferase|m.39629:34-90
c128428_g1	194.00	56.00	4.949	1.418	-1.73	1.39e-01	1.00e+00	no	down	_	_	_	_	PF00011.18|HSP20|Hsp20/alpha crystallin family|m.76402:186-258;PF00011.18|HSP20|Hsp20/alpha crystallin family|m.76402:584-658
c117982_g1	1625.00	5136.00	46.615	144.315	1.63	1.39e-01	1.00e+00	no	up	hypothetical protein LOTGIDRAFT_182669 [Lottia gigantea]	RecName: Full=Arylsulfatase I; Short=ASI; Flags: Precursor	_	ARSI_J	PF00884.20|Sulfatase|Sulfatase|m.76486:28-339;PF01663.19|Phosphodiest|Type I phosphodiesterase / nucleotide pyrophosphatase|m.76486:31-279
c122462_g2	443.00	131.00	14.614	15.263	0.06	1.40e-01	1.00e+00	no	up	_	_	_	_	_
c112341_g2	101.00	29.00	6.806	1.915	-1.78	1.40e-01	1.00e+00	no	down	_	_	_	_	_
c125293_g1	1536.00	460.00	27.749	8.498	-1.70	1.40e-01	1.00e+00	no	down	_	_	_	_	_
c128912_g3	200.00	58.00	13.819	3.867	-1.81	1.40e-01	1.00e+00	no	down	_	_	_	_	_
c119960_g1	13.00	47.00	0.489	1.734	1.64	1.40e-01	1.00e+00	no	up	PREDICTED: uncharacterized protein LOC586954 [Strongylocentrotus purpuratus]	_	_	_	_
c122701_g1	49.00	13.00	2.957	0.764	-1.82	1.40e-01	1.00e+00	no	down	_	_	_	_	_
c104346_g1	5.00	22.00	0.538	2.279	1.90	1.41e-01	1.00e+00	no	up	_	_	_	_	_
c125286_g5	5.00	22.00	0.550	2.352	1.92	1.41e-01	1.00e+00	no	up	_	_	_	_	_
c98361_g1	5.00	22.00	0.269	1.164	1.78	1.41e-01	1.00e+00	no	up	_	_	_	_	_
c129255_g3	5.00	22.00	0.367	1.564	1.83	1.41e-01	1.00e+00	no	up	_	_	_	_	_
c70334_g2	22.00	5.00	0.587	0.133	-1.56	1.41e-01	1.00e+00	no	down	_	_	_	_	_
c96214_g1	22.00	5.00	1.259	0.279	-1.84	1.41e-01	1.00e+00	no	down	alpha crystallin-containing small heat shock protein variant NtermFhHSP35a [Fasciola hepatica]	_	_	_	PF00011.18|HSP20|Hsp20/alpha crystallin family|m.62359:164-244;PF00011.18|HSP20|Hsp20/alpha crystallin family|m.62359:298-370
c49277_g1	22.00	5.00	1.674	0.376	-1.90	1.41e-01	1.00e+00	no	down	hypothetical protein T265_11082 [Opisthorchis viverrini]	_	_	_	_
c119708_g1	22.00	5.00	1.014	0.230	-1.76	1.41e-01	1.00e+00	no	down	_	_	_	_	_
c129141_g4	22.00	5.00	3.433	0.752	-2.05	1.41e-01	1.00e+00	no	down	_	_	_	_	_
c125303_g3	22.00	5.00	1.625	0.352	-1.93	1.41e-01	1.00e+00	no	down	_	_	_	_	_
c95038_g1	22.00	5.00	0.855	0.194	-1.70	1.41e-01	1.00e+00	no	down	_	_	_	_	_
c119434_g5	706.00	2225.00	17.510	53.948	1.62	1.41e-01	1.00e+00	no	up	hypothetical protein D910_02711 [Dendroctonus ponderosae]	RecName: Full=Cubilin; Flags: Precursor [Canis lupus familiaris]	_	CUBN	PF00431.17|CUB|CUB domain|m.11079:39-140;PF00431.17|CUB|CUB domain|m.11079:186-284
c112111_g1	9.00	35.00	0.244	0.946	1.60	1.41e-01	1.00e+00	no	up	_	_	_	_	_
c114512_g2	35.00	9.00	4.582	1.140	-1.92	1.41e-01	1.00e+00	no	down	_	_	_	_	_
c130162_g1	35.00	9.00	0.770	0.364	-0.91	1.41e-01	1.00e+00	no	down	_	_	_	_	_
c130520_g1	347.00	103.00	15.652	4.546	-1.76	1.41e-01	1.00e+00	no	down	_	_	_	_	PF00629.20|MAM|MAM domain, meprin/A5/mu|m.39784:239-337
c113747_g1	91.00	26.00	4.545	1.467	-1.57	1.41e-01	1.00e+00	no	down	_	_	_	_	_
c116130_g5	18.00	63.00	1.087	3.722	1.69	1.41e-01	1.00e+00	no	up	_	_	_	_	_
c110677_g1	65.00	18.00	0.904	0.255	-1.50	1.41e-01	1.00e+00	no	down	PREDICTED: probable helicase senataxin [Alligator mississippiensis]	RecName: Full=Probable helicase senataxin; AltName: Full=Amyotrophic lateral sclerosis 4 protein; AltName: Full=SEN1 homolog [Homo sapiens]	_	SETX, ALS4	PF13086.3|AAA_11|AAA domain|m.71230:825-1097;PF13087.3|AAA_12|AAA domain|m.71230:1105-1295;PF13245.3|AAA_19|Part of AAA domain|m.71230:847-898
c77766_g1	65.00	18.00	15.726	4.158	-1.89	1.41e-01	1.00e+00	no	down	_	_	_	_	PF13202.3|EF-hand_5|EF hand|m.4169:41-59
c123292_g1	51.00	165.00	1.405	4.461	1.60	1.42e-01	1.00e+00	no	up	hypothetical protein LOTGIDRAFT_162635 [Lottia gigantea]	RecName: Full=Ferric-chelate reductase 1; AltName: Full=Stromal cell-derived receptor 2; Short=SDR-2 [Mus musculus]	_	_	PF02014.13|Reeler|Reeler domain|m.17170:39-165;PF03351.14|DOMON|DOMON domain|m.17170:226-344;PF03188.13|Cytochrom_B561|Eukaryotic cytochrome b561|m.17170:386-521
c116386_g1	42.00	136.00	6.268	19.894	1.65	1.42e-01	1.00e+00	no	up	_	_	_	_	_
c111845_g2	97.00	28.00	5.181	2.025	-1.31	1.42e-01	1.00e+00	no	down	_	_	_	_	_
c108520_g2	3176.00	9937.00	205.593	628.589	1.61	1.42e-01	1.00e+00	no	up	_	_	_	_	_
c121060_g1	265.00	833.00	11.950	38.564	1.68	1.43e-01	1.00e+00	no	up	PREDICTED: short-chain collagen C4-like [Strongylocentrotus purpuratus]	_	_	_	_
c86251_g1	20.00	69.00	3.165	10.535	1.70	1.43e-01	1.00e+00	no	up	_	_	_	_	_
c112259_g3	6.00	25.00	0.770	3.104	1.88	1.44e-01	1.00e+00	no	up	_	_	_	_	_
c117285_g1	6.00	25.00	0.770	3.116	1.89	1.44e-01	1.00e+00	no	up	_	_	_	_	_
c120544_g2	25.00	6.00	3.165	0.740	-1.96	1.44e-01	1.00e+00	no	down	_	_	_	_	_
c125265_g2	25.00	6.00	3.372	0.788	-1.97	1.44e-01	1.00e+00	no	down	_	_	_	_	_
c85574_g1	25.00	6.00	1.136	0.267	-1.75	1.44e-01	1.00e+00	no	down	hypothetical protein T265_09353 [Opisthorchis viverrini]	RecName: Full=Collagen alpha-1(II) chain; AltName: Full=Alpha-1 type II collagen; Flags: Precursor [Bos taurus]	SJCHGC09298 protein	COL3A	PF01410.15|COLFI|Fibrillar collagen C-terminal domain|m.25367:213-428;PF01391.15|Collagen|Collagen triple helix repeat (20 copies)|m.25367:2-56;PF01391.15|Collagen|Collagen triple helix repeat (20 copies)|m.25367:59-115;PF01391.15|Collagen|Collagen triple helix repeat (20 copies)|m.25367:107-165
c115198_g2	25.00	6.00	6.378	1.455	-2.06	1.44e-01	1.00e+00	no	down	PREDICTED: short-chain collagen C4-like [Strongylocentrotus purpuratus]	_	_	_	_
c124792_g2	25.00	6.00	3.140	0.740	-1.95	1.44e-01	1.00e+00	no	down	_	_	_	_	_
c110770_g1	16.00	56.00	1.039	3.516	1.67	1.44e-01	1.00e+00	no	up	_	_	_	_	_
c80053_g1	58.00	16.00	18.243	4.752	-1.92	1.44e-01	1.00e+00	no	down	large subunit ribosomal protein L22e [Clonorchis sinensis]	_	SJCHGC02419 protein	RP-L22e, RPL22	PF01776.14|Ribosomal_L22e|Ribosomal L22e protein family|m.51190:24-131
c128457_g1	93.00	27.00	10.863	8.547	-0.34	1.45e-01	1.00e+00	no	down	hypothetical protein [Candidatus Amoebophilus asiaticus]	RecName: Full=Ankyrin-1; Short=ANK-1; AltName: Full=Erythrocyte ankyrin [Mus musculus]	_	_	PF12796.4|Ank_2|Ankyrin repeats (3 copies)|m.2822:241-331;PF12796.4|Ank_2|Ankyrin repeats (3 copies)|m.2822:274-365;PF12796.4|Ank_2|Ankyrin repeats (3 copies)|m.2822:335-398;PF12796.4|Ank_2|Ankyrin repeats (3 copies)|m.2822:373-462;PF12796.4|Ank_2|Ankyrin repeats (3 copies)|m.2822:466-529;PF12796.4|Ank_2|Ankyrin repeats (3 copies)|m.2822:533-578;PF13606.3|Ank_3|Ankyrin repeat|m.2822:269-298;PF136…
c105507_g1	129.00	37.00	13.783	3.843	-1.82	1.45e-01	1.00e+00	no	down	_	_	_	_	_
c116286_g1	22.00	75.00	3.519	3.043	-0.20	1.45e-01	1.00e+00	no	down	_	_	_	_	_
c123864_g2	109.00	345.00	3.715	11.541	1.61	1.45e-01	1.00e+00	no	up	Williams-Beuren syndrome chromosomal region 27 protein [Crassostrea gigas]	_	_	_	PF08241.9|Methyltransf_11|Methyltransferase domain|m.29473:84-177;PF13649.3|Methyltransf_25|Methyltransferase domain|m.29473:82-173;PF01209.15|Ubie_methyltran|ubiE/COQ5 methyltransferase family|m.29473:79-178
c117439_g1	12.00	43.00	1.430	4.958	1.73	1.46e-01	1.00e+00	no	up	_	_	_	_	_
c54787_g1	45.00	12.00	13.661	3.443	-1.96	1.46e-01	1.00e+00	no	down	hypothetical protein T265_01682 [Opisthorchis viverrini]	RecName: Full=Nucleoside diphosphate kinase; Short=NDK; Short=NDP kinase; AltName: Full=Abnormal wing disks protein; AltName: Full=Killer of prune protein [Drosophila	Nucleoside diphosphate kinase (EC 2.7.4.6)	ndk, NME	PF00334.16|NDK|Nucleoside diphosphate kinase|m.35190:19-149
c124840_g1	45.00	12.00	2.908	1.431	-0.97	1.46e-01	1.00e+00	no	down	_	_	_	_	_
c120030_g3	2751.00	841.00	75.622	23.277	-1.70	1.46e-01	1.00e+00	no	down	hypothetical protein LOTGIDRAFT_195070 [Lottia gigantea]	RecName: Full=Annexin A11; AltName: Full=56 kDa autoantigen; AltName: Full=Annexin XI; AltName: Full=Annexin-11; AltName: Full=Calcyclin-associated annexin 50; Shor	_	ANXA7_11	PF00191.17|Annexin|Annexin|m.22619:27-91;PF00191.17|Annexin|Annexin|m.22619:98-161;PF00191.17|Annexin|Annexin|m.22619:182-246;PF00191.17|Annexin|Annexin|m.22619:256-321
c102428_g1	7.00	28.00	0.709	2.764	1.82	1.46e-01	1.00e+00	no	up	_	_	_	_	_
c118162_g1	28.00	7.00	1.540	0.570	-1.29	1.46e-01	1.00e+00	no	down	_	_	_	_	_
c115313_g1	28.00	7.00	1.967	0.485	-1.82	1.46e-01	1.00e+00	no	down	_	_	_	_	_
c22100_g1	28.00	7.00	2.639	0.643	-1.88	1.46e-01	1.00e+00	no	down	SJCHGC06192 protein [Schistosoma Eukaryotic translation initiation factor 3 subunit 5 [Schistosoma CAX72	RecName: Full=Eukaryotic translation initiation factor 3 subunit F; Short=eIF3f; AltName: Full=Deubiquitinating enzyme eIF3f; AltName: Full=Eukaryotic translation	Eukaryotic translation initiation factor 3 subunit 5	EIF3F	PF01398.18|JAB|JAB1/Mov34/MPN/PAD-1 ubiquitin protease|m.76016:6-109;PF13012.3|MitMem_reg|Maintenance of mitochondrial structure and function|m.76016:165-272
c108160_g1	28.00	7.00	8.309	1.964	-2.03	1.46e-01	1.00e+00	no	down	_	_	_	_	PF05184.12|SapB_1|Saposin-like type B, region 1|m.2080:51-83
c123058_g2	28.00	7.00	3.018	0.727	-1.91	1.46e-01	1.00e+00	no	down	_	_	_	_	_
c110104_g1	64.00	18.00	2.053	0.570	-1.68	1.46e-01	1.00e+00	no	down	PREDICTED: DUF21 domain-containing protein At1g47330-like [Aplysia californica]	RecName: Full=DUF21 domain-containing protein At4g33700; AltName: Full=CBS domain-containing protein CBSDUF6 [Arabidopsis thaliana]	hypothetical protein	CNNM	PF01595.17|DUF21|Domain of unknown function DUF21|m.3477:58-220
c121721_g1	82.00	259.00	3.397	10.535	1.60	1.46e-01	1.00e+00	no	up	protocadherin-like protein, partial [Stylophora pistillata]	RecName: Full=Protocadherin Fat 1; AltName: Full=Cadherin family member 7; AltName: Full=Cadherin-related tumor suppressor homolog; AltName: Full=Protein fat homol	_	FAT4	PF00028.14|Cadherin|Cadherin domain|m.4841:220-318;PF00028.14|Cadherin|Cadherin domain|m.4841:332-419;PF00028.14|Cadherin|Cadherin domain|m.4841:437-504
c127296_g1	138.00	40.00	11.987	3.382	-1.80	1.47e-01	1.00e+00	no	down	predicted protein [Lodderomyces elongisporus NRRL YB-4239]	RecName: Full=Integumentary mucin C.1; AltName: Full=FIM-C.1	_	_	_
c109928_g1	157.00	46.00	35.202	9.856	-1.83	1.47e-01	1.00e+00	no	down	hypothetical protein T265_15909, partial [Opisthorchis viverrini]	_	_	_	_
c125405_g1	30.00	100.00	2.028	7.407	1.82	1.47e-01	1.00e+00	no	up	_	_	_	_	_
c112545_g1	102.00	30.00	15.530	4.413	-1.79	1.47e-01	1.00e+00	no	down	_	_	_	_	_
c128501_g1	49.00	156.00	1.478	4.655	1.59	1.47e-01	1.00e+00	no	up	_	_	_	_	PF07686.14|V-set|Immunoglobulin V-set domain|m.24323:25-119;PF07679.13|I-set|Immunoglobulin I-set domain|m.24323:184-257;PF13927.3|Ig_3|Immunoglobulin domain|m.24323:178-250;PF00047.22|ig|Immunoglobulin domain|m.24323:26-119
c123911_g2	48.00	13.00	6.623	1.734	-1.87	1.47e-01	1.00e+00	no	down	_	_	_	_	_
c128662_g3	227.00	68.00	11.828	4.328	-1.43	1.48e-01	1.00e+00	no	down	_	_	_	_	PF00100.20|Zona_pellucida|Zona pellucida-like domain|m.60782:38-280
c113044_g1	8.00	31.00	0.550	3.128	2.31	1.48e-01	1.00e+00	no	up	_	_	_	_	_
c129998_g1	14.00	49.00	0.293	0.958	1.43	1.48e-01	1.00e+00	no	up	PREDICTED: sterile alpha motif domain-containing protein 9-like [Latimeria chalumnae]	_	_	_	_
c94198_g1	377.00	114.00	57.392	16.754	-1.77	1.48e-01	1.00e+00	no	down	_	_	_	_	_
c96156_g1	1071.00	3290.00	91.335	273.391	1.58	1.49e-01	1.00e+00	no	up	_	_	_	_	_
c129135_g1	115.00	34.00	3.568	1.600	-1.11	1.49e-01	1.00e+00	no	down	_	_	_	_	_
c110629_g1	306.00	93.00	28.140	8.329	-1.74	1.49e-01	1.00e+00	no	down	_	_	_	_	_
c73145_g1	54.00	15.00	11.461	3.043	-1.88	1.49e-01	1.00e+00	no	down	unknown [Schistosoma japonicum]	RecName: Full=40S ribosomal protein S15; AltName: Full=RIG protein [Sus scrofa]	Ribosomal protein S15 Putative uncharacterized protein	RP-S15e, RPS15	PF00203.18|Ribosomal_S19|Ribosomal protein S19|m.20320:68-149
c93332_g1	34.00	9.00	2.260	0.582	-1.79	1.50e-01	1.00e+00	no	down	_	_	_	_	_
c112775_g4	375.00	1152.00	21.859	65.684	1.58	1.50e-01	1.00e+00	no	up	Endothelin-converting enzyme 1 [Crassostrea gigas]	_	_	_	PF05649.10|Peptidase_M13_N|Peptidase family M13|m.37000:7-307
c68650_g1	213.00	64.00	23.949	6.983	-1.76	1.50e-01	1.00e+00	no	down	60S ribosomal protein L10, putative [Schistosoma mansoni]	_	SJCHGC06675 protein	RP-L10e, RPL10	PF00252.15|Ribosomal_L16|Ribosomal protein L16p/L10e|m.68402:12-165
c106879_g1	16.00	55.00	0.672	2.267	1.62	1.50e-01	1.00e+00	no	up	PREDICTED: uncharacterized protein LOC101863249 isoform X1 [Aplysia californica]	_	_	_	_
c104564_g1	57.00	16.00	13.294	3.564	-1.87	1.50e-01	1.00e+00	no	down	_	_	_	_	_
c115780_g3	311.00	95.00	27.333	8.135	-1.74	1.50e-01	1.00e+00	no	down	_	_	_	_	_
c112775_g2	263.00	807.00	19.110	57.222	1.58	1.51e-01	1.00e+00	no	up	PREDICTED: endothelin-converting enzyme 2-like [Lepisosteus oculatus]	_	_	ECE	PF01431.18|Peptidase_M13|Peptidase family M13|m.66190:2-179
c147803_g1	82.00	24.00	18.548	5.189	-1.82	1.51e-01	1.00e+00	no	down	hypothetical protein T265_11418 [Opisthorchis viverrini]	RecName: Full=40S ribosomal protein S14 [Homo sapiens]	ribosomal protein S14	RP-S14e, RPS14	PF00411.16|Ribosomal_S11|Ribosomal protein S11|m.76903:37-155
c102678_g1	17.00	58.00	1.087	4.413	1.93	1.51e-01	1.00e+00	no	up	_	_	_	_	_
c121432_g5	10.00	37.00	0.709	2.582	1.73	1.51e-01	1.00e+00	no	up	_	_	_	_	_
c127552_g2	38.00	10.00	5.266	1.346	-1.89	1.51e-01	1.00e+00	no	down	_	_	_	_	_
c126974_g8	38.00	10.00	3.104	0.800	-1.83	1.51e-01	1.00e+00	no	down	_	_	_	_	_
c126868_g2	168.00	518.00	9.372	43.122	2.19	1.51e-01	1.00e+00	no	up	_	_	_	_	_
c128161_g2	136.00	40.00	2.871	0.824	-1.68	1.52e-01	1.00e+00	no	down	hypothetical protein LOTGIDRAFT_117302 [Lottia gigantea]	RecName: Full=UDP-glucuronosyltransferase 2B14; Short=UDPGT 2B14; AltName: Full=EGT12; Flags: Precursor	_	UGT	PF00201.15|UDPGT|UDP-glucoronosyl and UDP-glucosyl transferase|m.57314:38-509
c123858_g1	11.00	39.00	1.026	3.540	1.69	1.52e-01	1.00e+00	no	up	PREDICTED: general transcription factor II-I repeat domain-containing protein 2A-like [Heterocephalus glaber]	_	_	_	_
c128712_g3	11.00	39.00	0.709	2.364	1.61	1.52e-01	1.00e+00	no	up	_	_	_	_	_
c114736_g1	37.00	116.00	3.715	12.923	1.77	1.53e-01	1.00e+00	no	up	hypothetical protein LOTGIDRAFT_230366 [Lottia gigantea]	RecName: Full=Estrogen sulfotransferase; AltName: Full=Sulfotransferase 1E1; Short=ST1E1; AltName: Full=Sulfotransferase, estrogen-preferring	_	SULT1E1, STE	PF00685.24|Sulfotransfer_1|Sulfotransferase domain|m.8445:4-107
c63116_g2	202.00	61.00	27.358	7.989	-1.76	1.53e-01	1.00e+00	no	down	_	_	_	_	_
c122010_g5	4.00	18.00	0.305	1.358	1.85	1.53e-01	1.00e+00	no	up	_	_	_	_	_
c126313_g2	4.00	18.00	0.477	2.097	1.93	1.53e-01	1.00e+00	no	up	_	_	_	_	_
c126282_g2	4.00	18.00	0.354	1.273	1.60	1.53e-01	1.00e+00	no	up	_	_	_	_	_
c96517_g1	4.00	18.00	0.244	1.055	1.75	1.53e-01	1.00e+00	no	up	_	_	_	_	_
c115756_g3	4.00	18.00	0.232	1.043	1.78	1.53e-01	1.00e+00	no	up	_	_	_	_	_
c119098_g3	4.00	18.00	0.648	2.800	1.95	1.53e-01	1.00e+00	no	up	_	_	_	_	_
c109733_g1	4.00	18.00	0.196	0.873	1.72	1.53e-01	1.00e+00	no	up	_	_	_	_	_
c106925_g1	4.00	18.00	0.305	1.334	1.82	1.53e-01	1.00e+00	no	up	_	_	_	_	_
c116927_g1	18.00	4.00	0.379	0.085	-1.37	1.53e-01	1.00e+00	no	down	_	_	_	_	_
c106348_g1	18.00	4.00	0.843	0.182	-1.74	1.53e-01	1.00e+00	no	down	_	_	_	_	_
c111207_g2	18.00	4.00	1.002	0.218	-1.79	1.53e-01	1.00e+00	no	down	_	_	_	_	_
c112525_g1	18.00	4.00	30.058	5.783	-2.36	1.53e-01	1.00e+00	no	down	_	_	_	_	_
c52357_g1	18.00	4.00	2.774	0.594	-2.05	1.53e-01	1.00e+00	no	down	_	_	_	_	_
c113909_g2	18.00	4.00	1.246	0.194	-2.19	1.53e-01	1.00e+00	no	down	_	_	_	_	_
c128630_g2	38.00	119.00	1.430	5.007	1.74	1.53e-01	1.00e+00	no	up	_	_	_	_	_
c118087_g1	318.00	98.00	34.677	9.990	-1.79	1.53e-01	1.00e+00	no	down	_	_	_	_	_
c116534_g2	21.00	70.00	5.205	6.219	0.25	1.54e-01	1.00e+00	no	up	GI12500 [Drosophila mojavensis]	_	_	_	_
c124987_g3	72.00	21.00	4.228	1.140	-1.80	1.54e-01	1.00e+00	no	down	_	_	_	_	_
c117037_g1	4164.00	12597.00	133.698	397.836	1.57	1.54e-01	1.00e+00	no	up	interferon inducible protein ISG12 [Dicentrarchus labrax]	_	_	_	PF06140.10|Ifi-6-16|Interferon-induced 6-16 family|m.40886:29-100
c122898_g1	31.00	101.00	0.953	3.079	1.59	1.54e-01	1.00e+00	no	up	_	_	_	_	_
c109326_g1	479.00	1454.00	10.606	30.066	1.49	1.54e-01	1.00e+00	no	up	hypothetical protein LOTGIDRAFT_165178 [Lottia gigantea]	_	_	EXD1, EGL	PF01612.17|DNA_pol_A_exo1|3'-5' exonuclease|m.35392:6-187
c130181_g2	22.00	73.00	1.381	4.716	1.70	1.54e-01	1.00e+00	no	up	_	_	_	_	_
c80697_g1	75.00	22.00	4.179	1.200	-1.72	1.54e-01	1.00e+00	no	down	hypothetical protein T265_10576 [Opisthorchis viverrini]	_	SJCHGC06753 protein	_	PF04845.10|PurA|PurA ssDNA and RNA-binding protein|m.54184:17-227
c124906_g3	946.00	295.00	24.120	7.395	-1.69	1.54e-01	1.00e+00	no	down	PREDICTED: complement C1q tumor necrosis factor-related protein 6-like [Maylandia zebra]	_	_	_	PF00386.18|C1q|C1q domain|m.67029:81-190
c117638_g3	23.00	76.00	1.075	3.479	1.61	1.55e-01	1.00e+00	no	up	_	_	_	_	_
c112045_g3	14.00	48.00	2.468	8.135	1.68	1.55e-01	1.00e+00	no	up	_	_	_	_	_
c106359_g1	50.00	14.00	6.415	1.746	-1.82	1.55e-01	1.00e+00	no	down	_	_	_	_	_
c110846_g1	50.00	14.00	1.723	0.473	-1.67	1.55e-01	1.00e+00	no	down	hypothetical protein HELRODRAFT_154200, partial [Helobdella robusta]	_	_	_	PF00595.21|PDZ|PDZ domain (Also known as DHR or GLGF)|m.68143:12-87
c119325_g3	5.00	21.00	2.358	9.202	1.92	1.55e-01	1.00e+00	no	up	_	_	_	_	_
c122814_g2	5.00	21.00	0.904	3.116	1.68	1.55e-01	1.00e+00	no	up	_	_	_	_	_
c96876_g1	5.00	21.00	0.501	2.061	1.85	1.55e-01	1.00e+00	no	up	_	_	_	_	_
c107128_g1	5.00	21.00	0.489	1.988	1.83	1.55e-01	1.00e+00	no	up	_	_	_	_	_
c106785_g2	5.00	21.00	0.232	0.958	1.67	1.55e-01	1.00e+00	no	up	_	_	_	_	_
c105030_g6	5.00	21.00	4.521	17.057	1.89	1.55e-01	1.00e+00	no	up	_	_	_	_	_
c130185_g2	21.00	5.00	1.075	0.255	-1.73	1.55e-01	1.00e+00	no	down	_	_	_	_	_
c105198_g1	21.00	5.00	2.823	0.655	-1.95	1.55e-01	1.00e+00	no	down	_	_	_	_	_
c112278_g1	21.00	5.00	2.688	0.618	-1.96	1.55e-01	1.00e+00	no	down	_	_	_	_	_
c104251_g1	21.00	5.00	1.760	0.412	-1.86	1.55e-01	1.00e+00	no	down	_	_	_	_	_
c128161_g1	21.00	5.00	1.613	0.376	-1.85	1.55e-01	1.00e+00	no	down	_	_	_	_	_
c107334_g1	21.00	5.00	1.271	0.315	-1.72	1.55e-01	1.00e+00	no	down	_	_	_	_	_
c55337_g2	21.00	5.00	1.760	0.412	-1.86	1.55e-01	1.00e+00	no	down	collagen type I/II/III/V/XI alpha [Clonorchis sinensis]	RecName: Full=Collagen alpha-1(I) chain; AltName: Full=Alpha-1 type I collagen; Flags: Precursor [Cynops pyrrhogaster]	_	COL2A	PF01391.15|Collagen|Collagen triple helix repeat (20 copies)|m.60453:2-59;PF01391.15|Collagen|Collagen triple helix repeat (20 copies)|m.60453:56-114;PF01391.15|Collagen|Collagen triple helix repeat (20 copies)|m.60453:239-297
c129259_g1	36.00	115.00	0.758	2.449	1.57	1.55e-01	1.00e+00	no	up	_	_	_	_	_
c122680_g1	15.00	51.00	0.868	2.813	1.59	1.56e-01	1.00e+00	no	up	RecName: Full=Molluscan insulin-related peptide 3; AltName: Full=MIP III; Contains: RecName: Full=Molluscan insulin-related peptide 3 B chain; Contains: RecName: Ful	RecName: Full=Molluscan insulin-related peptide 3; AltName: Full=MIP III; Contains: RecName: Full=Molluscan insulin-related peptide 3 B chain; Contains: RecName: Ful	_	_	PF00049.15|Insulin|Insulin/IGF/Relaxin family|m.17082:44-132
c109784_g1	221.00	670.00	38.795	113.146	1.54	1.56e-01	1.00e+00	no	up	hypothetical protein LOTGIDRAFT_155365 [Lottia gigantea]	RecName: Full=Cytochrome P450 2J2; AltName: Full=Arachidonic acid epoxygenase; AltName: Full=CYPIIJ2 [Homo sapiens]	_	CYP2J	PF00067.19|p450|Cytochrome P450|m.6012:1-191
c99478_g1	90.00	27.00	7.221	2.109	-1.73	1.56e-01	1.00e+00	no	down	template-activating factor I [Clonorchis sinensis]	_	SJCHGC01881 protein	SET, TAF1, I2PP2A	PF00956.15|NAP|Nucleosome assembly protein (NAP)|m.51369:14-171
c128076_g1	1775.00	5326.00	31.781	93.810	1.56	1.57e-01	1.00e+00	no	up	_	_	_	_	PF00452.16|Bcl-2|Apoptosis regulator proteins, Bcl-2 family|m.60533:82-164
c121985_g2	17.00	57.00	1.173	3.879	1.64	1.57e-01	1.00e+00	no	up	_	_	_	_	_
c105886_g1	6.00	24.00	0.428	2.037	2.02	1.57e-01	1.00e+00	no	up	_	_	_	_	_
c110743_g1	6.00	24.00	0.269	1.043	1.63	1.57e-01	1.00e+00	no	up	_	_	_	_	_
c109959_g1	24.00	6.00	1.588	0.388	-1.79	1.57e-01	1.00e+00	no	down	_	_	_	_	_
c86834_g1	18.00	60.00	0.635	2.085	1.57	1.57e-01	1.00e+00	no	up	hypothetical protein LOTGIDRAFT_225566 [Lottia gigantea]	RecName: Full=Arylsulfatase I; Short=ASI; Flags: Precursor	_	_	PF00884.20|Sulfatase|Sulfatase|m.43303:24-333
c110187_g1	62.00	18.00	7.673	2.182	-1.77	1.57e-01	1.00e+00	no	down	_	_	_	_	_
c110324_g1	1790.00	565.00	46.187	14.330	-1.68	1.58e-01	1.00e+00	no	down	scavenger receptor cysteine-rich protein variant 2 precursor [Strongylocentrotus purpuratus]	RecName: Full=Deleted in malignant brain tumors 1 protein; AltName: Full=Glycoprotein 340; Short=Gp-340; AltName: Full=Hensin; AltName: Full=Salivary agglutinin; S	_	_	PF00530.15|SRCR|Scavenger receptor cysteine-rich domain|m.44820:115-184;PF00530.15|SRCR|Scavenger receptor cysteine-rich domain|m.44820:202-300;PF00530.15|SRCR|Scavenger receptor cysteine-rich domain|m.44820:311-411
c116680_g1	19.00	63.00	1.002	3.237	1.60	1.58e-01	1.00e+00	no	up	_	_	_	_	_
c113389_g6	65.00	19.00	5.315	1.515	-1.75	1.58e-01	1.00e+00	no	down	_	_	_	_	_
c108964_g1	219.00	660.00	11.144	32.878	1.55	1.58e-01	1.00e+00	no	up	_	_	_	_	_
c129068_g1	107.00	327.00	5.462	16.439	1.57	1.58e-01	1.00e+00	no	up	_	_	_	_	_
c126665_g1	79.00	242.00	1.491	4.510	1.53	1.58e-01	1.00e+00	no	up	Fibrillin-1 [Crassostrea gigas]	RecName: Full=Multiple epidermal growth factor-like domains protein 6; Short=Multiple EGF-like domains protein 6; AltName: Full=Epidermal growth factor-like protein	_	FBLN1_2	PF07645.12|EGF_CA|Calcium-binding EGF domain|m.56923:144-183;PF07645.12|EGF_CA|Calcium-binding EGF domain|m.56923:189-226;PF07645.12|EGF_CA|Calcium-binding EGF domain|m.56923:228-268;PF07645.12|EGF_CA|Calcium-binding EGF domain|m.56923:397-436;PF07645.12|EGF_CA|Calcium-binding EGF domain|m.56923:483-520;PF07645.12|EGF_CA|Calcium-binding EGF domain|m.56923:526-564
c112141_g1	7.00	27.00	0.745	2.788	1.77	1.58e-01	1.00e+00	no	up	_	_	_	_	_
c127949_g3	7.00	27.00	0.305	1.176	1.66	1.58e-01	1.00e+00	no	up	_	_	_	_	_
c174294_g1	7.00	27.00	0.354	1.346	1.67	1.58e-01	1.00e+00	no	up	_	_	_	_	_
c112287_g1	7.00	27.00	0.965	3.613	1.80	1.58e-01	1.00e+00	no	up	_	_	_	_	_
c116630_g1	27.00	7.00	1.735	0.436	-1.78	1.58e-01	1.00e+00	no	down	_	_	_	_	_
c125993_g2	27.00	7.00	1.002	0.255	-1.63	1.58e-01	1.00e+00	no	down	_	_	_	_	_
c112872_g1	27.00	7.00	8.639	2.122	-1.98	1.58e-01	1.00e+00	no	down	_	_	_	_	_
c119031_g1	35.00	111.00	1.234	3.843	1.56	1.58e-01	1.00e+00	no	up	_	_	_	_	PF03318.10|ETX_MTX2|Clostridium epsilon toxin ETX/Bacillus mosquitocidal toxin MTX2|m.69273:95-215
c121210_g1	23.00	75.00	0.587	1.928	1.56	1.59e-01	1.00e+00	no	up	PREDICTED: uncharacterized protein LOC101854469 [Aplysia californica]	_	_	_	PF00797.14|Acetyltransf_2|N-acetyltransferase|m.50904:32-280
c105779_g1	8.00	30.00	0.403	1.503	1.67	1.59e-01	1.00e+00	no	up	_	_	_	_	PF00229.15|TNF|TNF(Tumour Necrosis Factor) family|m.72754:195-317
c126650_g2	30.00	8.00	0.660	0.388	-0.64	1.59e-01	1.00e+00	no	down	PREDICTED: uncharacterized protein LOC101850562 [Aplysia californica]	_	_	_	PF13676.3|TIR_2|TIR domain|m.31726:743-837;PF13676.3|TIR_2|TIR domain|m.31726:935-1029;PF00531.19|Death|Death domain|m.31726:646-722
c76093_g1	30.00	8.00	2.871	0.740	-1.82	1.59e-01	1.00e+00	no	down	phosphoglycerate kinase [Fasciola hepatica]	RecName: Full=Phosphoglycerate kinase [Opisthorchis sinensis]	Phosphoglycerate kinase (EC 2.7.2.3)	PGK, pgk	PF00162.16|PGK|Phosphoglycerate kinase|m.61318:8-231
c97637_g1	30.00	8.00	83.332	18.658	-2.15	1.59e-01	1.00e+00	no	down	_	_	_	_	_
c130652_g1	192.00	575.00	2.041	6.837	1.70	1.60e-01	1.00e+00	no	up	PREDICTED: proteasome activator complex subunit 4-like [Aplysia californica]	_	_	PSME4	PF16507.2|BLM10_mid|Proteasome-substrate-size regulator, mid region|m.64899:313-806;PF11919.5|DUF3437|Domain of unknown function (DUF3437)|m.64899:1751-1837
c122576_g1	33.00	9.00	0.904	0.242	-1.55	1.60e-01	1.00e+00	no	down	_	_	_	_	_
c90166_g1	33.00	9.00	10.496	2.703	-1.92	1.60e-01	1.00e+00	no	down	_	_	_	_	_
c121835_g1	206.00	617.00	7.014	21.228	1.58	1.60e-01	1.00e+00	no	up	hypothetical protein DICPUDRAFT_158441 [Dictyostelium purpureum]	_	_	_	_
c127382_g4	10.00	36.00	4.350	14.608	1.72	1.61e-01	1.00e+00	no	up	PREDICTED: uncharacterized protein LOC103032576 [Astyanax mexicanus]	RecName: Full=GTPase IMAP family member 4; AltName: Full=Immunity-associated nucleotide 1 protein; Short=IAN-1; AltName: Full=Immunity-associated protein 4 [Mus mu	_	_	PF04548.13|AIG1|AIG1 family|m.57748:91-129
c100499_g1	10.00	36.00	1.845	6.377	1.74	1.61e-01	1.00e+00	no	up	PREDICTED: solute carrier family 52, riboflavin transporter, member 3-like [Aplysia californica]	_	_	_	_
c125279_g2	36.00	10.00	1.588	0.436	-1.66	1.61e-01	1.00e+00	no	down	_	_	_	_	_
c119956_g1	36.00	10.00	1.686	0.461	-1.67	1.61e-01	1.00e+00	no	down	hypothetical protein VITISV_033485 [Vitis vinifera]	_	_	RAD5	PF00097.22|zf-C3HC4|Zinc finger, C3HC4 type (RING finger)|m.75723:51-90;PF13639.3|zf-RING_2|Ring finger domain|m.75723:50-91;PF13920.3|zf-C3HC4_3|Zinc finger, C3HC4 type (RING finger)|m.75723:49-94;PF13445.3|zf-RING_UBOX|RING-type zinc-finger|m.75723:51-88;PF13923.3|zf-C3HC4_2|Zinc finger, C3HC4 type (RING finger)|m.75723:50-90;PF14447.3|Prok-RING_4|Prokaryotic RING finger family 4|m.75723:51-95
c93695_g2	36.00	10.00	20.210	13.966	-0.53	1.61e-01	1.00e+00	no	down	_	_	_	_	_
c106781_g3	11.00	38.00	0.501	1.709	1.59	1.61e-01	1.00e+00	no	up	_	_	_	_	PF00822.17|PMP22_Claudin|PMP-22/EMP/MP20/Claudin family|m.76744:13-155
c119358_g4	40.00	11.00	3.299	0.885	-1.79	1.61e-01	1.00e+00	no	down	_	_	_	_	_
c109374_g1	107.00	33.00	8.248	2.497	-1.68	1.61e-01	1.00e+00	no	down	_	_	_	_	_
c118567_g1	110.00	34.00	2.884	0.873	-1.62	1.61e-01	1.00e+00	no	down	_	_	_	_	_
c124389_g1	287.00	854.00	6.109	17.858	1.53	1.61e-01	1.00e+00	no	up	_	_	_	_	PF00014.20|Kunitz_BPTI|Kunitz/Bovine pancreatic trypsin inhibitor domain|m.71296:52-102
c121538_g1	12.00	41.00	0.733	1.467	0.91	1.62e-01	1.00e+00	no	up	_	_	_	_	_
[truncated: 72,514 more rows]
